# Supplementary material for: The effect of ammonia and formic acid on the oxidation of CO via a simple Criegee intermediate
Source: Royal Society of Chemistry journal article supplement (doi:10.1039/d0cp05270a), 2021-01-01
Supplement: d0cp05270a1.pdf [file d0cp05270a1.pdf]

**Supplementary Information for**  
**Effect of Ammonia and Formic acid on the**  
**oxidation of CO by simple Criegee intermediate.**

Amit Kumar and Pradeep Kumar\*

*Department of Chemistry, Malaviya National Institute of Technology Jaipur, Jaipur,*  
*302017, India*

E-mail: [pradeep.chy@mnit.ac.in](mailto:pradeep.chy@mnit.ac.in)

## Sl. No.

## Contents

1. Formal proof for same value of termolecular rate constant for path A, B and C.
2. **Table S1:** Optimized geometries in Cartesian coordinates and all normal mode frequencies calculated at the M062X/aug-cc-pVTZ level of theory.
3. **Table S2:** Bimolecular rate constant  $k_b$  in ( $\text{cm}^3 \text{ molecule}^{-1} \text{ sec}^{-1}$ ) for AM catalyzed channel corresponds to TS1 within the temperature range of 213-1000 K.
4. **Table S3:** Bimolecular rate constant  $k_b$  in ( $\text{cm}^3 \text{ molecule}^{-1} \text{ sec}^{-1}$ ) for AM catalyzed channel corresponds to TS2 within the temperature range of 213-1000 K.
5. **Table S4:** Bimolecular rate constant  $k_b$  in ( $\text{cm}^3 \text{ molecule}^{-1} \text{ sec}^{-1}$ ) for AM catalyzed channel corresponds to TS3 within the temperature range of 213-1000 K.
6. **Table S5:** Bimolecular rate constant  $k_b$  in ( $\text{cm}^3 \text{ molecule}^{-1} \text{ sec}^{-1}$ ) for AM catalyzed channel corresponds to TS2' within the temperature range of 213-1000 K.
7. **Table S6:** Relative energies ( $\Delta E$ ) including ZPE in  $\text{kcal mol}^{-1}$  for all the species with respect to the isolated reactants at the CCSD(T)/aug-cc-pVTZ//M06-2X/aug-cc-pVTZ level of theory in the presence
8. **Table S7:** Concentration of different bimolecular species in in molecules  $\text{cm}^{-3}$ , calculated using the  $k_{eq1}$  values of path A, B, and C for AM catalyzed channel.
9. **Table S8:** Concentration of different bimolecular species in in molecules  $\text{cm}^{-3}$ , calculated using the  $k_{eq1}$  values of path A, B, and C for FA catalyzed channel.
10. **Table S9:** Termolecular rate constant  $k_t$  in ( $\text{cm}^6 \text{ molecule}^{-2} \text{ sec}^{-1}$ ) for AM catalyzed channel corresponds to TS1 within the temperature range of 213-1000K.
11. **Table S10:** Termolecular rate constant  $k_t$  in ( $\text{cm}^6 \text{ molecule}^{-2} \text{ sec}^{-1}$ ) for AM catalyzed channel corresponds to TS2 within the temperature range of 213-1000K.
12. **Table S11:** Termolecular rate constant  $k_t$  in ( $\text{cm}^6 \text{ molecule}^{-2} \text{ sec}^{-1}$ ) for AM catalyzed channel corresponds to TS3 within the temperature range of 213-1000K.
13. **Table S12:** Termolecular rate constant  $k_t$  in ( $\text{cm}^6 \text{ molecule}^{-2} \text{ sec}^{-1}$ ) for AM catalyzed channel corresponds to TS2' within the temperature range of 213-1000K.
14. **Figure S1:** Gibbs free energy profile for  $\text{CH}_2\text{OO} + \text{CO}$  reaction in presence of AM calculated at CCSD(T)/aug-cc-pVTZ//M06-2X/aug-cc-pVTZ level of theory.
15. **Table S13:** Bimolecular rate constant  $k_b$  in ( $\text{cm}^3 \text{ molecule}^{-1} \text{ sec}^{-1}$ ) for FA catalyzed channel corresponds to TS2 within the temperature range of 213-1000 K.
16. **Table S14:** Bimolecular rate constant  $k_b$  in ( $\text{cm}^3 \text{ molecule}^{-1} \text{ sec}^{-1}$ ) FA catalyzed channel corresponds to TS3 within the temperature range of 213-1000 K.

**Sl. No.****Contents**

17. **Table S15:** Relative energies ( $\Delta E$ ) including ZPE in kcal mol<sup>-1</sup> for all the species with respect to the isolated reactants at the CCSD(T)/aug-cc-pVTZ level of theory in the presence of FA.
18. **Table S16:** Termolecular rate constant  $k_t$  in (cm<sup>6</sup> molecule<sup>-2</sup> sec<sup>-1</sup>) for FA catalyzed channel corresponds to TS2 within the temperature range of 213-1000K.
19. **Table S17:** Termolecular rate constant  $k_t$  in (cm<sup>6</sup> molecule<sup>-2</sup> sec<sup>-1</sup>) for FA catalyzed channel corresponds to TS3 within the temperature range of 213-1000K.
20. **Table S18:** Concentrations of AM and FA in molecules cm<sup>-3</sup>,  $k_t$  in cm<sup>6</sup> molecule<sup>-2</sup> sec<sup>-1</sup> and  $k_{eff}$  in cm<sup>3</sup> molecule<sup>1</sup> sec<sup>1</sup> at higher altitude.
21. **Table S19:** Concentrations of AD and AW in molecules cm<sup>-3</sup>,  $k_t$  in cm<sup>6</sup> molecule<sup>-2</sup> sec<sup>-1</sup> and  $k_{eff}$  in cm<sup>3</sup> molecule<sup>-1</sup> sec<sup>-1</sup> at higher altitude.
22. **Table S20:** T1 diagnostic values for the different TSs calculated at CCSD(T)/aug-cc-pVTZ level of theory.
23. **Table S21:** Energy barrier of uncatalyzed reaction obtained at different methods from our earlier works.
24. **Table S22:** Concentrations of all the catalysts (in molecule cm<sup>-3</sup>) within 280K to 320K temperature range at 0 km altitude.
25. **Figure S2:** Gibbs free energy profile for CH<sub>2</sub>OO + CO reaction in presence of FA calculated at CCSD(T)/aug-cc-pVTZ//M06-2X/aug-cc-pVTZ level of theory.

# 1 Formal proof for same value of termolecular rate constant for path A, B and C

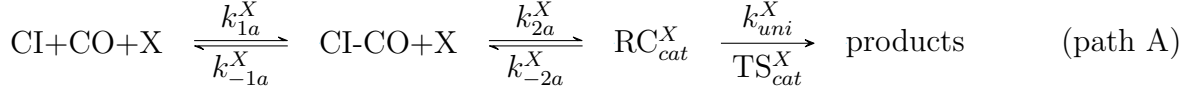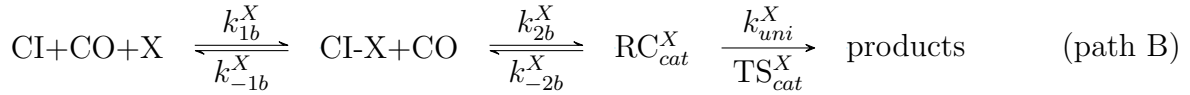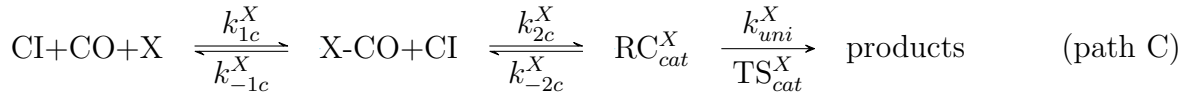

where CI=CH<sub>2</sub>OO; X= AM, FA, AD and AW (AM=NH<sub>3</sub>, FA=HCOOH, AD=(NH<sub>3</sub>)<sub>2</sub> and AW=NH<sub>3</sub>-H<sub>2</sub>O) .

For path A,

$$K_{eq1} = \frac{[\text{CI} - \text{CO}]}{[\text{CI}][\text{CO}]} \quad (1)$$

and

$$K_{eq2} = \frac{[\text{RC}_{cat}^X]}{[\text{CI} - \text{CO}][\text{X}]} \quad (2)$$

and

$$k_t = K_{eq1} K_{eq2} k_{uni} \quad (3)$$

Therefore,

$$k_t = \frac{[RC_{cat}^X]}{[CI][CO][X]} k_{uni} \quad (4)$$

It is evident from equation 4, as  $k_{uni}$  is same for all the paths, the values of  $k_t$  depends on the concentration of the isolated reactants and  $RC_{cat}$ . Therefore, the values of  $k_t$  are same for all the paths, whereas the bimolecular rate constant ( $k_{bi}=K_{eq2}k_{uni}$ ) are different for the path A, B and C, which are defined as follows.

For path A

$$k_{bi} = \frac{[RC_{cat}^X]}{[CI - CO][X]} k_{uni} \quad (5)$$

For path B

$$k_{bi} = \frac{[RC_{cat}^X]}{[CI - X][CO]} k_{uni} \quad (6)$$

and For path C

$$k_{bi} = \frac{[RC_{cat}^X]}{[X - CO][CI]} k_{uni} \quad (7)$$

Table S1: Optimized geometries in Cartesian coordinates and normal mode frequencies of all species calculate at M06-2X/aug-cc-pVTZ level of theory

| compound | GEOMETRY |           |           | FREQUENCY |           |           |           |
|----------|----------|-----------|-----------|-----------|-----------|-----------|-----------|
| CI       | O        | -1.167369 | 0.192586  | 0.000105  | 538.3305  | 697.3217  | 929.575   |
|          | O        | 0.006904  | -0.459273 | -0.000058 | 1022.7741 | 1260.7685 | 1432.8735 |
|          | C        | 1.054173  | 0.202791  | -0.000096 | 1629.6696 | 3139.9976 | 3290.8134 |
|          | H        | 0.986317  | 1.284825  | 0.000206  |           |           |           |
|          | H        | 1.972367  | -0.368079 | -0.000004 |           |           |           |
| AM       | N        | 0         | 0         | 0.112225  | 1033.2919 | 1660.4155 | 1660.6925 |
|          | H        | 0         | 0.940561  | -0.261858 | 3508.4386 | 3633.8182 | 3633.8396 |
|          | H        | -0.814549 | -0.47028  | -0.261858 |           |           |           |
|          | H        | 0.814549  | -0.47028  | -0.261858 |           |           |           |
| FA       | C        | 0         | 0.421156  | 0         | 646.9752  | 667.8794  | 1069.9376 |
|          | H        | -0.373354 | 1.450506  | 0         | 1161.5421 | 1320.6117 | 1407.3215 |
|          | O        | 1.151966  | 0.110007  | 0         | 1864.3379 | 3118.563  | 3782.4576 |
|          | O        | -1.023304 | -0.440213 | 0         |           |           |           |
|          | H        | -0.65594  | -1.335795 | 0         |           |           |           |
| CO       | C        | 0         | 0         | -0.640774 | 2272.4229 |           |           |
|          | O        | 0         | 0         | 0.480581  |           |           |           |
| CI-CO    | O        | -0.721097 | 1.208374  | 0.198852  | 75.6097   | 111.6637  | 136.8406  |
|          | O        | -1.210084 | 0.107856  | -0.404976 | 168.4595  | 190.9485  | 541.7498  |
|          | C        | -1.166233 | -0.966006 | 0.210963  | 699.3429  | 930.6858  | 1039.4746 |
|          | H        | -0.76154  | -0.977327 | 1.21611   | 1262.0199 | 1437.1265 | 1636.1261 |
|          | H        | -1.553608 | -1.827074 | -0.316513 | 2226.3558 | 3144.1455 | 3292.5125 |
|          | O        | 1.643938  | -0.603723 | -0.058612 |           |           |           |
|          | C        | 1.935083  | 0.483396  | -0.007914 |           |           |           |
| CI-AM    | O        | 0.886141  | -1.125979 | 0.183055  | 106.8828  | 151.9586  | 181.0689  |
|          | O        | 1.016229  | 0.106757  | -0.401352 | 215.3251  | 279.8741  | 434.8311  |
|          | C        | 0.575003  | 1.070636  | 0.23227   | 530.2639  | 696.8345  | 889.9798  |
|          | H        | 0.180913  | 0.917154  | 1.227438  | 1058.0527 | 1099.2034 | 1255.6926 |

|       |           |           |           |           |           |           |           |
|-------|-----------|-----------|-----------|-----------|-----------|-----------|-----------|
|       | H         | 0.639517  | 2.032019  | -0.261134 | 1444.6757 | 1648.925  | 1661.1666 |
|       | H         | -1.247871 | -0.806341 | 0.033945  | 1675.2473 | 3155.4501 | 3299.027  |
|       | H         | -2.657836 | -0.194462 | 0.607134  | 3443.828  | 3580.5379 | 3631.4123 |
|       | N         | -1.898801 | -0.024895 | -0.040268 |           |           |           |
|       | H         | -2.292093 | -0.044148 | -0.972748 |           |           |           |
| CI-FA | O         | 1.522375  | -1.265974 | 0.256751  | 41.9567   | 49.0643   | 77.1525   |
|       | O         | 1.830864  | -0.137619 | -0.458304 | 119.7634  | 133.3384  | 215.1622  |
|       | C         | 1.720685  | 0.944039  | 0.123687  | 526.5886  | 648.7076  | 678.7974  |
|       | H         | 1.424088  | 0.955858  | 1.164877  | 697.0752  | 882.2009  | 1076.8781 |
|       | H         | 1.936685  | 1.825695  | -0.465782 | 1114.5683 | 1169.0956 | 1255.0398 |
|       | C         | -1.345807 | -0.142304 | 0.034783  | 1320.844  | 1421.0003 | 1444.3947 |
|       | H         | -0.703976 | -1.027553 | 0.072453  | 1668.3331 | 1807.8019 | 3123.8851 |
|       | O         | -0.940906 | 0.988968  | 0.112661  | 3149.2288 | 3293.2823 | 3788.1571 |
|       | O         | -2.633153 | -0.45248  | -0.10933  |           |           |           |
| H     | -3.139511 | 0.372426  | -0.136594 |           |           |           |           |
| AM-CO | O         | 1.273991  | -0.00002  | 0.00944   | 26.0058   | 32.0058   | 40.6361   |
|       | C         | 2.395388  | 0.00008   | -0.020557 | 60.7292   | 69.4349   | 1030.4775 |
|       | H         | -1.527828 | 0.298073  | 0.045633  | 1659.306  | 1661.7479 | 2268.4946 |
|       | H         | -2.547679 | -0.921967 | -0.302802 | 3509.6347 | 3632.7957 | 3636.3804 |
|       | N         | -2.492724 | 0.00028   | 0.110902  |           |           |           |
|       | H         | -3.039677 | 0.621621  | -0.471318 |           |           |           |
| FA-CO | O         | 1.870904  | 0.484973  | -0.00011  | 27.1465   | 40.4119   | 81.6246   |
|       | C         | 2.432727  | -0.488129 | 0.000289  | 94.7543   | 104.8495  | 653.2758  |
|       | C         | -1.617691 | -0.204638 | 0.000243  | 698.4783  | 1078.4397 | 1173.8733 |
|       | H         | -2.710616 | -0.27135  | 0.001026  | 1329.7019 | 1417.4851 | 1861.4758 |
|       | O         | -0.877813 | -1.142644 | -0.000307 | 2252.3253 | 3097.9948 | 3783.3724 |
|       | O         | -1.232566 | 1.074013  | -0.000024 |           |           |           |
|       | H         | -0.263804 | 1.097224  | -0.000687 |           |           |           |
|       | O         | -0.734834 | -0.505214 | 1.193751  | 54.3403   | 70.5179   | 105.3759  |
|       | O         | -1.588472 | -0.357129 | 0.147706  | 109.8829  | 153.8761  | 160.7957  |
|       | C         | -1.145536 | -0.516963 | -0.998526 | 170.6209  | 177.2415  | 190.3584  |

|                                 |   |           |           |           |           |           |           |
|---------------------------------|---|-----------|-----------|-----------|-----------|-----------|-----------|
| RC <sup>AM</sup> <sub>cat</sub> | H | -0.099253 | -0.789963 | -1.137064 | 254.3528  | 411.0792  | 552.302   |
|                                 | H | -1.871665 | -0.3705   | -1.788538 | 722.6239  | 912.0959  | 1099.9492 |
|                                 | O | 0.337558  | 1.831433  | -0.442216 | 1111.4868 | 1289.8044 | 1460.4466 |
|                                 | C | 0.908218  | 1.655934  | 0.511808  | 1635.4926 | 1655.4392 | 1675.6313 |
|                                 | H | 1.258796  | -1.173337 | 0.564669  | 2235.5942 | 3076.4544 | 3255.8175 |
|                                 | H | 2.208955  | -2.276976 | -0.187969 | 3460.3065 | 3585.6024 | 3623.8723 |
|                                 | N | 1.875695  | -1.321697 | -0.231497 |           |           |           |
|                                 | H | 2.683196  | -0.723885 | -0.104234 |           |           |           |
| RC <sup>AM</sup> <sub>cat</sub> | O | 0.327493  | 0.005472  | -1.178431 | 26.3232   | 63.3242   | 71.7284   |
|                                 | O | 0.434153  | -1.211662 | -0.571223 | 98.3401   | 103.0608  | 136.6712  |
|                                 | C | 0.294455  | -1.238581 | 0.658011  | 148.1194  | 176.1772  | 188.2447  |
|                                 | H | 0.136005  | -0.315352 | 1.201404  | 287.0223  | 303.9566  | 497.8356  |
|                                 | H | 0.351332  | -2.218412 | 1.11392   | 542.2006  | 685.0235  | 707.4772  |
|                                 | O | 2.749156  | 0.256123  | 0.607318  | 921.6167  | 1035.6542 | 1078.3423 |
|                                 | C | 2.717839  | 1.05372   | -0.186498 | 1154.9628 | 1263.2352 | 1292.4099 |
|                                 | C | -2.043005 | 0.376366  | -0.203312 | 1430.9275 | 1449.3524 | 1653.0386 |
|                                 | H | -2.224658 | 0.542065  | -1.269144 | 1855.2964 | 2233.6982 | 3100.5856 |
|                                 | O | -2.234323 | -0.665596 | 0.353376  | 3150.161  | 3295.2026 | 3853.5569 |
|                                 | O | -1.619197 | 1.453879  | 0.474933  |           |           |           |
|                                 | H | -1.336658 | 2.136943  | -0.143178 |           |           |           |
| TS1 <sup>AM</sup>               | C | -1.071739 | 0.587814  | 0.937974  | -412.2319 | 61.7026   | 111.7225  |
|                                 | O | -1.631656 | 0.517457  | -0.208207 | 132.1063  | 155.0695  | 163.1685  |
|                                 | O | -0.691464 | 0.083947  | -1.113415 | 191.6004  | 232.337   | 355.483   |
|                                 | C | -0.03775  | -1.161374 | 0.292862  | 479.6789  | 517.1806  | 626.4021  |
|                                 | H | -0.058505 | 0.970099  | 1.027071  | 853.0478  | 1006.2294 | 1085.8911 |
|                                 | H | -1.765504 | 0.612014  | 1.77241   | 1167.0871 | 1250.7665 | 1403.6395 |
|                                 | O | 0.834481  | -1.854541 | 0.089693  | 1559.6696 | 1651.1982 | 1668.3084 |
|                                 | H | 1.404053  | 1.04544   | -0.766293 | 2167.6348 | 3104.2825 | 3240.6876 |
|                                 | H | 2.654406  | 0.440025  | 0.08871   | 3482.9956 | 3600.1633 | 3627.0084 |
|                                 | N | 1.97687   | 1.192297  | 0.06001   |           |           |           |
|                                 | H | 2.493499  | 2.052798  | -0.071556 |           |           |           |
|                                 | C | -1.946948 | -1.106623 | -0.003002 | -713.8534 | 39.1757   | 75.3121   |



|                    |           |           |           |           |           |           |           |
|--------------------|-----------|-----------|-----------|-----------|-----------|-----------|-----------|
| TS2 <sup>AM</sup>  | O         | -0.816547 | -1.55319  | 0.002786  | 76.9373   | 137.555   | 154.8936  |
|                    | O         | 0.286468  | -0.392852 | 0.001205  | 157.8432  | 246.9321  | 267.9085  |
|                    | H         | -2.117026 | -0.023056 | -0.007909 | 330.3118  | 424.0786  | 525.291   |
|                    | H         | -2.765372 | -1.83124  | -0.002655 | 541.6007  | 595.5344  | 1105.9678 |
|                    | C         | 1.934488  | 0.424144  | -0.000652 | 1232.8662 | 1270.2529 | 1496.9804 |
|                    | O         | 2.978091  | -0.006145 | -0.000927 | 1651.8294 | 1675.1615 | 1760.3617 |
|                    | N         | -1.549393 | 2.085739  | 0.000427  | 2192.0824 | 3005.245  | 3147.3801 |
|                    | H         | -1.558397 | 2.690972  | -0.811119 | 3459.7823 | 3584.7066 | 3625.3143 |
|                    | H         | -0.660597 | 1.588042  | 0.001605  |           |           |           |
|                    | H         | -1.562188 | 2.687481  | 0.814505  |           |           |           |
| TS3 <sup>AM</sup>  | O         | 0.540962  | 0.138086  | 1.175009  | -457.8337 | 56.1063   | 91.4265   |
|                    | O         | 1.26743   | 0.858839  | 0.237791  | 131.5616  | 159.4285  | 229.7871  |
|                    | C         | 0.656429  | 0.87006   | -0.872952 | 256.8981  | 302.9433  | 358.0486  |
|                    | H         | -0.430585 | 0.873192  | -0.897009 | 461.4445  | 581.0119  | 712.3249  |
|                    | H         | 1.280468  | 1.142262  | -1.71617  | 795.341   | 975.9235  | 1091.1217 |
|                    | O         | 0.45102   | -1.203849 | -0.757232 | 1160.7363 | 1267.3551 | 1427.5928 |
|                    | C         | 0.282735  | -1.394202 | 0.393981  | 1570.965  | 1652.1036 | 1662.3781 |
|                    | H         | -1.961907 | 0.334702  | 0.866855  | 1828.2279 | 3096.0452 | 3256.2366 |
|                    | H         | -2.565796 | -0.641612 | -0.283254 | 3491.9242 | 3606.5729 | 3625.493  |
|                    | N         | -2.391412 | 0.329685  | -0.052655 |           |           |           |
| TS2' <sub>AM</sub> | C         | -1.553187 | -0.138592 | -0.097286 | -294.3576 | 130.9221  | 173.683   |
|                    | O         | -0.580506 | -0.959575 | -0.555657 | 242.0224  | 283.8602  | 314.6688  |
|                    | O         | 0.384612  | -1.073125 | 0.517281  | 414.3733  | 564.8307  | 697.5868  |
|                    | H         | -2.048016 | -0.503561 | 0.804742  | 839.3557  | 887.5051  | 923.1262  |
|                    | H         | -2.262271 | 0.057746  | -0.900516 | 1053.3737 | 1206.7131 | 1235.2425 |
|                    | C         | 1.785064  | -0.141899 | 0.311309  | 1313.7842 | 1402.0514 | 1500.7656 |
|                    | O         | 1.591922  | 0.716787  | -0.486105 | 1503.7659 | 1569.272  | 1636.8237 |
|                    | H         | 0.014676  | 1.212578  | -0.280812 | 1797.3421 | 2797.1059 | 3069.2103 |
|                    | H         | -1.470738 | 2.002449  | 0.121678  | 3141.6638 | 3471.6883 | 3571.0865 |
|                    | N         | -0.887446 | 1.185422  | 0.274313  |           |           |           |
| H                  | -0.581006 | 1.143076  | 1.246439  |           |           |           |           |

|                               |          |           |           |           |           |           |           |
|-------------------------------|----------|-----------|-----------|-----------|-----------|-----------|-----------|
| TS <sub>2</sub> <sup>FA</sup> | C        | -0.310897 | 2.125698  | -0.277639 | -704.662  | 26.8354   | 38.2217   |
|                               | O        | 0.39235   | 1.647312  | 0.586562  | 44.6175   | 85.8707   | 112.7624  |
|                               | O        | 1.151272  | 0.340682  | 0.043712  | 117.1128  | 136.2876  | 179.7562  |
|                               | H        | -0.318826 | 1.689351  | -1.275443 | 254.5102  | 353.7154  | 506.2864  |
|                               | H        | -0.916572 | 2.99835   | -0.028026 | 518.6082  | 593.9248  | 644.1154  |
|                               | O        | 3.537838  | -1.035864 | 0.004389  | 1192.226  | 1243.0821 | 1286.6143 |
|                               | C        | -1.762928 | -0.945915 | 0.034953  | 1432.7202 | 1471.5055 | 1777.0613 |
|                               | O        | -2.274233 | 0.283743  | -0.233346 | 1866.0319 | 2204.6327 | 3076.7537 |
|                               | H        | -3.237623 | 0.189894  | -0.264527 | 3098.9309 | 3201.8502 | 3783.9194 |
|                               | O        | -2.449842 | -1.907752 | 0.18693   |           |           |           |
|                               | H        | -0.66883  | -0.895241 | 0.082919  |           |           |           |
| TS <sub>3</sub> <sup>FA</sup> | O        | -0.608463 | 0.92525   | 0.394006  | -474.2481 | 46.1593   | 53.3261   |
|                               | O        | -0.793763 | -0.271059 | 1.080814  | 112.697   | 139.2903  | 172.7014  |
|                               | C        | -1.03563  | -1.189214 | 0.229383  | 185.9818  | 294.7149  | 353.0274  |
|                               | H        | -0.487817 | -1.213991 | -0.700694 | 478.0179  | 598.1373  | 685.1773  |
|                               | H        | -1.501333 | -2.072676 | 0.649053  | 707.2076  | 833.2516  | 881.2537  |
|                               | O        | -2.435548 | -0.12089  | -0.647677 | 993.8079  | 1090.6273 | 1151.4066 |
|                               | C        | -2.064699 | 1.001091  | -0.611248 | 1242.3073 | 1243.6599 | 1388.5837 |
|                               | C        | 2.517572  | -0.134191 | -0.254774 | 1399.4372 | 1432.1775 | 1561.9989 |
|                               | H        | 3.602935  | -0.188158 | -0.390724 | 1810.5178 | 1824.6808 | 3094.2781 |
|                               | O        | 1.785653  | -1.079517 | -0.397122 | 3164.1754 | 3302.0516 | 3444.7307 |
|                               | O        | 2.141962  | 1.083791  | 0.079202  |           |           |           |
| H                             | 1.164035 | 1.108113  | 0.188418  |           |           |           |           |
| PC <sub>AM</sub>              | O        | -0.920109 | -1.293905 | 0.0321    | 26.7363   | 36.298    | 74.8132   |
|                               | O        | 0.249903  | 1.343402  | -0.127298 | 90.5987   | 102.5345  | 113.9131  |
|                               | C        | 1.420388  | 1.470668  | 0.109001  | 148.0607  | 181.7028  | 195.4221  |
|                               | H        | 2.155279  | 1.662712  | -0.686366 | 314.5983  | 346.0399  | 681.9393  |
|                               | H        | 1.815682  | 1.423286  | 1.133968  | 696.6761  | 1084.1605 | 1203.7597 |
|                               | O        | -2.565714 | 0.326969  | -0.003641 | 1271.407  | 1410.1527 | 1539.331  |
|                               | C        | -1.727933 | -0.463712 | 0.013339  | 1656.2739 | 1666.5831 | 1848.3115 |
|                               | H        | 1.404202  | -1.325931 | -0.025459 | 2442.2376 | 2980.5824 | 3055.3309 |
|                               | H        | 2.827555  | -1.680155 | 0.690615  | 3496.461  | 3613.3252 | 3627.2987 |
|                               | N        | 2.394272  | -1.104279 | -0.020576 |           |           |           |

|                  |   |           |           |           |           |           |           |
|------------------|---|-----------|-----------|-----------|-----------|-----------|-----------|
|                  | H | 2.770002  | -1.403417 | -0.912047 |           |           |           |
| PC <sup>FA</sup> | O | 1.466998  | -1.484622 | -0.000476 | 15.3318   | 24.5222   | 52.7878   |
|                  | O | 0.681113  | 1.301088  | -0.007455 | 73.8858   | 87.3178   | 101.5136  |
|                  | C | -0.167407 | 2.15155   | 0.000294  | 117.7131  | 143.7027  | 149.3835  |
|                  | H | -0.566308 | 2.561833  | 0.939176  | 190.216   | 310.5308  | 651.9225  |
|                  | H | -0.576004 | 2.56923   | -0.931126 | 676.7505  | 684.7367  | 696.0738  |
|                  | O | 3.314283  | -0.097328 | 0.00316   | 1103.2052 | 1176.2619 | 1214.7139 |
|                  | C | 2.37996   | -0.773168 | 0.001285  | 1271.3564 | 1327.0216 | 1410.5861 |
|                  | C | -1.903599 | -0.416604 | -0.000829 | 1423.6787 | 1539.9662 | 1830.8925 |
|                  | H | -0.832593 | -0.642717 | -0.006527 | 1853.2122 | 2443.0118 | 2982.7794 |
|                  | O | -2.368171 | 0.689706  | 0.005912  | 3061.2675 | 3122.0563 | 3793.1172 |
|                  | O | -2.633126 | -1.531401 | -0.002272 |           |           |           |
|                  | H | -3.567596 | -1.278556 | 0.003043  |           |           |           |
| CO <sub>2</sub>  | C | 0         | 0         | 0         | 694.1376  | 694.1376  | 1410.9715 |
|                  | O | 0         | 0         | 1.155191  | 2443.6758 |           |           |
|                  | O | 0         | 0         | -1.155191 |           |           |           |
| AD               | H | -2.15255  | -0.81368  | -0.07049  | 77.7318   | 82.9753   | 101.0892  |
|                  | H | -0.85738  | 0.00036   | -0.645    | 146.1927  | 222.7329  | 440.8265  |
|                  | N | -1.56912  | 0.00001   | 0.07794   | 1047.5414 | 1077.7403 | 1646.316  |
|                  | H | -2.15323  | 0.81324   | -0.07032  | 1663.6917 | 1665.2577 | 1675.0525 |
|                  | N | 1.5691    | 0         | -0.07793  | 3491.6582 | 3495.5698 | 3613.223  |
|                  | H | 2.15291   | -0.81346  | 0.07023   | 3613.3071 | 3630.5744 | 3630.6531 |
|                  | H | 0.85753   | -0.00004  | 0.64517   |           |           |           |
| AW               | H | -0.58804  | -0.05095  | -0.0044   | 65.1853   | 153.9747  | 172.6454  |
|                  | H | -1.95313  | -0.76318  | -0.00176  | 197.4459  | 443.3111  | 684.304   |
|                  | N | 1.38237   | -0.02344  | -0.00029  | 1085.5552 | 1642.6441 | 1658.3388 |
|                  | H | 1.88023   | -0.66512  | 0.60395   | 1664.6034 | 3506.3407 | 3626.7492 |
|                  | H | 1.58213   | 0.914     | 0.32746   | 3631.9805 | 3638.3324 | 3939.0277 |
|                  | H | 1.78143   | -0.10832  | -0.92691  |           |           |           |
|                  | O | -1.54741  | 0.10471   | 0.00046   |           |           |           |

|                   |   |          |          |          |           |           |           |
|-------------------|---|----------|----------|----------|-----------|-----------|-----------|
| AD-CO             | C | -2.14395 | -0.11388 | -0.00105 | 22.085    | 55.263    | 66.9424   |
|                   | O | -1.42379 | -0.97655 | 0.00075  | 83.0002   | 99.513    | 108.1669  |
|                   | H | 1.05543  | 1.12617  | 0.00046  | 121.4865  | 135.0501  | 153.7703  |
|                   | H | 2.44935  | -1.30029 | -0.8171  | 246.8877  | 387.7987  | 1060.7997 |
|                   | H | 2.45701  | -1.3026  | 0.81146  | 1075.3545 | 1650.9663 | 1661.8043 |
|                   | N | 1.97545  | -0.9363  | -0.00006 | 1662.0728 | 1682.1058 | 2251.7152 |
|                   | H | 0.50568  | 2.43726  | -0.81166 | 3464.371  | 3505.1725 | 3589.4097 |
|                   | H | 1.04037  | -1.32634 | 0.00371  | 3625.47   | 3627.6359 | 3632.0039 |
|                   | N | 0.34496  | 1.85426  | 0.00006  |           |           |           |
|                   | H | 0.50326  | 2.43573  | 0.81336  |           |           |           |
| AW-CO             | C | 2.5054   | -0.48846 | -0.00515 | 12.7178   | 23.5023   | 36.8199   |
|                   | O | 2.86107  | 0.5751   | 0.00051  | 78.7722   | 124.5531  | 133.8275  |
|                   | H | -1.33516 | -0.23995 | 0.00363  | 185.0058  | 191.9723  | 212.1129  |
|                   | H | -3.90985 | -0.50096 | -0.33908 | 473.8108  | 706.9962  | 1087.0248 |
|                   | H | -3.54131 | 0.46117  | 0.92647  | 1645.6102 | 1657.959  | 1662.1091 |
|                   | N | -3.24692 | 0.18594  | -0.0024  | 2271.5261 | 3506.7628 | 3617.2947 |
|                   | H | -0.16076 | -1.24302 | -0.00346 | 3628.5376 | 3631.1887 | 3929.9305 |
|                   | H | -3.32934 | 1.00105  | -0.59779 |           |           |           |
|                   | O | -0.3645  | -0.30624 | 0.00672  |           |           |           |
| TS1 <sup>AD</sup> | C | -1.58013 | 0.91694  | -0.44753 | -418.0301 | 41.8992   | 63.5288   |
|                   | O | -1.99363 | -0.27342 | -0.66048 | 65.9222   | 115.0561  | 134.0152  |
|                   | O | -0.96352 | -1.13439 | -0.35642 | 155.5577  | 162.3324  | 179.7587  |
|                   | C | -0.54955 | 0.06436  | 1.18992  | 190.0204  | 199.2758  | 230.1844  |
|                   | H | -0.57079 | 1.22485  | -0.71578 | 285.2539  | 319.9794  | 468.8911  |
|                   | H | -2.37573 | 1.64858  | -0.33935 | 476.3752  | 511.0585  | 623.9371  |
|                   | O | 0.31349  | -0.17052 | 1.88466  | 863.0728  | 1010.3351 | 1097.1355 |
|                   | H | 1.99489  | 2.36369  | -1.12163 | 1136.4554 | 1174.7798 | 1237.7573 |
|                   | H | 1.91337  | 0.83861  | -0.52403 | 1400.3192 | 1573.5043 | 1645.4687 |
|                   | N | 1.54186  | 1.78541  | -0.42467 | 1658.0292 | 1673.7231 | 1689.216  |
|                   | H | 1.84361  | 2.12886  | 0.47936  | 2167.0692 | 3074.7504 | 3223.3267 |
|                   | N | 2.06564  | -1.28902 | -0.62694 | 3402.4072 | 3478.5336 | 3563.6003 |
|                   | H | 2.58718  | -1.86889 | -1.2719  | 3592.4849 | 3620.3814 | 3627.2367 |
|                   | H | 1.07763  | -1.39737 | -0.84137 |           |           |           |

|                   |   |          |          |          |           |           |           |
|-------------------|---|----------|----------|----------|-----------|-----------|-----------|
|                   | H | 2.20468  | -1.67418 | 0.29958  |           |           |           |
| TS2 <sup>AD</sup> | C | -0.88547 | -1.15866 | 0.02234  | -699.7022 | 16.5677   | 29.1739   |
|                   | O | 0.12414  | -1.15707 | 0.69887  | 52.5147   | 60.2858   | 86.027    |
|                   | O | 1.23184  | -0.20793 | 0.02565  | 114.6413  | 127.4629  | 149.0339  |
|                   | H | -0.8947  | -0.67369 | -0.95115 | 159.1823  | 193.1919  | 217.7496  |
|                   | H | -1.76493 | -1.68302 | 0.3999   | 262.8614  | 317.1896  | 368.5996  |
|                   | C | 2.86417  | 0.5052   | -0.47978 | 380.8505  | 500.9844  | 525.9363  |
|                   | O | 3.92306  | 0.16145  | -0.29515 | 528.5108  | 602.1416  | 974.9359  |
|                   | H | -3.14564 | 0.46317  | -0.22449 | 1140.948  | 1177.57   | 1234.0031 |
|                   | H | -4.43233 | -0.54085 | 0.01836  | 1464.1859 | 1649.3019 | 1650.2052 |
|                   | H | -1.52785 | 2.30429  | 0.08649  | 1665.8144 | 1679.1873 | 1759.3508 |
|                   | H | -0.25085 | 1.30915  | 0.37131  | 2194.137  | 3080.4955 | 3209.219  |
|                   | N | -1.24597 | 1.44869  | 0.55005  | 3431.8591 | 3478.2629 | 3568.4049 |
|                   | N | -4.0244  | 0.13538  | -0.61298 | 3610.5273 | 3618.105  | 3645.4801 |
|                   | H | -3.84526 | -0.32409 | -1.49575 |           |           |           |
|                   | H | -1.35035 | 1.60559  | 1.54558  |           |           |           |
| TS1 <sup>AW</sup> | C | -1.52452 | 1.0128   | -0.19685 | -415.6442 | 36.7194   | 60.368    |
|                   | O | -1.92605 | -0.05139 | -0.78008 | 70.4869   | 104.7295  | 120.7853  |
|                   | O | -0.90645 | -0.97607 | -0.70781 | 150.1445  | 157.0521  | 176.1178  |
|                   | C | -0.59277 | -0.28661 | 1.17237  | 203.1177  | 238.0437  | 262.7538  |
|                   | H | -0.51237 | 1.38155  | -0.33427 | 337.5676  | 462.1026  | 505.5554  |
|                   | H | -2.32384 | 1.68561  | 0.09971  | 555.4739  | 619.8494  | 826.4806  |
|                   | O | 0.18513  | -0.75716 | 1.8446   | 858.035   | 1008.8334 | 1127.1139 |
|                   | H | 1.86361  | 0.84647  | -0.27823 | 1164.2654 | 1236.4309 | 1399.6908 |
|                   | H | 2.17809  | 2.17191  | 0.47889  | 1572.3595 | 1631.1134 | 1669.2853 |
|                   | N | 2.09055  | -0.88701 | -0.82545 | 1675.0241 | 2182.2756 | 3110.0113 |
|                   | H | 2.71456  | -1.13055 | -1.58381 | 3240.4134 | 3359.8895 | 3471.1959 |
|                   | H | 1.13401  | -1.03728 | -1.13949 | 3588.0666 | 3630.8505 | 3935.1438 |
|                   | H | 2.2589   | -1.53877 | -0.0687  |           |           |           |
|                   | O | 1.49199  | 1.71875  | -0.01284 |           |           |           |
| TS2 <sup>AW</sup> | C | 1.15328  | -1.20698 | 0.69506  | -707.556  | 17.1964   | 45.6646   |
|                   | O | 0.27806  | -1.4272  | -0.12037 | 66.8174   | 97.5167   | 129.1533  |

|                  |   |          |          |          |           |           |           |
|------------------|---|----------|----------|----------|-----------|-----------|-----------|
|                  | O | -0.89893 | -0.33018 | -0.07123 | 156.4999  | 163.2751  | 182.3098  |
|                  | H | 1.09809  | -0.33733 | 1.35116  | 196.8578  | 199.9756  | 280.3127  |
|                  | H | 1.97731  | -1.91872 | 0.75775  | 289.3226  | 358.9569  | 412.563   |
|                  | C | -2.57073 | 0.45146  | -0.09857 | 485.4763  | 516.8214  | 542.0109  |
|                  | O | -3.60568 | 0.03052  | -0.24603 | 612.3103  | 679.8695  | 860.3459  |
|                  | H | 2.509    | 0.89156  | -0.32959 | 1181.7611 | 1258.0753 | 1485.2869 |
|                  | H | 2.98098  | -0.38135 | -1.29973 | 1631.8713 | 1635.6604 | 1658.0505 |
|                  | H | 0.54687  | 2.65148  | 0.25247  | 1753.9201 | 2207.4423 | 3072.4392 |
|                  | H | 0.03182  | 1.18386  | 0.18034  | 3196.2361 | 3468.9232 | 3501.8328 |
|                  | N | 3.29141  | 0.33804  | -0.66371 | 3629.9313 | 3676.9339 | 3935.2361 |
|                  | H | 3.81121  | -0.06437 | 0.10169  |           |           |           |
|                  | O | 0.79025  | 1.74457  | 0.44425  |           |           |           |
| RC <sup>AD</sup> | C | 1.78073  | -1.02474 | 0.14969  | 37.1662   | 57.763    | 75.7778   |
|                  | O | 2.15477  | 0.07887  | -0.26984 | 89.508    | 111.7509  | 123.2275  |
|                  | O | 1.22093  | 0.91639  | -0.79363 | 157.9814  | 169.8544  | 183.6363  |
|                  | C | -0.15839 | 0.73117  | 1.56637  | 184.4706  | 194.9005  | 202.9635  |
|                  | H | 0.73389  | -1.33159 | 0.0858   | 218.77    | 262.8951  | 324.9995  |
|                  | H | 2.57455  | -1.63173 | 0.57008  | 337.4327  | 494.7747  | 552.6537  |
|                  | O | -1.12272 | 1.2968   | 1.4618   | 729.8393  | 919.2675  | 1114.5229 |
|                  | H | -1.62351 | -2.84899 | -0.15569 | 1133.788  | 1141.611  | 1271.8549 |
|                  | H | -1.66524 | -1.22552 | -0.38671 | 1470.172  | 1645.8585 | 1651.387  |
|                  | N | -1.33802 | -1.96248 | 0.24246  | 1663.8055 | 1677.4013 | 1692.395  |
|                  | H | -1.84351 | -1.86122 | 1.11443  | 2259.549  | 3043.8781 | 3238.0565 |
|                  | N | -1.69224 | 0.5084   | -1.59736 | 3385.0931 | 3450.2311 | 3560.3604 |
|                  | H | -1.85744 | 0.54965  | -2.59516 | 3579.2886 | 3618.3102 | 3626.9481 |
|                  | H | -0.69469 | 0.65191  | -1.44547 |           |           |           |
|                  | H | -2.17009 | 1.30092  | -1.18601 |           |           |           |
| RC <sup>AW</sup> | C | 1.79285  | -0.74218 | 0.62834  | 50.305    | 60.6255   | 71.5184   |
|                  | O | 2.11321  | -0.01264 | -0.31928 | 79.8505   | 113.4458  | 119.4707  |
|                  | O | 1.14539  | 0.36917  | -1.19487 | 135.1599  | 164.6143  | 170.2885  |
|                  | C | -0.20561 | 1.44975  | 0.99278  | 184.7576  | 199.6471  | 221.861   |
|                  | H | 0.76893  | -1.0924  | 0.74918  | 248.1973  | 270.6973  | 366.7843  |
|                  | H | 2.60994  | -0.99028 | 1.2956   | 546.69    | 581.1101  | 714.3388  |

|                  |   |          |          |          |           |           |           |
|------------------|---|----------|----------|----------|-----------|-----------|-----------|
|                  | O | -1.15487 | 1.92411  | 0.62644  | 842.5554  | 919.8121  | 1110.7576 |
|                  | H | -1.5271  | -1.27227 | 0.21287  | 1140.4754 | 1268.883  | 1467.5987 |
|                  | H | -1.88521 | -1.93325 | 1.58486  | 1627.7882 | 1652.8904 | 1674.0506 |
|                  | N | -1.7278  | -0.4985  | -1.40702 | 1675.1368 | 2261.4459 | 3094.7064 |
|                  | H | -1.96121 | -1.05841 | -2.21697 | 3255.9678 | 3304.4278 | 3437.3799 |
|                  | H | -0.75063 | -0.21623 | -1.49025 | 3577.4715 | 3631.5727 | 3935.9468 |
|                  | H | -2.29064 | 0.34219  | -1.44423 |           |           |           |
|                  | O | -1.15284 | -1.59755 | 1.06663  |           |           |           |
| PC <sup>AD</sup> | C | -1.99284 | -0.95181 | -0.3802  | 46.5115   | 64.7874   | 76.0621   |
|                  | O | -2.36204 | 0.13803  | -0.03474 | 79.1251   | 93.1057   | 101.3167  |
|                  | O | 0.69712  | -0.95809 | -1.12049 | 112.9127  | 131.7384  | 139.5558  |
|                  | C | 1.55661  | -0.57109 | -0.44705 | 153.2451  | 171.9815  | 190.8261  |
|                  | H | -1.54479 | -1.66003 | 0.33059  | 213.9823  | 231.4961  | 279.347   |
|                  | H | -2.08116 | -1.28127 | -1.42758 | 354.9995  | 404.754   | 679.6052  |
|                  | O | 2.45551  | -0.20966 | 0.17855  | 684.4813  | 1094.9094 | 1101.4528 |
|                  | H | -0.95444 | -0.09349 | 2.24263  | 1224.1684 | 1282.6898 | 1407.0993 |
|                  | H | 0.15407  | 0.67736  | 1.33746  | 1543.4243 | 1640.9424 | 1651.6076 |
|                  | N | -0.00665 | -0.16049 | 1.89093  | 1661.8498 | 1676.4634 | 1847.7331 |
|                  | H | 0.62177  | -0.12851 | 2.68379  | 2436.3015 | 2977.2762 | 3068.8986 |
|                  | N | 0.07791  | 2.02864  | -0.50073 | 3472.0503 | 3490.1192 | 3587.5717 |
|                  | H | 0.14058  | 2.98238  | -0.16637 | 3605.1395 | 3623.7131 | 3627.3616 |
|                  | H | -0.90149 | 1.76135  | -0.48105 |           |           |           |
|                  | H | 0.35931  | 2.04023  | -1.47381 |           |           |           |
| PC <sup>AW</sup> | C | -1.28703 | -1.53376 | 0.41147  | 8.8431    | 28.7453   | 41.417    |
|                  | O | -2.32918 | -1.43198 | -0.18061 | 65.8084   | 106.7717  | 119.5387  |
|                  | O | 1.57112  | -1.2177  | -0.22399 | 136.7998  | 151.1066  | 164.8309  |
|                  | C | 2.26816  | -0.29623 | -0.16802 | 187.2989  | 210.5811  | 241.5312  |
|                  | H | -0.78374 | -0.66414 | 0.85888  | 252.962   | 260.3174  | 378.1443  |
|                  | H | -0.78773 | -2.5086  | 0.5217   | 565.7562  | 673.5011  | 698.8074  |
|                  | O | 3.01446  | 0.58339  | -0.1234  | 816.5955  | 1137.4076 | 1233.5213 |
|                  | H | -0.61191 | 1.56873  | 0.20557  | 1281.8643 | 1408.9769 | 1547.6042 |
|                  | H | 0.76383  | 2.21732  | 0.54504  | 1641.4003 | 1673.9813 | 1676.0591 |
|                  | N | -2.3979  | 1.60407  | -0.2793  | 1842.5054 | 2439.2928 | 2979.3359 |

|                   |   |          |          |          |           |           |           |
|-------------------|---|----------|----------|----------|-----------|-----------|-----------|
|                   | H | -3.03195 | 2.05355  | 0.36937  | 3074.4549 | 3389.4059 | 3461.4021 |
|                   | H | -2.65427 | 0.61962  | -0.3296  | 3581.5715 | 3626.0731 | 3924.3587 |
|                   | H | -2.56848 | 2.00764  | -1.19207 |           |           |           |
|                   | O | 0.31518  | 1.37346  | 0.46743  |           |           |           |
| AD-CI             | C | 0.54314  | -1.17433 | 0.48282  | 25.8083   | 70.354    | 107.3503  |
|                   | O | 1.41319  | -0.74159 | -0.32128 | 121.5981  | 134.0678  | 163.4395  |
|                   | O | 1.93474  | 0.50414  | -0.12338 | 189.4009  | 197.0742  | 222.3141  |
|                   | H | 0.22765  | -0.55739 | 1.31714  | 306.2432  | 366.4305  | 472.3107  |
|                   | H | 0.1876   | -2.17867 | 0.28475  | 535.0196  | 691.5261  | 893.2479  |
|                   | H | -1.94489 | 0.12155  | -0.03183 | 968.2758  | 1054.9786 | 1131.8687 |
|                   | H | -2.02821 | -1.24788 | -0.96956 | 1255.7353 | 1440.1172 | 1646.5231 |
|                   | N | -0.73445 | 1.83672  | 0.1089   | 1649.6306 | 1654.6903 | 1666.0183 |
|                   | H | -1.03838 | 2.34792  | -0.71893 | 1682.6655 | 3149.2106 | 3295.0145 |
|                   | H | 0.26072  | 1.62252  | -0.02295 | 3421.4099 | 3455.1504 | 3568.0324 |
|                   | H | -0.79391 | 2.4965   | 0.88357  | 3599.938  | 3620.427  | 3647.6744 |
|                   | N | -2.47512 | -0.74112 | -0.20929 |           |           |           |
|                   | H | -2.44587 | -1.32811 | 0.62084  |           |           |           |
| AW-CI             | C | 0.96046  | 1.10044  | -0.26507 | 44.7271   | 63.2208   | 145.0964  |
|                   | O | 1.44975  | 0.19297  | 0.41132  | 188.1944  | 200.5158  | 229.437   |
|                   | O | 1.44164  | -1.07512 | -0.13779 | 238.5889  | 262.9622  | 286.8471  |
|                   | H | 0.57555  | 0.87943  | -1.25312 | 456.5974  | 528.9997  | 588.141   |
|                   | H | 0.97272  | 2.08807  | 0.17339  | 727.0743  | 869.5983  | 903.8064  |
|                   | H | -1.65677 | 0.35477  | 0.02532  | 1096.2569 | 1181.7452 | 1250.9185 |
|                   | H | -2.16512 | 1.7183   | 0.59893  | 1443.9922 | 1641.1449 | 1672.2724 |
|                   | N | -1.45908 | -1.42273 | 0.00897  | 1672.8913 | 1682.9458 | 3156.2369 |
|                   | H | -1.76826 | -1.93124 | 0.82793  | 3216.2016 | 3301.4804 | 3348.2581 |
|                   | H | -0.43915 | -1.51495 | -0.0449  | 3562.3567 | 3627.0299 | 3926.6606 |
|                   | H | -1.85448 | -1.88951 | -0.79767 |           |           |           |
|                   | O | -1.5431  | 1.3386   | -0.02382 |           |           |           |
| TS3 <sup>AD</sup> | O | -0.4514  | -1.14617 | -0.41939 | -457.9353 | 49.461    | 62.5316   |
|                   | O | -1.62415 | -0.5407  | -0.85078 | 76.6883   | 124.7415  | 152.3065  |
|                   | C | -1.57986 | 0.70309  | -0.60581 | 162.5104  | 175.847   | 182.0872  |



|                   |   |           |           |           |           |           |           |
|-------------------|---|-----------|-----------|-----------|-----------|-----------|-----------|
|                   | H | -0.63166  | 1.24293   | -0.63432  | 238.5255  | 257.5119  | 269.4003  |
|                   | H | -2.55081  | 1.18535   | -0.63144  | 335.0728  | 358.6645  | 447.0959  |
|                   | O | -1.02863  | 0.27257   | 1.36148   | 464.7283  | 584.1387  | 720.2909  |
|                   | C | -0.32483  | -0.66519  | 1.23498   | 808.682   | 980.5137  | 1095.4389 |
|                   | H | 3.42839   | -1.42626  | -0.28984  | 1143.8996 | 1186.3651 | 1266.2615 |
|                   | H | 1.90057   | -1.34077  | -0.87433  | 1430.827  | 1578.3327 | 1641.6414 |
|                   | H | 1.84725   | 1.06879   | -0.21091  | 1654.1946 | 1663.9697 | 1689.9075 |
|                   | N | 2.5287    | -0.97974  | -0.16513  | 1829.5942 | 3039.1503 | 3239.8587 |
|                   | H | 2.14766   | -1.29343  | 0.7211    | 3407.6641 | 3495.3173 | 3561.2514 |
|                   | N | 1.32161   | 1.94513   | -0.20616  | 3605.6399 | 3618.5486 | 3628.4583 |
|                   | H | 1.85667   | 2.61949   | -0.73944  |           |           |           |
|                   | H | 1.31139   | 2.2731    | 0.75274   |           |           |           |
| TS3 <sup>AW</sup> | O | -0.438965 | -0.997095 | -0.640343 | -457.4872 | 54.2715   | 58.0861   |
|                   | O | -1.571763 | -0.26731  | -0.971598 | 78.9549   | 125.2742  | 137.3359  |
|                   | C | -1.519755 | 0.874096  | -0.419319 | 173.2069  | 175.8595  | 230.0808  |
|                   | H | -0.56304  | 1.371522  | -0.276312 | 267.836   | 284.3197  | 313.6669  |
|                   | H | -2.476642 | 1.381344  | -0.374477 | 363.091   | 459.7525  | 529.5397  |
|                   | O | -1.112634 | -0.03919  | 1.398981  | 585.7662  | 717.7675  | 804.3276  |
|                   | C | -0.413955 | -0.937967 | 1.09387   | 819.8656  | 984.5723  | 1123.0935 |
|                   | H | 1.957661  | -1.137015 | -0.997027 | 1168.321  | 1266.4056 | 1429.4294 |
|                   | H | 2.079293  | -1.336376 | 0.604893  | 1575.8263 | 1633.0012 | 1658.0499 |
|                   | O | 1.392146  | 1.776249  | -0.03832  | 1672.4219 | 1834.6601 | 3097.1256 |
|                   | H | 1.849894  | 2.309583  | 0.613329  | 3258.3718 | 3380.0857 | 3494.8392 |
|                   | H | 1.861783  | 0.911773  | -0.059651 | 3603.5662 | 3629.4716 | 3930.1598 |
|                   | N | 2.472122  | -0.827255 | -0.179826 |           |           |           |
|                   | H | 3.438178  | -1.108048 | -0.289041 |           |           |           |

Table S2: Bimolecular rate constant  $k_b$  in ( $\text{cm}^3 \text{ molecule}^{-1} \text{ sec}^{-1}$ ) for AM catalyzed channel corresponds to TS1 within temperature range 213-1000 K

| Temp (K) | path A                 | path B                 | path C                 | total                  |
|----------|------------------------|------------------------|------------------------|------------------------|
| 213      | $3.51 \times 10^{-21}$ | $4.92 \times 10^{-24}$ | $2.72 \times 10^{-22}$ | $3.79 \times 10^{-21}$ |
| 216      | $4.25 \times 10^{-21}$ | $6.71 \times 10^{-24}$ | $3.14 \times 10^{-22}$ | $4.57 \times 10^{-21}$ |
| 219      | $5.12 \times 10^{-21}$ | $9.09 \times 10^{-24}$ | $3.62 \times 10^{-22}$ | $5.49 \times 10^{-21}$ |
| 224      | $6.90 \times 10^{-21}$ | $1.48 \times 10^{-23}$ | $4.56 \times 10^{-22}$ | $7.37 \times 10^{-21}$ |
| 235      | $1.28 \times 10^{-20}$ | $4.02 \times 10^{-23}$ | $7.33 \times 10^{-22}$ | $1.35 \times 10^{-20}$ |
| 250      | $2.73 \times 10^{-20}$ | $1.38 \times 10^{-22}$ | $1.32 \times 10^{-21}$ | $2.87 \times 10^{-20}$ |
| 259      | $4.13 \times 10^{-20}$ | $2.69 \times 10^{-22}$ | $1.83 \times 10^{-21}$ | $4.34 \times 10^{-20}$ |
| 265      | $5.37 \times 10^{-20}$ | $4.12 \times 10^{-22}$ | $2.24 \times 10^{-21}$ | $5.63 \times 10^{-20}$ |
| 278      | $9.14 \times 10^{-20}$ | $9.72 \times 10^{-22}$ | $3.41 \times 10^{-21}$ | $9.58 \times 10^{-20}$ |
| 280      | $9.89 \times 10^{-20}$ | $1.10 \times 10^{-21}$ | $3.63 \times 10^{-21}$ | $1.04 \times 10^{-19}$ |
| 290      | $1.44 \times 10^{-19}$ | $2.01 \times 10^{-21}$ | $4.88 \times 10^{-21}$ | $1.51 \times 10^{-19}$ |
| 298      | $1.91 \times 10^{-19}$ | $3.17 \times 10^{-21}$ | $6.12 \times 10^{-21}$ | $2.00 \times 10^{-19}$ |
| 300      | $2.04 \times 10^{-19}$ | $3.54 \times 10^{-21}$ | $6.46 \times 10^{-21}$ | $2.14 \times 10^{-19}$ |
| 310      | $2.85 \times 10^{-19}$ | $6.01 \times 10^{-21}$ | $8.42 \times 10^{-21}$ | $2.99 \times 10^{-19}$ |
| 320      | $3.89 \times 10^{-19}$ | $9.89 \times 10^{-21}$ | $1.08 \times 10^{-20}$ | $4.10 \times 10^{-19}$ |
| 330      | $5.22 \times 10^{-19}$ | $1.58 \times 10^{-20}$ | $1.37 \times 10^{-20}$ | $5.52 \times 10^{-19}$ |
| 350      | $9.00 \times 10^{-19}$ | $3.76 \times 10^{-20}$ | $2.14 \times 10^{-20}$ | $9.59 \times 10^{-19}$ |
| 375      | $1.65 \times 10^{-18}$ | $9.79 \times 10^{-20}$ | $3.52 \times 10^{-20}$ | $1.79 \times 10^{-18}$ |
| 400      | $2.84 \times 10^{-18}$ | $2.28 \times 10^{-19}$ | $5.52 \times 10^{-20}$ | $3.12 \times 10^{-18}$ |
| 425      | $4.61 \times 10^{-18}$ | $4.85 \times 10^{-19}$ | $8.30 \times 10^{-20}$ | $5.18 \times 10^{-18}$ |
| 450      | $7.14 \times 10^{-18}$ | $9.54 \times 10^{-19}$ | $1.20 \times 10^{-19}$ | $8.21 \times 10^{-18}$ |
| 475      | $1.06 \times 10^{-17}$ | $1.76 \times 10^{-18}$ | $1.70 \times 10^{-19}$ | $1.26 \times 10^{-17}$ |
| 500      | $1.53 \times 10^{-17}$ | $3.07 \times 10^{-18}$ | $2.33 \times 10^{-19}$ | $1.86 \times 10^{-17}$ |
| 550      | $2.92 \times 10^{-17}$ | $8.12 \times 10^{-18}$ | $4.11 \times 10^{-19}$ | $3.77 \times 10^{-17}$ |
| 600      | $5.10 \times 10^{-17}$ | $1.86 \times 10^{-17}$ | $6.78 \times 10^{-19}$ | $7.02 \times 10^{-17}$ |
| 650      | $8.30 \times 10^{-17}$ | $3.79 \times 10^{-17}$ | $1.06 \times 10^{-18}$ | $1.22 \times 10^{-16}$ |
| 700      | $1.28 \times 10^{-16}$ | $7.09 \times 10^{-17}$ | $1.58 \times 10^{-18}$ | $2.00 \times 10^{-16}$ |
| 750      | $1.88 \times 10^{-16}$ | $1.23 \times 10^{-16}$ | $2.28 \times 10^{-18}$ | $3.14 \times 10^{-16}$ |
| 800      | $2.67 \times 10^{-16}$ | $2.02 \times 10^{-16}$ | $3.19 \times 10^{-18}$ | $4.72 \times 10^{-16}$ |
| 850      | $3.67 \times 10^{-16}$ | $3.14 \times 10^{-16}$ | $4.34 \times 10^{-18}$ | $6.86 \times 10^{-16}$ |
| 900      | $4.92 \times 10^{-16}$ | $4.69 \times 10^{-16}$ | $5.78 \times 10^{-18}$ | $9.68 \times 10^{-16}$ |
| 950      | $6.45 \times 10^{-16}$ | $6.77 \times 10^{-16}$ | $7.56 \times 10^{-18}$ | $1.33 \times 10^{-15}$ |
| 1000     | $8.29 \times 10^{-16}$ | $9.49 \times 10^{-16}$ | $9.72 \times 10^{-18}$ | $1.79 \times 10^{-15}$ |

Table S3: Bimolecular rate constant  $k_b$  in ( $\text{cm}^3 \text{ molecule}^{-1} \text{ sec}^{-1}$ ) for AM catalyzed channel corresponds to TS2 within temperature range 213-1000 K

| Temp (K) | path A                 | path B                 | path C                 | total                  |
|----------|------------------------|------------------------|------------------------|------------------------|
| 213      | $2.65 \times 10^{-20}$ | $3.71 \times 10^{-23}$ | $2.05 \times 10^{-21}$ | $2.85 \times 10^{-20}$ |
| 216      | $3.18 \times 10^{-20}$ | $5.03 \times 10^{-23}$ | $2.36 \times 10^{-21}$ | $3.43 \times 10^{-20}$ |
| 219      | $3.82 \times 10^{-20}$ | $6.79 \times 10^{-23}$ | $2.71 \times 10^{-21}$ | $4.10 \times 10^{-20}$ |
| 224      | $5.14 \times 10^{-20}$ | $1.10 \times 10^{-22}$ | $3.40 \times 10^{-21}$ | $5.49 \times 10^{-20}$ |
| 235      | $9.54 \times 10^{-20}$ | $3.00 \times 10^{-22}$ | $5.47 \times 10^{-21}$ | $1.01 \times 10^{-19}$ |
| 250      | $2.07 \times 10^{-19}$ | $1.05 \times 10^{-21}$ | $1.00 \times 10^{-20}$ | $2.18 \times 10^{-19}$ |
| 259      | $3.19 \times 10^{-19}$ | $2.08 \times 10^{-21}$ | $1.41 \times 10^{-20}$ | $3.35 \times 10^{-19}$ |
| 265      | $4.19 \times 10^{-19}$ | $3.21 \times 10^{-21}$ | $1.75 \times 10^{-20}$ | $4.40 \times 10^{-19}$ |
| 278      | $7.35 \times 10^{-19}$ | $7.81 \times 10^{-21}$ | $2.74 \times 10^{-20}$ | $7.70 \times 10^{-19}$ |
| 280      | $7.99 \times 10^{-19}$ | $8.90 \times 10^{-21}$ | $2.93 \times 10^{-20}$ | $8.37 \times 10^{-19}$ |
| 290      | $1.19 \times 10^{-18}$ | $1.67 \times 10^{-20}$ | $4.04 \times 10^{-20}$ | $1.25 \times 10^{-18}$ |
| 298      | $1.61 \times 10^{-18}$ | $2.68 \times 10^{-20}$ | $5.17 \times 10^{-20}$ | $1.69 \times 10^{-18}$ |
| 300      | $1.74 \times 10^{-18}$ | $3.01 \times 10^{-20}$ | $5.49 \times 10^{-20}$ | $1.82 \times 10^{-18}$ |
| 310      | $2.48 \times 10^{-18}$ | $5.24 \times 10^{-20}$ | $7.35 \times 10^{-20}$ | $2.61 \times 10^{-18}$ |
| 320      | $3.49 \times 10^{-18}$ | $8.87 \times 10^{-20}$ | $9.70 \times 10^{-20}$ | $3.67 \times 10^{-18}$ |
| 330      | $4.81 \times 10^{-18}$ | $1.46 \times 10^{-19}$ | $1.26 \times 10^{-19}$ | $5.08 \times 10^{-18}$ |
| 350      | $8.76 \times 10^{-18}$ | $3.65 \times 10^{-19}$ | $2.08 \times 10^{-19}$ | $9.33 \times 10^{-18}$ |
| 375      | $1.72 \times 10^{-17}$ | $1.02 \times 10^{-18}$ | $3.66 \times 10^{-19}$ | $1.86 \times 10^{-17}$ |
| 400      | $3.14 \times 10^{-17}$ | $2.53 \times 10^{-18}$ | $6.12 \times 10^{-19}$ | $3.46 \times 10^{-17}$ |
| 425      | $5.42 \times 10^{-17}$ | $5.71 \times 10^{-18}$ | $9.77 \times 10^{-19}$ | $6.09 \times 10^{-17}$ |
| 450      | $8.89 \times 10^{-17}$ | $1.19 \times 10^{-17}$ | $1.50 \times 10^{-18}$ | $1.02 \times 10^{-16}$ |
| 475      | $1.40 \times 10^{-16}$ | $2.31 \times 10^{-17}$ | $2.23 \times 10^{-18}$ | $1.65 \times 10^{-16}$ |
| 500      | $2.12 \times 10^{-16}$ | $4.24 \times 10^{-17}$ | $3.22 \times 10^{-18}$ | $2.57 \times 10^{-16}$ |
| 550      | $4.43 \times 10^{-16}$ | $1.23 \times 10^{-16}$ | $6.24 \times 10^{-18}$ | $5.73 \times 10^{-16}$ |
| 600      | $8.40 \times 10^{-16}$ | $3.06 \times 10^{-16}$ | $1.12 \times 10^{-17}$ | $1.16 \times 10^{-15}$ |
| 650      | $1.47 \times 10^{-15}$ | $6.72 \times 10^{-16}$ | $1.88 \times 10^{-17}$ | $2.16 \times 10^{-15}$ |
| 700      | $2.41 \times 10^{-15}$ | $1.34 \times 10^{-15}$ | $2.99 \times 10^{-17}$ | $3.78 \times 10^{-15}$ |
| 750      | $3.76 \times 10^{-15}$ | $2.46 \times 10^{-15}$ | $4.56 \times 10^{-17}$ | $6.27 \times 10^{-15}$ |
| 800      | $5.63 \times 10^{-15}$ | $4.24 \times 10^{-15}$ | $6.71 \times 10^{-17}$ | $9.93 \times 10^{-15}$ |
| 850      | $8.10 \times 10^{-15}$ | $6.92 \times 10^{-15}$ | $9.57 \times 10^{-17}$ | $1.51 \times 10^{-14}$ |
| 900      | $1.13 \times 10^{-14}$ | $1.08 \times 10^{-14}$ | $1.33 \times 10^{-16}$ | $2.23 \times 10^{-14}$ |
| 950      | $1.54 \times 10^{-14}$ | $1.62 \times 10^{-14}$ | $1.81 \times 10^{-16}$ | $3.18 \times 10^{-14}$ |
| 1000     | $2.05 \times 10^{-14}$ | $2.35 \times 10^{-14}$ | $2.40 \times 10^{-16}$ | $4.42 \times 10^{-14}$ |

Table S4: Bimolecular rate constant  $k_b$  in ( $\text{cm}^3 \text{ molecule}^{-1} \text{ sec}^{-1}$ ) for AM catalyzed channel corresponds to TS3, within temperature range 213-1000 K

| Temp (K) | path A                 | path B                 | path C                 | total                  |
|----------|------------------------|------------------------|------------------------|------------------------|
| 213      | $4.27 \times 10^{-24}$ | $5.98 \times 10^{-27}$ | $3.30 \times 10^{-25}$ | $4.60 \times 10^{-24}$ |
| 216      | $5.60 \times 10^{-24}$ | $8.85 \times 10^{-27}$ | $4.14 \times 10^{-25}$ | $6.03 \times 10^{-24}$ |
| 219      | $7.31 \times 10^{-24}$ | $1.30 \times 10^{-26}$ | $5.18 \times 10^{-25}$ | $7.84 \times 10^{-24}$ |
| 224      | $1.12 \times 10^{-23}$ | $2.40 \times 10^{-26}$ | $7.41 \times 10^{-25}$ | $1.20 \times 10^{-23}$ |
| 235      | $2.70 \times 10^{-23}$ | $8.51 \times 10^{-26}$ | $1.55 \times 10^{-24}$ | $2.87 \times 10^{-23}$ |
| 250      | $7.96 \times 10^{-23}$ | $4.02 \times 10^{-25}$ | $3.86 \times 10^{-24}$ | $8.38 \times 10^{-23}$ |
| 259      | $1.44 \times 10^{-22}$ | $9.37 \times 10^{-25}$ | $6.35 \times 10^{-24}$ | $1.51 \times 10^{-22}$ |
| 265      | $2.09 \times 10^{-22}$ | $1.60 \times 10^{-24}$ | $8.71 \times 10^{-24}$ | $2.19 \times 10^{-22}$ |
| 278      | $4.43 \times 10^{-22}$ | $4.71 \times 10^{-24}$ | $1.65 \times 10^{-23}$ | $4.65 \times 10^{-22}$ |
| 280      | $4.95 \times 10^{-22}$ | $5.52 \times 10^{-24}$ | $1.82 \times 10^{-23}$ | $5.19 \times 10^{-22}$ |
| 290      | $8.41 \times 10^{-22}$ | $1.18 \times 10^{-23}$ | $2.85 \times 10^{-23}$ | $8.81 \times 10^{-22}$ |
| 298      | $1.25 \times 10^{-21}$ | $2.08 \times 10^{-23}$ | $4.01 \times 10^{-23}$ | $1.31 \times 10^{-21}$ |
| 300      | $1.38 \times 10^{-21}$ | $2.39 \times 10^{-23}$ | $4.36 \times 10^{-23}$ | $1.45 \times 10^{-21}$ |
| 310      | $2.20 \times 10^{-21}$ | $4.64 \times 10^{-23}$ | $6.51 \times 10^{-23}$ | $2.31 \times 10^{-21}$ |
| 320      | $3.41 \times 10^{-21}$ | $8.68 \times 10^{-23}$ | $9.48 \times 10^{-23}$ | $3.59 \times 10^{-21}$ |
| 330      | $5.16 \times 10^{-21}$ | $1.56 \times 10^{-22}$ | $1.35 \times 10^{-22}$ | $5.45 \times 10^{-21}$ |
| 350      | $1.10 \times 10^{-20}$ | $4.60 \times 10^{-22}$ | $2.62 \times 10^{-22}$ | $1.18 \times 10^{-20}$ |
| 375      | $2.57 \times 10^{-20}$ | $1.52 \times 10^{-21}$ | $5.48 \times 10^{-22}$ | $2.78 \times 10^{-20}$ |
| 400      | $5.43 \times 10^{-20}$ | $4.37 \times 10^{-21}$ | $1.06 \times 10^{-21}$ | $5.97 \times 10^{-20}$ |
| 425      | $1.06 \times 10^{-19}$ | $1.11 \times 10^{-20}$ | $1.91 \times 10^{-21}$ | $1.19 \times 10^{-19}$ |
| 450      | $1.93 \times 10^{-19}$ | $2.58 \times 10^{-20}$ | $3.25 \times 10^{-21}$ | $2.22 \times 10^{-19}$ |
| 475      | $3.32 \times 10^{-19}$ | $5.49 \times 10^{-20}$ | $5.30 \times 10^{-21}$ | $3.92 \times 10^{-19}$ |
| 500      | $5.44 \times 10^{-19}$ | $1.09 \times 10^{-19}$ | $8.28 \times 10^{-21}$ | $6.61 \times 10^{-19}$ |
| 550      | $1.30 \times 10^{-18}$ | $3.62 \times 10^{-19}$ | $1.83 \times 10^{-20}$ | $1.68 \times 10^{-18}$ |
| 600      | $2.74 \times 10^{-18}$ | $9.98 \times 10^{-19}$ | $3.65 \times 10^{-20}$ | $3.77 \times 10^{-18}$ |
| 650      | $5.23 \times 10^{-18}$ | $2.39 \times 10^{-18}$ | $6.67 \times 10^{-20}$ | $7.69 \times 10^{-18}$ |
| 700      | $9.23 \times 10^{-18}$ | $5.12 \times 10^{-18}$ | $1.14 \times 10^{-19}$ | $1.45 \times 10^{-17}$ |
| 750      | $1.53 \times 10^{-17}$ | $1.00 \times 10^{-17}$ | $1.85 \times 10^{-19}$ | $2.55 \times 10^{-17}$ |
| 800      | $2.41 \times 10^{-17}$ | $1.82 \times 10^{-17}$ | $2.87 \times 10^{-19}$ | $4.26 \times 10^{-17}$ |
| 850      | $3.63 \times 10^{-17}$ | $3.11 \times 10^{-17}$ | $4.29 \times 10^{-19}$ | $6.78 \times 10^{-17}$ |
| 900      | $5.29 \times 10^{-17}$ | $5.04 \times 10^{-17}$ | $6.21 \times 10^{-19}$ | $1.04 \times 10^{-16}$ |
| 950      | $7.46 \times 10^{-17}$ | $7.83 \times 10^{-17}$ | $8.73 \times 10^{-19}$ | $1.54 \times 10^{-16}$ |
| 1000     | $1.02 \times 10^{-16}$ | $1.17 \times 10^{-16}$ | $1.20 \times 10^{-18}$ | $2.21 \times 10^{-16}$ |

Table S5: Bimolecular rate constant  $k_b$  in ( $\text{cm}^3 \text{ molecule}^{-1} \text{ sec}^{-1}$ ) for AM catalyzed channel corresponds to TS2', within temperature range 213-1000 K

| Temp (K) | path A                 | path B                 | path C                 | total                  |
|----------|------------------------|------------------------|------------------------|------------------------|
| 213      | $4.32 \times 10^{-17}$ | $6.05 \times 10^{-20}$ | $3.34 \times 10^{-18}$ | $4.66 \times 10^{-17}$ |
| 216      | $4.29 \times 10^{-17}$ | $6.77 \times 10^{-20}$ | $3.17 \times 10^{-18}$ | $4.61 \times 10^{-17}$ |
| 219      | $4.26 \times 10^{-17}$ | $7.56 \times 10^{-20}$ | $3.02 \times 10^{-18}$ | $4.57 \times 10^{-17}$ |
| 224      | $4.21 \times 10^{-17}$ | $9.02 \times 10^{-20}$ | $2.78 \times 10^{-18}$ | $4.50 \times 10^{-17}$ |
| 235      | $4.10 \times 10^{-17}$ | $1.29 \times 10^{-19}$ | $2.35 \times 10^{-18}$ | $4.35 \times 10^{-17}$ |
| 250      | $3.95 \times 10^{-17}$ | $2.00 \times 10^{-19}$ | $1.92 \times 10^{-18}$ | $4.17 \times 10^{-17}$ |
| 259      | $3.87 \times 10^{-17}$ | $2.52 \times 10^{-19}$ | $1.71 \times 10^{-18}$ | $4.06 \times 10^{-17}$ |
| 265      | $3.81 \times 10^{-17}$ | $2.92 \times 10^{-19}$ | $1.59 \times 10^{-18}$ | $4.00 \times 10^{-17}$ |
| 278      | $3.69 \times 10^{-17}$ | $3.93 \times 10^{-19}$ | $1.38 \times 10^{-18}$ | $3.87 \times 10^{-17}$ |
| 280      | $3.68 \times 10^{-17}$ | $4.10 \times 10^{-19}$ | $1.35 \times 10^{-18}$ | $3.85 \times 10^{-17}$ |
| 290      | $3.59 \times 10^{-17}$ | $5.02 \times 10^{-19}$ | $1.22 \times 10^{-18}$ | $3.76 \times 10^{-17}$ |
| 298      | $3.52 \times 10^{-17}$ | $5.85 \times 10^{-19}$ | $1.13 \times 10^{-18}$ | $3.69 \times 10^{-17}$ |
| 300      | $3.51 \times 10^{-17}$ | $6.07 \times 10^{-19}$ | $1.11 \times 10^{-18}$ | $3.68 \times 10^{-17}$ |
| 310      | $3.43 \times 10^{-17}$ | $7.24 \times 10^{-19}$ | $1.01 \times 10^{-18}$ | $3.60 \times 10^{-17}$ |
| 320      | $3.35 \times 10^{-17}$ | $8.53 \times 10^{-19}$ | $9.33 \times 10^{-19}$ | $3.53 \times 10^{-17}$ |
| 330      | $3.28 \times 10^{-17}$ | $9.94 \times 10^{-19}$ | $8.62 \times 10^{-19}$ | $3.47 \times 10^{-17}$ |
| 350      | $3.15 \times 10^{-17}$ | $1.31 \times 10^{-18}$ | $7.48 \times 10^{-19}$ | $3.36 \times 10^{-17}$ |
| 375      | $3.01 \times 10^{-17}$ | $1.78 \times 10^{-18}$ | $6.41 \times 10^{-19}$ | $3.25 \times 10^{-17}$ |
| 400      | $2.89 \times 10^{-17}$ | $2.32 \times 10^{-18}$ | $5.62 \times 10^{-19}$ | $3.17 \times 10^{-17}$ |
| 425      | $2.78 \times 10^{-17}$ | $2.93 \times 10^{-18}$ | $5.01 \times 10^{-19}$ | $3.13 \times 10^{-17}$ |
| 450      | $2.69 \times 10^{-17}$ | $3.60 \times 10^{-18}$ | $4.55 \times 10^{-19}$ | $3.10 \times 10^{-17}$ |
| 475      | $2.62 \times 10^{-17}$ | $4.34 \times 10^{-18}$ | $4.18 \times 10^{-19}$ | $3.10 \times 10^{-17}$ |
| 500      | $2.56 \times 10^{-17}$ | $5.13 \times 10^{-18}$ | $3.90 \times 10^{-19}$ | $3.11 \times 10^{-17}$ |
| 550      | $2.47 \times 10^{-17}$ | $6.87 \times 10^{-18}$ | $3.48 \times 10^{-19}$ | $3.20 \times 10^{-17}$ |
| 600      | $2.42 \times 10^{-17}$ | $8.82 \times 10^{-18}$ | $3.22 \times 10^{-19}$ | $3.34 \times 10^{-17}$ |
| 650      | $2.40 \times 10^{-17}$ | $1.10 \times 10^{-17}$ | $3.06 \times 10^{-19}$ | $3.53 \times 10^{-17}$ |
| 700      | $2.31 \times 10^{-17}$ | $1.28 \times 10^{-17}$ | $2.86 \times 10^{-19}$ | $3.62 \times 10^{-17}$ |
| 750      | $2.42 \times 10^{-17}$ | $1.58 \times 10^{-17}$ | $2.93 \times 10^{-19}$ | $4.03 \times 10^{-17}$ |
| 800      | $2.46 \times 10^{-17}$ | $1.85 \times 10^{-17}$ | $2.93 \times 10^{-19}$ | $4.34 \times 10^{-17}$ |
| 850      | $2.51 \times 10^{-17}$ | $2.14 \times 10^{-17}$ | $2.96 \times 10^{-19}$ | $4.68 \times 10^{-17}$ |
| 900      | $2.58 \times 10^{-17}$ | $2.45 \times 10^{-17}$ | $3.02 \times 10^{-19}$ | $5.06 \times 10^{-17}$ |
| 950      | $2.65 \times 10^{-17}$ | $2.79 \times 10^{-17}$ | $3.11 \times 10^{-19}$ | $5.47 \times 10^{-17}$ |
| 1000     | $2.75 \times 10^{-17}$ | $3.14 \times 10^{-17}$ | $3.22 \times 10^{-19}$ | $5.92 \times 10^{-17}$ |

Table S6: Relative energies ( $\Delta E$ ) including ZPE in kcal mol<sup>-1</sup> for all the species with respect to the isolated reactants at the CCSD(T)/aug-cc-pVTZ level of theory in the presence of AM as a catalyst.

| Species             | $\Delta E$ |
|---------------------|------------|
| CI-CO               | -1.48      |
| PC <sub>uncat</sub> | -121.43    |
| RC <sub>cat</sub>   | -6.98      |
| TS1 <sub>cat</sub>  | 4.69       |
| TS2 <sub>cat</sub>  | 4.99       |
| TS3 <sub>cat</sub>  | 7.42       |
| PC <sub>cat</sub>   | -123.25    |
| Product             | -119.22    |
| CI-AM               | -4.94      |
| AM-CO               | -0.41      |

Table S7: Concentration of different bimolecular species in molecules cm<sup>-3</sup>, calculated using the  $k_{eq1}$  values of path A, B, and C for AM catalyzed channel

| Temp (K) | $k_{eq1}^{pathA}$      | $k_{eq1}^{pathB}$      | $k_{eq1}^{pathC}$      | [CI]               | [CO]                  | [AM]                  | [CI-CO]               | [CI-AM]               | [AM-CO]            |
|----------|------------------------|------------------------|------------------------|--------------------|-----------------------|-----------------------|-----------------------|-----------------------|--------------------|
| 280      | $1.29 \times 10^{-24}$ | $1.16 \times 10^{-22}$ | $3.52 \times 10^{-23}$ | $5.00 \times 10^4$ | $1.00 \times 10^{13}$ | $2.62 \times 10^{11}$ | $6.46 \times 10^{-7}$ | $1.52 \times 10^{-6}$ | $9.22 \times 10^1$ |
| 290      | $1.21 \times 10^{-24}$ | $8.63 \times 10^{-23}$ | $3.56 \times 10^{-23}$ | $5.00 \times 10^4$ | $1.00 \times 10^{13}$ | $2.53 \times 10^{11}$ | $6.04 \times 10^{-7}$ | $1.09 \times 10^{-6}$ | $9.00 \times 10^1$ |
| 298      | $1.15 \times 10^{-24}$ | $6.93 \times 10^{-23}$ | $3.59 \times 10^{-23}$ | $5.00 \times 10^4$ | $1.00 \times 10^{13}$ | $2.46 \times 10^{11}$ | $5.76 \times 10^{-7}$ | $8.52 \times 10^{-7}$ | $8.83 \times 10^1$ |
| 300      | $1.14 \times 10^{-24}$ | $6.57 \times 10^{-23}$ | $3.60 \times 10^{-23}$ | $5.00 \times 10^4$ | $1.00 \times 10^{13}$ | $2.44 \times 10^{11}$ | $5.69 \times 10^{-7}$ | $8.02 \times 10^{-7}$ | $8.78 \times 10^1$ |
| 310      | $1.08 \times 10^{-24}$ | $5.11 \times 10^{-23}$ | $3.65 \times 10^{-23}$ | $5.00 \times 10^4$ | $1.00 \times 10^{13}$ | $2.36 \times 10^{11}$ | $5.39 \times 10^{-7}$ | $6.03 \times 10^{-7}$ | $8.60 \times 10^1$ |
| 320      | $1.03 \times 10^{-24}$ | $4.04 \times 10^{-23}$ | $3.70 \times 10^{-23}$ | $5.00 \times 10^4$ | $1.00 \times 10^{13}$ | $2.29 \times 10^{11}$ | $5.14 \times 10^{-7}$ | $4.63 \times 10^{-7}$ | $8.46 \times 10^1$ |

Table S8: Concentration of different bimolecular species in molecules cm<sup>-3</sup>, calculated using the  $k_{eq1}$  values of path A, B, and C for FA catalyzed channel

| Temp (K) | $k_{eq1}^{pathA}$      | $k_{eq1}^{pathB}$      | $k_{eq1}^{pathC}$      | [CI]               | [CO]                  | [FA]                  | [CI-CO]               | [CI-FA]               | [FA-CO]            |
|----------|------------------------|------------------------|------------------------|--------------------|-----------------------|-----------------------|-----------------------|-----------------------|--------------------|
| 280      | $1.29 \times 10^{-24}$ | $7.25 \times 10^{-22}$ | $1.97 \times 10^{-23}$ | $5.00 \times 10^4$ | $1.00 \times 10^{13}$ | $2.62 \times 10^{11}$ | $6.46 \times 10^{-7}$ | $9.49 \times 10^{-6}$ | $5.16 \times 10^1$ |
| 290      | $1.21 \times 10^{-24}$ | $5.28 \times 10^{-22}$ | $1.91 \times 10^{-23}$ | $5.00 \times 10^4$ | $1.00 \times 10^{13}$ | $2.53 \times 10^{11}$ | $6.04 \times 10^{-7}$ | $6.68 \times 10^{-6}$ | $4.84 \times 10^1$ |
| 298      | $1.15 \times 10^{-24}$ | $4.17 \times 10^{-22}$ | $1.88 \times 10^{-23}$ | $5.00 \times 10^4$ | $1.00 \times 10^{13}$ | $2.46 \times 10^{11}$ | $5.76 \times 10^{-7}$ | $5.13 \times 10^{-6}$ | $4.62 \times 10^1$ |
| 300      | $1.14 \times 10^{-24}$ | $3.94 \times 10^{-22}$ | $1.87 \times 10^{-23}$ | $5.00 \times 10^4$ | $1.00 \times 10^{13}$ | $2.44 \times 10^{11}$ | $5.69 \times 10^{-7}$ | $4.81 \times 10^{-6}$ | $4.56 \times 10^1$ |
| 310      | $1.08 \times 10^{-24}$ | $3.01 \times 10^{-22}$ | $1.83 \times 10^{-23}$ | $5.00 \times 10^4$ | $1.00 \times 10^{13}$ | $2.36 \times 10^{11}$ | $5.39 \times 10^{-7}$ | $3.55 \times 10^{-6}$ | $4.33 \times 10^1$ |
| 320      | $1.03 \times 10^{-24}$ | $2.34 \times 10^{-22}$ | $1.80 \times 10^{-23}$ | $5.00 \times 10^4$ | $1.00 \times 10^{13}$ | $2.29 \times 10^{11}$ | $5.14 \times 10^{-7}$ | $2.68 \times 10^{-6}$ | $4.13 \times 10^1$ |

Table S9: Termolecular rate constant  $k_t$  in ( $\text{cm}^6 \text{ molecule}^{-2} \text{ sec}^{-1}$ ) for AM catalyzed channel corresponds to TS1 within the temperature range of 213-1000K

| Temp (K) | PATH A                 |                        |                    |                        | PATH B                 |                        |                    |                        | PATH C                 |                        |                    |                        |
|----------|------------------------|------------------------|--------------------|------------------------|------------------------|------------------------|--------------------|------------------------|------------------------|------------------------|--------------------|------------------------|
|          | keq1                   | keq2                   | kuni               | kt                     | keq1                   | keq2                   | kuni               | kt                     | keq1                   | keq2                   | kuni               | kt                     |
| 213      | $2.64 \times 10^{-24}$ | $3.48 \times 10^{-21}$ | 1.01               | $1.00 \times 10^{-44}$ | $1.88 \times 10^{-21}$ | $4.88 \times 10^{-24}$ | 1.01               | $1.00 \times 10^{-44}$ | $3.41 \times 10^{-23}$ | $2.69 \times 10^{-22}$ | 1.01               | $1.00 \times 10^{-44}$ |
| 216      | $2.52 \times 10^{-24}$ | $2.93 \times 10^{-21}$ | 1.45               | $1.15 \times 10^{-44}$ | $1.60 \times 10^{-21}$ | $4.62 \times 10^{-24}$ | 1.45               | $1.15 \times 10^{-44}$ | $3.41 \times 10^{-23}$ | $2.17 \times 10^{-22}$ | 1.45               | $1.15 \times 10^{-44}$ |
| 219      | $2.41 \times 10^{-24}$ | $2.47 \times 10^{-21}$ | 2.07               | $1.32 \times 10^{-44}$ | $1.36 \times 10^{-21}$ | $4.39 \times 10^{-24}$ | 2.07               | $1.32 \times 10^{-44}$ | $3.41 \times 10^{-23}$ | $1.75 \times 10^{-22}$ | 2.07               | $1.32 \times 10^{-44}$ |
| 224      | $2.25 \times 10^{-24}$ | $1.89 \times 10^{-21}$ | 3.65               | $1.66 \times 10^{-44}$ | $1.05 \times 10^{-21}$ | $4.05 \times 10^{-24}$ | 3.65               | $1.66 \times 10^{-44}$ | $3.40 \times 10^{-23}$ | $1.25 \times 10^{-22}$ | 3.65               | $1.66 \times 10^{-44}$ |
| 235      | $1.96 \times 10^{-24}$ | $1.09 \times 10^{-21}$ | $1.17 \times 10^1$ | $2.65 \times 10^{-44}$ | $6.21 \times 10^{-22}$ | $3.44 \times 10^{-24}$ | $1.17 \times 10^1$ | $2.65 \times 10^{-44}$ | $3.41 \times 10^{-23}$ | $6.26 \times 10^{-23}$ | $1.17 \times 10^1$ | $2.65 \times 10^{-44}$ |
| 250      | $1.66 \times 10^{-24}$ | $5.61 \times 10^{-22}$ | $4.86 \times 10^1$ | $4.78 \times 10^{-44}$ | $3.29 \times 10^{-22}$ | $2.83 \times 10^{-24}$ | $4.86 \times 10^1$ | $4.78 \times 10^{-44}$ | $3.43 \times 10^{-23}$ | $2.72 \times 10^{-23}$ | $4.86 \times 10^1$ | $4.78 \times 10^{-44}$ |
| 259      | $1.53 \times 10^{-24}$ | $3.92 \times 10^{-22}$ | $1.05 \times 10^2$ | $6.62 \times 10^{-44}$ | $2.34 \times 10^{-22}$ | $2.56 \times 10^{-24}$ | $1.05 \times 10^2$ | $6.62 \times 10^{-44}$ | $3.45 \times 10^{-23}$ | $1.74 \times 10^{-23}$ | $1.05 \times 10^2$ | $6.62 \times 10^{-44}$ |
| 265      | $1.45 \times 10^{-24}$ | $3.14 \times 10^{-22}$ | $1.71 \times 10^2$ | $8.17 \times 10^{-44}$ | $1.89 \times 10^{-22}$ | $2.41 \times 10^{-24}$ | $1.71 \times 10^2$ | $8.17 \times 10^{-44}$ | $3.47 \times 10^{-23}$ | $1.31 \times 10^{-23}$ | $1.71 \times 10^2$ | $8.17 \times 10^{-44}$ |
| 278      | $1.31 \times 10^{-24}$ | $2.01 \times 10^{-22}$ | $4.56 \times 10^2$ | $1.26 \times 10^{-43}$ | $1.23 \times 10^{-22}$ | $2.13 \times 10^{-24}$ | $4.56 \times 10^2$ | $1.26 \times 10^{-43}$ | $3.51 \times 10^{-23}$ | $7.48 \times 10^{-24}$ | $4.56 \times 10^2$ | $1.26 \times 10^{-43}$ |
| 280      | $1.29 \times 10^{-24}$ | $1.88 \times 10^{-22}$ | $5.26 \times 10^2$ | $1.34 \times 10^{-43}$ | $1.16 \times 10^{-22}$ | $2.10 \times 10^{-24}$ | $5.26 \times 10^2$ | $1.34 \times 10^{-43}$ | $3.52 \times 10^{-23}$ | $6.90 \times 10^{-24}$ | $5.26 \times 10^2$ | $1.34 \times 10^{-43}$ |
| 290      | $1.21 \times 10^{-24}$ | $1.38 \times 10^{-22}$ | $1.04 \times 10^3$ | $1.82 \times 10^{-43}$ | $8.63 \times 10^{-23}$ | $1.93 \times 10^{-24}$ | $1.04 \times 10^3$ | $1.82 \times 10^{-43}$ | $3.56 \times 10^{-23}$ | $4.69 \times 10^{-24}$ | $1.04 \times 10^3$ | $1.82 \times 10^{-43}$ |
| 298      | $1.15 \times 10^{-24}$ | $1.10 \times 10^{-22}$ | $1.74 \times 10^3$ | $2.30 \times 10^{-43}$ | $6.93 \times 10^{-23}$ | $1.82 \times 10^{-24}$ | $1.74 \times 10^3$ | $2.30 \times 10^{-43}$ | $3.59 \times 10^{-23}$ | $3.52 \times 10^{-24}$ | $1.74 \times 10^3$ | $2.30 \times 10^{-43}$ |
| 300      | $1.14 \times 10^{-24}$ | $1.04 \times 10^{-22}$ | $1.97 \times 10^3$ | $2.44 \times 10^{-43}$ | $6.57 \times 10^{-23}$ | $1.80 \times 10^{-24}$ | $1.97 \times 10^3$ | $2.44 \times 10^{-43}$ | $3.60 \times 10^{-23}$ | $3.28 \times 10^{-24}$ | $1.97 \times 10^3$ | $2.44 \times 10^{-43}$ |
| 310      | $1.08 \times 10^{-24}$ | $7.97 \times 10^{-23}$ | $3.57 \times 10^3$ | $3.22 \times 10^{-43}$ | $5.11 \times 10^{-23}$ | $1.68 \times 10^{-24}$ | $3.57 \times 10^3$ | $3.22 \times 10^{-43}$ | $3.65 \times 10^{-23}$ | $2.36 \times 10^{-24}$ | $3.57 \times 10^3$ | $3.22 \times 10^{-43}$ |
| 320      | $1.03 \times 10^{-24}$ | $6.23 \times 10^{-23}$ | $6.24 \times 10^3$ | $4.21 \times 10^{-43}$ | $4.04 \times 10^{-23}$ | $1.59 \times 10^{-24}$ | $6.24 \times 10^3$ | $4.21 \times 10^{-43}$ | $3.70 \times 10^{-23}$ | $1.73 \times 10^{-24}$ | $6.24 \times 10^3$ | $4.21 \times 10^{-43}$ |
| 330      | $9.85 \times 10^{-25}$ | $4.96 \times 10^{-23}$ | $1.05 \times 10^4$ | $5.44 \times 10^{-43}$ | $3.25 \times 10^{-23}$ | $1.50 \times 10^{-24}$ | $1.05 \times 10^4$ | $5.44 \times 10^{-43}$ | $3.75 \times 10^{-23}$ | $1.30 \times 10^{-24}$ | $1.05 \times 10^4$ | $5.44 \times 10^{-43}$ |
| 350      | $9.16 \times 10^{-25}$ | $3.29 \times 10^{-23}$ | $2.74 \times 10^4$ | $8.79 \times 10^{-43}$ | $2.20 \times 10^{-23}$ | $1.37 \times 10^{-24}$ | $2.74 \times 10^4$ | $8.79 \times 10^{-43}$ | $3.86 \times 10^{-23}$ | $7.81 \times 10^{-25}$ | $2.74 \times 10^4$ | $8.79 \times 10^{-43}$ |
| 375      | $8.55 \times 10^{-25}$ | $2.12 \times 10^{-23}$ | $7.81 \times 10^4$ | $1.53 \times 10^{-42}$ | $1.44 \times 10^{-23}$ | $1.25 \times 10^{-24}$ | $7.81 \times 10^4$ | $1.53 \times 10^{-42}$ | $4.01 \times 10^{-23}$ | $4.51 \times 10^{-25}$ | $7.81 \times 10^4$ | $1.53 \times 10^{-42}$ |
| 400      | $8.13 \times 10^{-25}$ | $1.45 \times 10^{-23}$ | $1.95 \times 10^5$ | $2.54 \times 10^{-42}$ | $1.01 \times 10^{-23}$ | $1.17 \times 10^{-24}$ | $1.95 \times 10^5$ | $2.54 \times 10^{-42}$ | $4.18 \times 10^{-23}$ | $2.83 \times 10^{-25}$ | $1.95 \times 10^5$ | $2.54 \times 10^{-42}$ |
| 425      | $7.84 \times 10^{-25}$ | $1.05 \times 10^{-23}$ | $4.38 \times 10^5$ | $4.06 \times 10^{-42}$ | $7.44 \times 10^{-24}$ | $1.11 \times 10^{-24}$ | $4.38 \times 10^5$ | $4.06 \times 10^{-42}$ | $4.35 \times 10^{-23}$ | $1.90 \times 10^{-25}$ | $4.38 \times 10^5$ | $4.06 \times 10^{-42}$ |
| 450      | $7.65 \times 10^{-25}$ | $7.98 \times 10^{-24}$ | $8.95 \times 10^5$ | $6.28 \times 10^{-42}$ | $5.72 \times 10^{-24}$ | $1.07 \times 10^{-24}$ | $8.95 \times 10^5$ | $6.28 \times 10^{-42}$ | $4.53 \times 10^{-23}$ | $1.35 \times 10^{-25}$ | $8.95 \times 10^5$ | $6.28 \times 10^{-42}$ |
| 475      | $7.54 \times 10^{-25}$ | $6.27 \times 10^{-24}$ | $1.70 \times 10^6$ | $9.46 \times 10^{-42}$ | $4.56 \times 10^{-24}$ | $1.04 \times 10^{-24}$ | $1.70 \times 10^6$ | $9.46 \times 10^{-42}$ | $4.72 \times 10^{-23}$ | $1.00 \times 10^{-25}$ | $1.70 \times 10^6$ | $9.46 \times 10^{-42}$ |
| 500      | $7.48 \times 10^{-25}$ | $5.08 \times 10^{-24}$ | $3.01 \times 10^6$ | $1.39 \times 10^{-41}$ | $3.74 \times 10^{-24}$ | $1.02 \times 10^{-24}$ | $3.01 \times 10^6$ | $1.39 \times 10^{-41}$ | $4.92 \times 10^{-23}$ | $7.73 \times 10^{-26}$ | $3.01 \times 10^6$ | $1.39 \times 10^{-41}$ |
| 550      | $7.52 \times 10^{-25}$ | $3.60 \times 10^{-24}$ | $8.11 \times 10^6$ | $2.84 \times 10^{-41}$ | $2.70 \times 10^{-24}$ | $1.00 \times 10^{-24}$ | $8.11 \times 10^6$ | $2.84 \times 10^{-41}$ | $5.34 \times 10^{-23}$ | $5.07 \times 10^{-26}$ | $8.11 \times 10^6$ | $2.84 \times 10^{-41}$ |
| 600      | $7.68 \times 10^{-25}$ | $2.76 \times 10^{-24}$ | $1.85 \times 10^7$ | $5.39 \times 10^{-41}$ | $2.11 \times 10^{-24}$ | $1.01 \times 10^{-24}$ | $1.85 \times 10^7$ | $5.39 \times 10^{-41}$ | $5.77 \times 10^{-23}$ | $3.67 \times 10^{-26}$ | $1.85 \times 10^7$ | $5.39 \times 10^{-41}$ |
| 650      | $7.95 \times 10^{-25}$ | $2.24 \times 10^{-24}$ | $3.70 \times 10^7$ | $9.70 \times 10^{-41}$ | $1.74 \times 10^{-24}$ | $1.03 \times 10^{-24}$ | $3.70 \times 10^7$ | $9.70 \times 10^{-41}$ | $6.23 \times 10^{-23}$ | $2.86 \times 10^{-26}$ | $3.70 \times 10^7$ | $9.70 \times 10^{-41}$ |
| 700      | $8.30 \times 10^{-25}$ | $1.90 \times 10^{-24}$ | $6.71 \times 10^7$ | $1.66 \times 10^{-40}$ | $1.50 \times 10^{-24}$ | $1.06 \times 10^{-24}$ | $6.71 \times 10^7$ | $1.66 \times 10^{-40}$ | $6.71 \times 10^{-23}$ | $2.36 \times 10^{-26}$ | $6.71 \times 10^7$ | $1.66 \times 10^{-40}$ |
| 750      | $8.72 \times 10^{-25}$ | $1.68 \times 10^{-24}$ | $1.12 \times 10^8$ | $2.73 \times 10^{-40}$ | $1.33 \times 10^{-24}$ | $1.10 \times 10^{-24}$ | $1.12 \times 10^8$ | $2.73 \times 10^{-40}$ | $7.20 \times 10^{-23}$ | $2.03 \times 10^{-26}$ | $1.12 \times 10^8$ | $2.73 \times 10^{-40}$ |
| 800      | $9.19 \times 10^{-25}$ | $1.52 \times 10^{-24}$ | $1.76 \times 10^8$ | $4.34 \times 10^{-40}$ | $1.22 \times 10^{-24}$ | $1.14 \times 10^{-24}$ | $1.76 \times 10^8$ | $4.34 \times 10^{-40}$ | $7.71 \times 10^{-23}$ | $1.81 \times 10^{-26}$ | $1.76 \times 10^8$ | $4.34 \times 10^{-40}$ |
| 850      | $9.72 \times 10^{-25}$ | $1.40 \times 10^{-24}$ | $2.62 \times 10^8$ | $6.66 \times 10^{-40}$ | $1.14 \times 10^{-24}$ | $1.20 \times 10^{-24}$ | $2.62 \times 10^8$ | $6.66 \times 10^{-40}$ | $8.23 \times 10^{-23}$ | $1.66 \times 10^{-26}$ | $2.62 \times 10^8$ | $6.66 \times 10^{-40}$ |
| 900      | $1.03 \times 10^{-24}$ | $1.32 \times 10^{-24}$ | $3.73 \times 10^8$ | $9.97 \times 10^{-40}$ | $1.08 \times 10^{-24}$ | $1.26 \times 10^{-24}$ | $3.73 \times 10^8$ | $9.97 \times 10^{-40}$ | $8.77 \times 10^{-23}$ | $1.55 \times 10^{-26}$ | $3.73 \times 10^8$ | $9.97 \times 10^{-40}$ |
| 950      | $1.09 \times 10^{-24}$ | $1.26 \times 10^{-24}$ | $5.10 \times 10^8$ | $1.45 \times 10^{-39}$ | $1.04 \times 10^{-24}$ | $1.33 \times 10^{-24}$ | $5.10 \times 10^8$ | $1.45 \times 10^{-39}$ | $9.32 \times 10^{-23}$ | $1.48 \times 10^{-26}$ | $5.10 \times 10^8$ | $1.45 \times 10^{-39}$ |
| 1000     | $1.16 \times 10^{-24}$ | $1.22 \times 10^{-24}$ | $6.78 \times 10^8$ | $2.07 \times 10^{-39}$ | $1.01 \times 10^{-24}$ | $1.40 \times 10^{-24}$ | $6.78 \times 10^8$ | $2.07 \times 10^{-39}$ | $9.89 \times 10^{-23}$ | $1.43 \times 10^{-26}$ | $6.78 \times 10^8$ | $2.07 \times 10^{-39}$ |

Table S10: Termolecular rate constant  $k_t$  in ( $\text{cm}^6 \text{ molecule}^{-2} \text{ sec}^{-1}$ ) for AM catalyzed channel corresponds to TS2 within the temperature range of 213-1000K

| Temp (K) | PATH A                 |                        |                       |                        | PATH B                 |                        |                       |                        | PATH C                 |                        |                       |                        |
|----------|------------------------|------------------------|-----------------------|------------------------|------------------------|------------------------|-----------------------|------------------------|------------------------|------------------------|-----------------------|------------------------|
|          | keq1                   | keq2                   | kuni                  | kt                     | keq1                   | keq2                   | kuni                  | kt                     | keq1                   | keq2                   | kuni                  | kt                     |
| 213      | $2.64 \times 10^{-24}$ | $3.48 \times 10^{-21}$ | 7.60                  | $7.53 \times 10^{-44}$ | $1.88 \times 10^{-21}$ | $4.88 \times 10^{-24}$ | 7.60                  | $7.53 \times 10^{-44}$ | $3.41 \times 10^{-23}$ | $2.69 \times 10^{-22}$ | 7.60                  | $7.53 \times 10^{-44}$ |
| 216      | $2.52 \times 10^{-24}$ | $2.93 \times 10^{-21}$ | $1.09 \times 10^1$    | $8.63 \times 10^{-44}$ | $1.60 \times 10^{-21}$ | $4.62 \times 10^{-24}$ | $1.09 \times 10^1$    | $8.63 \times 10^{-44}$ | $3.41 \times 10^{-23}$ | $2.17 \times 10^{-22}$ | $1.09 \times 10^1$    | $8.63 \times 10^{-44}$ |
| 219      | $2.41 \times 10^{-24}$ | $2.47 \times 10^{-21}$ | $1.55 \times 10^1$    | $9.89 \times 10^{-44}$ | $1.36 \times 10^{-21}$ | $4.39 \times 10^{-24}$ | $1.55 \times 10^1$    | $9.89 \times 10^{-44}$ | $3.41 \times 10^{-23}$ | $1.75 \times 10^{-22}$ | $1.55 \times 10^1$    | $9.89 \times 10^{-44}$ |
| 224      | $2.25 \times 10^{-24}$ | $1.89 \times 10^{-21}$ | $2.72 \times 10^1$    | $1.24 \times 10^{-43}$ | $1.05 \times 10^{-21}$ | $4.05 \times 10^{-24}$ | $2.72 \times 10^1$    | $1.24 \times 10^{-43}$ | $3.40 \times 10^{-23}$ | $1.25 \times 10^{-22}$ | $2.72 \times 10^1$    | $1.24 \times 10^{-43}$ |
| 235      | $1.96 \times 10^{-24}$ | $1.09 \times 10^{-21}$ | $8.75 \times 10^1$    | $1.98 \times 10^{-43}$ | $6.21 \times 10^{-22}$ | $3.44 \times 10^{-24}$ | $8.75 \times 10^1$    | $1.98 \times 10^{-43}$ | $3.41 \times 10^{-23}$ | $6.26 \times 10^{-23}$ | $8.75 \times 10^1$    | $1.98 \times 10^{-43}$ |
| 250      | $1.66 \times 10^{-24}$ | $5.61 \times 10^{-22}$ | $3.69 \times 10^2$    | $3.63 \times 10^{-43}$ | $3.29 \times 10^{-22}$ | $2.83 \times 10^{-24}$ | $3.69 \times 10^2$    | $3.63 \times 10^{-43}$ | $3.43 \times 10^{-23}$ | $2.72 \times 10^{-23}$ | $3.69 \times 10^2$    | $3.63 \times 10^{-43}$ |
| 259      | $1.53 \times 10^{-24}$ | $3.92 \times 10^{-22}$ | $8.12 \times 10^2$    | $5.11 \times 10^{-43}$ | $2.34 \times 10^{-22}$ | $2.56 \times 10^{-24}$ | $8.12 \times 10^2$    | $5.11 \times 10^{-43}$ | $3.45 \times 10^{-23}$ | $1.74 \times 10^{-23}$ | $8.12 \times 10^2$    | $5.11 \times 10^{-43}$ |
| 265      | $1.45 \times 10^{-24}$ | $3.14 \times 10^{-22}$ | $1.34 \times 10^3$    | $6.38 \times 10^{-43}$ | $1.89 \times 10^{-22}$ | $2.41 \times 10^{-24}$ | $1.34 \times 10^3$    | $6.38 \times 10^{-43}$ | $3.47 \times 10^{-23}$ | $1.31 \times 10^{-23}$ | $1.34 \times 10^3$    | $6.38 \times 10^{-43}$ |
| 278      | $1.31 \times 10^{-24}$ | $2.01 \times 10^{-22}$ | $3.67 \times 10^3$    | $1.01 \times 10^{-42}$ | $1.23 \times 10^{-22}$ | $2.13 \times 10^{-24}$ | $3.67 \times 10^3$    | $1.01 \times 10^{-42}$ | $3.51 \times 10^{-23}$ | $7.48 \times 10^{-24}$ | $3.67 \times 10^3$    | $1.01 \times 10^{-42}$ |
| 280      | $1.29 \times 10^{-24}$ | $1.88 \times 10^{-22}$ | $4.25 \times 10^3$    | $1.08 \times 10^{-42}$ | $1.16 \times 10^{-22}$ | $2.10 \times 10^{-24}$ | $4.25 \times 10^3$    | $1.08 \times 10^{-42}$ | $3.52 \times 10^{-23}$ | $6.90 \times 10^{-24}$ | $4.25 \times 10^3$    | $1.08 \times 10^{-42}$ |
| 290      | $1.21 \times 10^{-24}$ | $1.38 \times 10^{-22}$ | $8.63 \times 10^3$    | $1.51 \times 10^{-42}$ | $8.63 \times 10^{-23}$ | $1.93 \times 10^{-24}$ | $8.63 \times 10^3$    | $1.51 \times 10^{-42}$ | $3.56 \times 10^{-23}$ | $4.69 \times 10^{-24}$ | $8.63 \times 10^3$    | $1.51 \times 10^{-42}$ |
| 298      | $1.15 \times 10^{-24}$ | $1.10 \times 10^{-22}$ | $1.47 \times 10^4$    | $1.95 \times 10^{-42}$ | $6.93 \times 10^{-23}$ | $1.82 \times 10^{-24}$ | $1.47 \times 10^4$    | $1.95 \times 10^{-42}$ | $3.59 \times 10^{-23}$ | $3.52 \times 10^{-24}$ | $1.47 \times 10^4$    | $1.95 \times 10^{-42}$ |
| 300      | $1.14 \times 10^{-24}$ | $1.04 \times 10^{-22}$ | $1.67 \times 10^4$    | $2.07 \times 10^{-42}$ | $6.57 \times 10^{-23}$ | $1.80 \times 10^{-24}$ | $1.67 \times 10^4$    | $2.07 \times 10^{-42}$ | $3.60 \times 10^{-23}$ | $3.28 \times 10^{-24}$ | $1.67 \times 10^4$    | $2.07 \times 10^{-42}$ |
| 310      | $1.08 \times 10^{-24}$ | $7.97 \times 10^{-23}$ | $3.12 \times 10^4$    | $2.81 \times 10^{-42}$ | $5.11 \times 10^{-23}$ | $1.68 \times 10^{-24}$ | $3.12 \times 10^4$    | $2.81 \times 10^{-42}$ | $3.65 \times 10^{-23}$ | $2.36 \times 10^{-24}$ | $3.12 \times 10^4$    | $2.81 \times 10^{-42}$ |
| 320      | $1.03 \times 10^{-24}$ | $6.23 \times 10^{-23}$ | $5.59 \times 10^4$    | $3.78 \times 10^{-42}$ | $4.04 \times 10^{-23}$ | $1.59 \times 10^{-24}$ | $5.59 \times 10^4$    | $3.78 \times 10^{-42}$ | $3.70 \times 10^{-23}$ | $1.73 \times 10^{-24}$ | $5.59 \times 10^4$    | $3.78 \times 10^{-42}$ |
| 330      | $9.85 \times 10^{-25}$ | $4.96 \times 10^{-23}$ | $9.70 \times 10^4$    | $5.01 \times 10^{-42}$ | $3.25 \times 10^{-23}$ | $1.50 \times 10^{-24}$ | $9.70 \times 10^4$    | $5.01 \times 10^{-42}$ | $3.75 \times 10^{-23}$ | $1.30 \times 10^{-24}$ | $9.70 \times 10^4$    | $5.01 \times 10^{-42}$ |
| 350      | $9.16 \times 10^{-25}$ | $3.29 \times 10^{-23}$ | $2.66 \times 10^5$    | $8.55 \times 10^{-42}$ | $2.20 \times 10^{-23}$ | $1.37 \times 10^{-24}$ | $2.66 \times 10^5$    | $8.55 \times 10^{-42}$ | $3.86 \times 10^{-23}$ | $7.81 \times 10^{-25}$ | $2.66 \times 10^5$    | $8.55 \times 10^{-42}$ |
| 375      | $8.55 \times 10^{-25}$ | $2.12 \times 10^{-23}$ | $8.12 \times 10^5$    | $1.59 \times 10^{-41}$ | $1.44 \times 10^{-23}$ | $1.25 \times 10^{-24}$ | $8.12 \times 10^5$    | $1.59 \times 10^{-41}$ | $4.01 \times 10^{-23}$ | $4.51 \times 10^{-25}$ | $8.12 \times 10^5$    | $1.59 \times 10^{-41}$ |
| 400      | $8.13 \times 10^{-25}$ | $1.45 \times 10^{-23}$ | $2.16 \times 10^6$    | $2.81 \times 10^{-41}$ | $1.01 \times 10^{-23}$ | $1.17 \times 10^{-24}$ | $2.16 \times 10^6$    | $2.81 \times 10^{-41}$ | $4.18 \times 10^{-23}$ | $2.83 \times 10^{-25}$ | $2.16 \times 10^6$    | $2.81 \times 10^{-41}$ |
| 425      | $7.84 \times 10^{-25}$ | $1.05 \times 10^{-23}$ | $5.15 \times 10^6$    | $4.77 \times 10^{-41}$ | $7.44 \times 10^{-24}$ | $1.11 \times 10^{-24}$ | $5.15 \times 10^6$    | $4.77 \times 10^{-41}$ | $4.35 \times 10^{-23}$ | $1.90 \times 10^{-25}$ | $5.15 \times 10^6$    | $4.77 \times 10^{-41}$ |
| 450      | $7.65 \times 10^{-25}$ | $7.98 \times 10^{-24}$ | $1.12 \times 10^7$    | $7.82 \times 10^{-41}$ | $5.72 \times 10^{-24}$ | $1.07 \times 10^{-24}$ | $1.12 \times 10^7$    | $7.82 \times 10^{-41}$ | $4.53 \times 10^{-23}$ | $1.35 \times 10^{-25}$ | $1.12 \times 10^7$    | $7.82 \times 10^{-41}$ |
| 475      | $7.54 \times 10^{-25}$ | $6.27 \times 10^{-24}$ | $2.23 \times 10^7$    | $1.24 \times 10^{-40}$ | $4.56 \times 10^{-24}$ | $1.04 \times 10^{-24}$ | $2.23 \times 10^7$    | $1.24 \times 10^{-40}$ | $4.72 \times 10^{-23}$ | $1.00 \times 10^{-25}$ | $2.23 \times 10^7$    | $1.24 \times 10^{-40}$ |
| 500      | $7.48 \times 10^{-25}$ | $5.08 \times 10^{-24}$ | $4.17 \times 10^7$    | $1.93 \times 10^{-40}$ | $3.74 \times 10^{-24}$ | $1.02 \times 10^{-24}$ | $4.17 \times 10^7$    | $1.93 \times 10^{-40}$ | $4.92 \times 10^{-23}$ | $7.73 \times 10^{-26}$ | $4.17 \times 10^7$    | $1.93 \times 10^{-40}$ |
| 550      | $7.52 \times 10^{-25}$ | $3.60 \times 10^{-24}$ | $1.23 \times 10^8$    | $4.30 \times 10^{-40}$ | $2.70 \times 10^{-24}$ | $1.00 \times 10^{-24}$ | $1.23 \times 10^8$    | $4.30 \times 10^{-40}$ | $5.34 \times 10^{-23}$ | $5.07 \times 10^{-26}$ | $1.23 \times 10^8$    | $4.30 \times 10^{-40}$ |
| 600      | $7.68 \times 10^{-25}$ | $2.76 \times 10^{-24}$ | $3.04 \times 10^8$    | $8.89 \times 10^{-40}$ | $2.11 \times 10^{-24}$ | $1.01 \times 10^{-24}$ | $3.04 \times 10^8$    | $8.89 \times 10^{-40}$ | $5.77 \times 10^{-23}$ | $3.67 \times 10^{-26}$ | $3.04 \times 10^8$    | $8.89 \times 10^{-40}$ |
| 650      | $7.95 \times 10^{-25}$ | $2.24 \times 10^{-24}$ | $6.56 \times 10^8$    | $1.72 \times 10^{-39}$ | $1.74 \times 10^{-24}$ | $1.03 \times 10^{-24}$ | $6.56 \times 10^8$    | $1.72 \times 10^{-39}$ | $6.23 \times 10^{-23}$ | $2.86 \times 10^{-26}$ | $6.56 \times 10^8$    | $1.72 \times 10^{-39}$ |
| 700      | $8.30 \times 10^{-25}$ | $1.90 \times 10^{-24}$ | $1.27 \times 10^9$    | $3.14 \times 10^{-39}$ | $1.50 \times 10^{-24}$ | $1.06 \times 10^{-24}$ | $1.27 \times 10^9$    | $3.14 \times 10^{-39}$ | $6.71 \times 10^{-23}$ | $2.36 \times 10^{-26}$ | $1.27 \times 10^9$    | $3.14 \times 10^{-39}$ |
| 750      | $8.72 \times 10^{-25}$ | $1.68 \times 10^{-24}$ | $2.25 \times 10^9$    | $5.47 \times 10^{-39}$ | $1.32 \times 10^{-24}$ | $1.10 \times 10^{-24}$ | $2.25 \times 10^9$    | $5.47 \times 10^{-39}$ | $7.20 \times 10^{-23}$ | $2.03 \times 10^{-26}$ | $2.25 \times 10^9$    | $5.47 \times 10^{-39}$ |
| 800      | $9.19 \times 10^{-25}$ | $1.52 \times 10^{-24}$ | $3.71 \times 10^9$    | $9.13 \times 10^{-39}$ | $1.22 \times 10^{-24}$ | $1.14 \times 10^{-24}$ | $3.71 \times 10^9$    | $9.13 \times 10^{-39}$ | $7.71 \times 10^{-23}$ | $1.81 \times 10^{-26}$ | $3.71 \times 10^9$    | $9.13 \times 10^{-39}$ |
| 850      | $9.72 \times 10^{-25}$ | $1.40 \times 10^{-24}$ | $5.78 \times 10^9$    | $1.47 \times 10^{-38}$ | $1.14 \times 10^{-24}$ | $1.20 \times 10^{-24}$ | $5.78 \times 10^9$    | $1.47 \times 10^{-38}$ | $8.23 \times 10^{-23}$ | $1.66 \times 10^{-26}$ | $5.78 \times 10^9$    | $1.47 \times 10^{-38}$ |
| 900      | $1.03 \times 10^{-24}$ | $1.32 \times 10^{-24}$ | $8.57 \times 10^9$    | $2.29 \times 10^{-38}$ | $1.08 \times 10^{-24}$ | $1.26 \times 10^{-24}$ | $8.57 \times 10^9$    | $2.29 \times 10^{-38}$ | $8.77 \times 10^{-23}$ | $1.55 \times 10^{-26}$ | $8.57 \times 10^9$    | $2.29 \times 10^{-38}$ |
| 950      | $1.09 \times 10^{-24}$ | $1.26 \times 10^{-24}$ | $1.22 \times 10^{10}$ | $3.47 \times 10^{-38}$ | $1.04 \times 10^{-24}$ | $1.33 \times 10^{-24}$ | $1.22 \times 10^{10}$ | $3.47 \times 10^{-38}$ | $9.32 \times 10^{-23}$ | $1.48 \times 10^{-26}$ | $1.22 \times 10^{10}$ | $3.47 \times 10^{-38}$ |
| 1000     | $1.16 \times 10^{-24}$ | $1.22 \times 10^{-24}$ | $1.68 \times 10^{10}$ | $5.12 \times 10^{-38}$ | $1.01 \times 10^{-24}$ | $1.40 \times 10^{-24}$ | $1.68 \times 10^{10}$ | $5.12 \times 10^{-38}$ | $9.89 \times 10^{-23}$ | $1.43 \times 10^{-26}$ | $1.68 \times 10^{10}$ | $5.12 \times 10^{-38}$ |



Table S11: Termolecular rate constant  $k_t$  in ( $\text{cm}^6 \text{ molecule}^{-2} \text{ sec}^{-1}$ ) for AM catalyzed channel corresponds to TS3 within the temperature range of 213-1000K

| Temp (K) | PATH A                 |                        |                       |                        |                        | PATH B                 |                       |                        |                        |                        | PATH C                |                        |                        |                        |                       |                        |
|----------|------------------------|------------------------|-----------------------|------------------------|------------------------|------------------------|-----------------------|------------------------|------------------------|------------------------|-----------------------|------------------------|------------------------|------------------------|-----------------------|------------------------|
|          | keq1                   | keq2                   | kumi                  | kt                     |
| 213      | $2.64 \times 10^{-24}$ | $3.48 \times 10^{-21}$ | $1.23 \times 10^{-3}$ | $1.21 \times 10^{-47}$ | $1.88 \times 10^{-21}$ | $4.88 \times 10^{-24}$ | $1.23 \times 10^{-3}$ | $1.21 \times 10^{-47}$ | $3.41 \times 10^{-23}$ | $2.69 \times 10^{-22}$ | $1.23 \times 10^{-3}$ | $1.21 \times 10^{-47}$ | $3.41 \times 10^{-23}$ | $2.69 \times 10^{-22}$ | $1.23 \times 10^{-3}$ | $1.21 \times 10^{-47}$ |
| 216      | $2.52 \times 10^{-24}$ | $2.93 \times 10^{-21}$ | $1.91 \times 10^{-3}$ | $1.52 \times 10^{-47}$ | $1.60 \times 10^{-21}$ | $4.62 \times 10^{-24}$ | $1.91 \times 10^{-3}$ | $1.52 \times 10^{-47}$ | $3.41 \times 10^{-23}$ | $2.17 \times 10^{-22}$ | $1.91 \times 10^{-3}$ | $1.52 \times 10^{-47}$ | $3.41 \times 10^{-23}$ | $2.17 \times 10^{-22}$ | $1.91 \times 10^{-3}$ | $1.52 \times 10^{-47}$ |
| 219      | $2.41 \times 10^{-24}$ | $2.47 \times 10^{-21}$ | $2.95 \times 10^{-3}$ | $1.89 \times 10^{-47}$ | $1.36 \times 10^{-21}$ | $4.39 \times 10^{-24}$ | $2.95 \times 10^{-3}$ | $1.89 \times 10^{-47}$ | $3.41 \times 10^{-23}$ | $1.75 \times 10^{-22}$ | $2.95 \times 10^{-3}$ | $1.89 \times 10^{-47}$ | $3.41 \times 10^{-23}$ | $1.75 \times 10^{-22}$ | $2.95 \times 10^{-3}$ | $1.89 \times 10^{-47}$ |
| 224      | $2.25 \times 10^{-24}$ | $1.89 \times 10^{-21}$ | $5.93 \times 10^{-3}$ | $2.69 \times 10^{-47}$ | $1.05 \times 10^{-21}$ | $4.05 \times 10^{-24}$ | $5.93 \times 10^{-3}$ | $2.69 \times 10^{-47}$ | $3.40 \times 10^{-23}$ | $1.25 \times 10^{-22}$ | $5.93 \times 10^{-3}$ | $2.69 \times 10^{-47}$ | $3.40 \times 10^{-23}$ | $1.25 \times 10^{-22}$ | $5.93 \times 10^{-3}$ | $2.69 \times 10^{-47}$ |
| 235      | $1.96 \times 10^{-24}$ | $1.09 \times 10^{-21}$ | $2.48 \times 10^{-2}$ | $5.61 \times 10^{-47}$ | $6.21 \times 10^{-22}$ | $3.44 \times 10^{-24}$ | $2.48 \times 10^{-2}$ | $5.61 \times 10^{-47}$ | $3.41 \times 10^{-23}$ | $6.26 \times 10^{-23}$ | $2.48 \times 10^{-2}$ | $5.61 \times 10^{-47}$ | $3.41 \times 10^{-23}$ | $6.26 \times 10^{-23}$ | $2.48 \times 10^{-2}$ | $5.61 \times 10^{-47}$ |
| 250      | $1.66 \times 10^{-24}$ | $5.61 \times 10^{-22}$ | $1.42 \times 10^{-1}$ | $1.39 \times 10^{-46}$ | $3.29 \times 10^{-22}$ | $2.83 \times 10^{-24}$ | $1.42 \times 10^{-1}$ | $1.39 \times 10^{-46}$ | $3.43 \times 10^{-23}$ | $2.72 \times 10^{-23}$ | $1.42 \times 10^{-1}$ | $1.39 \times 10^{-46}$ | $3.43 \times 10^{-23}$ | $2.72 \times 10^{-23}$ | $1.42 \times 10^{-1}$ | $1.39 \times 10^{-46}$ |
| 259      | $1.53 \times 10^{-24}$ | $3.92 \times 10^{-22}$ | $3.66 \times 10^{-1}$ | $2.30 \times 10^{-46}$ | $2.34 \times 10^{-22}$ | $2.56 \times 10^{-24}$ | $3.66 \times 10^{-1}$ | $2.30 \times 10^{-46}$ | $3.45 \times 10^{-23}$ | $1.74 \times 10^{-23}$ | $3.66 \times 10^{-1}$ | $2.30 \times 10^{-46}$ | $3.45 \times 10^{-23}$ | $1.74 \times 10^{-23}$ | $3.66 \times 10^{-1}$ | $2.30 \times 10^{-46}$ |
| 265      | $1.45 \times 10^{-24}$ | $3.14 \times 10^{-22}$ | $6.65 \times 10^{-1}$ | $3.17 \times 10^{-46}$ | $1.89 \times 10^{-22}$ | $2.41 \times 10^{-24}$ | $6.65 \times 10^{-1}$ | $3.17 \times 10^{-46}$ | $3.47 \times 10^{-23}$ | $1.31 \times 10^{-23}$ | $6.65 \times 10^{-1}$ | $3.17 \times 10^{-46}$ | $3.47 \times 10^{-23}$ | $1.31 \times 10^{-23}$ | $6.65 \times 10^{-1}$ | $3.17 \times 10^{-46}$ |
| 278      | $1.31 \times 10^{-24}$ | $2.01 \times 10^{-22}$ | 2.21                  | $6.09 \times 10^{-46}$ | $1.23 \times 10^{-22}$ | $2.13 \times 10^{-24}$ | 2.21                  | $6.09 \times 10^{-46}$ | $3.51 \times 10^{-23}$ | $7.48 \times 10^{-24}$ | 2.21                  | $6.09 \times 10^{-46}$ | $3.51 \times 10^{-23}$ | $7.48 \times 10^{-24}$ | 2.21                  | $6.09 \times 10^{-46}$ |
| 280      | $1.29 \times 10^{-24}$ | $1.88 \times 10^{-22}$ | 2.63                  | $6.70 \times 10^{-46}$ | $1.16 \times 10^{-22}$ | $2.10 \times 10^{-24}$ | 2.63                  | $6.70 \times 10^{-46}$ | $3.52 \times 10^{-23}$ | $6.90 \times 10^{-24}$ | 2.63                  | $6.70 \times 10^{-46}$ | $3.52 \times 10^{-23}$ | $6.90 \times 10^{-24}$ | 2.63                  | $6.70 \times 10^{-46}$ |
| 290      | $1.21 \times 10^{-24}$ | $1.38 \times 10^{-22}$ | 6.09                  | $1.06 \times 10^{-45}$ | $8.63 \times 10^{-23}$ | $1.93 \times 10^{-24}$ | 6.09                  | $1.06 \times 10^{-45}$ | $3.56 \times 10^{-23}$ | $4.69 \times 10^{-24}$ | 6.09                  | $1.06 \times 10^{-45}$ | $3.56 \times 10^{-23}$ | $4.69 \times 10^{-24}$ | 6.09                  | $1.06 \times 10^{-45}$ |
| 298      | $1.15 \times 10^{-24}$ | $1.10 \times 10^{-22}$ | $1.14 \times 10^1$    | $1.51 \times 10^{-45}$ | $6.93 \times 10^{-23}$ | $1.82 \times 10^{-24}$ | $1.14 \times 10^1$    | $1.51 \times 10^{-45}$ | $3.59 \times 10^{-23}$ | $3.52 \times 10^{-24}$ | $1.14 \times 10^1$    | $1.51 \times 10^{-45}$ | $3.59 \times 10^{-23}$ | $3.52 \times 10^{-24}$ | $1.14 \times 10^1$    | $1.51 \times 10^{-45}$ |
| 300      | $1.14 \times 10^{-24}$ | $1.04 \times 10^{-22}$ | $1.33 \times 10^1$    | $1.65 \times 10^{-45}$ | $6.57 \times 10^{-23}$ | $1.80 \times 10^{-24}$ | $1.33 \times 10^1$    | $1.65 \times 10^{-45}$ | $3.60 \times 10^{-23}$ | $3.28 \times 10^{-24}$ | $1.33 \times 10^1$    | $1.65 \times 10^{-45}$ | $3.60 \times 10^{-23}$ | $3.28 \times 10^{-24}$ | $1.33 \times 10^1$    | $1.65 \times 10^{-45}$ |
| 310      | $1.08 \times 10^{-24}$ | $7.97 \times 10^{-23}$ | $2.76 \times 10^1$    | $2.49 \times 10^{-45}$ | $5.11 \times 10^{-23}$ | $1.68 \times 10^{-24}$ | $2.76 \times 10^1$    | $2.49 \times 10^{-45}$ | $3.65 \times 10^{-23}$ | $2.36 \times 10^{-24}$ | $2.76 \times 10^1$    | $2.49 \times 10^{-45}$ | $3.65 \times 10^{-23}$ | $2.36 \times 10^{-24}$ | $2.76 \times 10^1$    | $2.49 \times 10^{-45}$ |
| 320      | $1.03 \times 10^{-24}$ | $6.23 \times 10^{-23}$ | $5.47 \times 10^1$    | $3.69 \times 10^{-45}$ | $4.04 \times 10^{-23}$ | $1.59 \times 10^{-24}$ | $5.47 \times 10^1$    | $3.69 \times 10^{-45}$ | $3.70 \times 10^{-23}$ | $1.73 \times 10^{-24}$ | $5.47 \times 10^1$    | $3.69 \times 10^{-45}$ | $3.70 \times 10^{-23}$ | $1.73 \times 10^{-24}$ | $5.47 \times 10^1$    | $3.69 \times 10^{-45}$ |
| 330      | $9.85 \times 10^{-25}$ | $4.96 \times 10^{-23}$ | $1.04 \times 10^2$    | $5.36 \times 10^{-45}$ | $3.25 \times 10^{-23}$ | $1.50 \times 10^{-24}$ | $1.04 \times 10^2$    | $5.36 \times 10^{-45}$ | $3.75 \times 10^{-23}$ | $1.30 \times 10^{-24}$ | $1.04 \times 10^2$    | $5.36 \times 10^{-45}$ | $3.75 \times 10^{-23}$ | $1.30 \times 10^{-24}$ | $1.04 \times 10^2$    | $5.36 \times 10^{-45}$ |
| 350      | $9.16 \times 10^{-25}$ | $3.29 \times 10^{-23}$ | $3.36 \times 10^2$    | $1.08 \times 10^{-44}$ | $2.20 \times 10^{-23}$ | $1.37 \times 10^{-24}$ | $3.36 \times 10^2$    | $1.08 \times 10^{-44}$ | $3.86 \times 10^{-23}$ | $7.81 \times 10^{-25}$ | $3.36 \times 10^2$    | $1.08 \times 10^{-44}$ | $3.86 \times 10^{-23}$ | $7.81 \times 10^{-25}$ | $3.36 \times 10^2$    | $1.08 \times 10^{-44}$ |
| 375      | $8.55 \times 10^{-25}$ | $2.12 \times 10^{-23}$ | $1.22 \times 10^3$    | $2.37 \times 10^{-44}$ | $1.44 \times 10^{-23}$ | $1.25 \times 10^{-24}$ | $1.22 \times 10^3$    | $2.37 \times 10^{-44}$ | $4.01 \times 10^{-23}$ | $4.51 \times 10^{-25}$ | $1.22 \times 10^3$    | $2.37 \times 10^{-44}$ | $4.01 \times 10^{-23}$ | $4.51 \times 10^{-25}$ | $1.22 \times 10^3$    | $2.37 \times 10^{-44}$ |
| 400      | $8.13 \times 10^{-25}$ | $1.45 \times 10^{-23}$ | $3.74 \times 10^3$    | $4.85 \times 10^{-44}$ | $1.01 \times 10^{-23}$ | $1.17 \times 10^{-24}$ | $3.74 \times 10^3$    | $4.85 \times 10^{-44}$ | $4.18 \times 10^{-23}$ | $2.83 \times 10^{-25}$ | $3.74 \times 10^3$    | $4.85 \times 10^{-44}$ | $4.18 \times 10^{-23}$ | $2.83 \times 10^{-25}$ | $3.74 \times 10^3$    | $4.85 \times 10^{-44}$ |
| 425      | $7.84 \times 10^{-25}$ | $1.05 \times 10^{-23}$ | $1.01 \times 10^4$    | $9.32 \times 10^{-44}$ | $7.44 \times 10^{-24}$ | $1.11 \times 10^{-24}$ | $1.01 \times 10^4$    | $9.32 \times 10^{-44}$ | $4.35 \times 10^{-23}$ | $1.90 \times 10^{-25}$ | $1.01 \times 10^4$    | $9.32 \times 10^{-44}$ | $4.35 \times 10^{-23}$ | $1.90 \times 10^{-25}$ | $1.01 \times 10^4$    | $9.32 \times 10^{-44}$ |
| 450      | $7.65 \times 10^{-25}$ | $7.98 \times 10^{-24}$ | $2.42 \times 10^4$    | $1.70 \times 10^{-43}$ | $5.72 \times 10^{-24}$ | $1.07 \times 10^{-24}$ | $2.42 \times 10^4$    | $1.70 \times 10^{-43}$ | $4.53 \times 10^{-23}$ | $1.35 \times 10^{-25}$ | $2.42 \times 10^4$    | $1.70 \times 10^{-43}$ | $4.53 \times 10^{-23}$ | $1.35 \times 10^{-25}$ | $2.42 \times 10^4$    | $1.70 \times 10^{-43}$ |
| 475      | $7.54 \times 10^{-25}$ | $6.27 \times 10^{-24}$ | $5.30 \times 10^4$    | $2.95 \times 10^{-43}$ | $4.56 \times 10^{-24}$ | $1.04 \times 10^{-24}$ | $5.30 \times 10^4$    | $2.95 \times 10^{-43}$ | $4.72 \times 10^{-23}$ | $1.00 \times 10^{-25}$ | $5.30 \times 10^4$    | $2.95 \times 10^{-43}$ | $4.72 \times 10^{-23}$ | $1.00 \times 10^{-25}$ | $5.30 \times 10^4$    | $2.95 \times 10^{-43}$ |
| 500      | $7.48 \times 10^{-25}$ | $5.08 \times 10^{-24}$ | $1.07 \times 10^5$    | $4.95 \times 10^{-43}$ | $3.74 \times 10^{-24}$ | $1.02 \times 10^{-24}$ | $1.07 \times 10^5$    | $4.95 \times 10^{-43}$ | $4.92 \times 10^{-23}$ | $7.73 \times 10^{-26}$ | $1.07 \times 10^5$    | $4.95 \times 10^{-43}$ | $4.92 \times 10^{-23}$ | $7.73 \times 10^{-26}$ | $1.07 \times 10^5$    | $4.95 \times 10^{-43}$ |
| 550      | $7.52 \times 10^{-25}$ | $3.60 \times 10^{-24}$ | $3.61 \times 10^5$    | $1.26 \times 10^{-42}$ | $2.70 \times 10^{-24}$ | $1.00 \times 10^{-24}$ | $3.61 \times 10^5$    | $1.26 \times 10^{-42}$ | $5.34 \times 10^{-23}$ | $5.07 \times 10^{-26}$ | $3.61 \times 10^5$    | $1.26 \times 10^{-42}$ | $5.34 \times 10^{-23}$ | $5.07 \times 10^{-26}$ | $3.61 \times 10^5$    | $1.26 \times 10^{-42}$ |
| 600      | $7.68 \times 10^{-25}$ | $2.76 \times 10^{-24}$ | $9.93 \times 10^5$    | $2.90 \times 10^{-42}$ | $2.11 \times 10^{-24}$ | $1.01 \times 10^{-24}$ | $9.93 \times 10^5$    | $2.90 \times 10^{-42}$ | $5.77 \times 10^{-23}$ | $3.67 \times 10^{-26}$ | $9.93 \times 10^5$    | $2.90 \times 10^{-42}$ | $5.77 \times 10^{-23}$ | $3.67 \times 10^{-26}$ | $9.93 \times 10^5$    | $2.90 \times 10^{-42}$ |
| 650      | $7.95 \times 10^{-25}$ | $2.24 \times 10^{-24}$ | $2.33 \times 10^6$    | $6.11 \times 10^{-42}$ | $1.74 \times 10^{-24}$ | $1.03 \times 10^{-24}$ | $2.33 \times 10^6$    | $6.11 \times 10^{-42}$ | $6.23 \times 10^{-23}$ | $2.86 \times 10^{-26}$ | $2.33 \times 10^6$    | $6.11 \times 10^{-42}$ | $6.23 \times 10^{-23}$ | $2.86 \times 10^{-26}$ | $2.33 \times 10^6$    | $6.11 \times 10^{-42}$ |
| 700      | $8.30 \times 10^{-25}$ | $1.90 \times 10^{-24}$ | $4.85 \times 10^6$    | $1.20 \times 10^{-41}$ | $1.50 \times 10^{-24}$ | $1.06 \times 10^{-24}$ | $4.85 \times 10^6$    | $1.20 \times 10^{-41}$ | $6.71 \times 10^{-23}$ | $2.36 \times 10^{-26}$ | $4.85 \times 10^6$    | $1.20 \times 10^{-41}$ | $6.71 \times 10^{-23}$ | $2.36 \times 10^{-26}$ | $4.85 \times 10^6$    | $1.20 \times 10^{-41}$ |
| 750      | $8.72 \times 10^{-25}$ | $1.68 \times 10^{-24}$ | $9.13 \times 10^6$    | $2.22 \times 10^{-41}$ | $1.33 \times 10^{-24}$ | $1.10 \times 10^{-24}$ | $9.13 \times 10^6$    | $2.22 \times 10^{-41}$ | $7.20 \times 10^{-23}$ | $2.03 \times 10^{-26}$ | $9.13 \times 10^6$    | $2.22 \times 10^{-41}$ | $7.20 \times 10^{-23}$ | $2.03 \times 10^{-26}$ | $9.13 \times 10^6$    | $2.22 \times 10^{-41}$ |
| 800      | $9.19 \times 10^{-25}$ | $1.52 \times 10^{-24}$ | $1.59 \times 10^7$    | $3.91 \times 10^{-41}$ | $1.22 \times 10^{-24}$ | $1.14 \times 10^{-24}$ | $1.59 \times 10^7$    | $3.91 \times 10^{-41}$ | $7.71 \times 10^{-23}$ | $1.81 \times 10^{-26}$ | $1.59 \times 10^7$    | $3.91 \times 10^{-41}$ | $7.71 \times 10^{-23}$ | $1.81 \times 10^{-26}$ | $1.59 \times 10^7$    | $3.91 \times 10^{-41}$ |
| 850      | $9.72 \times 10^{-25}$ | $1.40 \times 10^{-24}$ | $2.59 \times 10^7$    | $6.59 \times 10^{-41}$ | $1.14 \times 10^{-24}$ | $1.20 \times 10^{-24}$ | $2.59 \times 10^7$    | $6.59 \times 10^{-41}$ | $8.23 \times 10^{-23}$ | $1.66 \times 10^{-26}$ | $2.59 \times 10^7$    | $6.59 \times 10^{-41}$ | $8.23 \times 10^{-23}$ | $1.66 \times 10^{-26}$ | $2.59 \times 10^7$    | $6.59 \times 10^{-41}$ |
| 900      | $1.03 \times 10^{-24}$ | $1.32 \times 10^{-24}$ | $4.00 \times 10^7$    | $1.07 \times 10^{-40}$ | $1.08 \times 10^{-24}$ | $1.26 \times 10^{-24}$ | $4.00 \times 10^7$    | $1.07 \times 10^{-40}$ | $8.77 \times 10^{-23}$ | $1.55 \times 10^{-26}$ | $4.00 \times 10^7$    | $1.07 \times 10^{-40}$ | $8.77 \times 10^{-23}$ | $1.55 \times 10^{-26}$ | $4.00 \times 10^7$    | $1.07 \times 10^{-40}$ |
| 950      | $1.09 \times 10^{-24}$ | $1.26 \times 10^{-24}$ | $5.90 \times 10^7$    | $1.68 \times 10^{-40}$ | $1.04 \times 10^{-24}$ | $1.33 \times 10^{-24}$ | $5.90 \times 10^7$    | $1.68 \times 10^{-40}$ | $9.32 \times 10^{-23}$ | $1.48 \times 10^{-26}$ | $5.90 \times 10^7$    | $1.68 \times 10^{-40}$ | $9.32 \times 10^{-23}$ | $1.48 \times 10^{-26}$ | $5.90 \times 10^7$    | $1.68 \times 10^{-40}$ |
| 1000     | $1.16 \times 10^{-24}$ | $1.22 \times 10^{-24}$ | $8.37 \times 10^7$    | $2.56 \times 10^{-40}$ | $1.01 \times 10^{-24}$ | $1.40 \times 10^{-24}$ | $8.37 \times 10^7$    | $2.56 \times 10^{-40}$ | $9.89 \times 10^{-23}$ | $1.43 \times 10^{-26}$ | $8.37 \times 10^7$    | $2.56 \times 10^{-40}$ | $9.89 \times 10^{-23}$ | $1.43 \times 10^{-26}$ | $8.37 \times 10^7$    | $2.56 \times 10^{-40}$ |

Table S12: Termolecular rate constant  $k_t$  in ( $\text{cm}^6 \text{ molecule}^{-2} \text{ sec}^{-1}$ ) for AM catalyzed channel corresponds to TS2' within the temperature range of 213-1000K

| Temp (K) | PATH A                 |                        |                    |                        | PATH B                 |                        |                    |                        | PATH C                 |                        |                    |                        |
|----------|------------------------|------------------------|--------------------|------------------------|------------------------|------------------------|--------------------|------------------------|------------------------|------------------------|--------------------|------------------------|
|          | keq1                   | keq2                   | kuni               | kt                     | keq1                   | keq2                   | kuni               | kt                     | keq1                   | keq2                   | kuni               | kt                     |
| 213      | $2.64 \times 10^{-24}$ | $3.48 \times 10^{-21}$ | $1.24 \times 10^4$ | $1.23 \times 10^{-40}$ | $1.88 \times 10^{-21}$ | $4.88 \times 10^{-24}$ | $1.24 \times 10^4$ | $1.23 \times 10^{-40}$ | $3.41 \times 10^{-23}$ | $2.69 \times 10^{-22}$ | $1.24 \times 10^4$ | $1.23 \times 10^{-40}$ |
| 216      | $2.52 \times 10^{-24}$ | $2.93 \times 10^{-21}$ | $1.47 \times 10^4$ | $1.16 \times 10^{-40}$ | $1.60 \times 10^{-21}$ | $4.62 \times 10^{-24}$ | $1.47 \times 10^4$ | $1.16 \times 10^{-40}$ | $3.41 \times 10^{-23}$ | $2.17 \times 10^{-22}$ | $1.47 \times 10^4$ | $1.16 \times 10^{-40}$ |
| 219      | $2.41 \times 10^{-24}$ | $2.47 \times 10^{-21}$ | $1.72 \times 10^4$ | $1.10 \times 10^{-40}$ | $1.36 \times 10^{-21}$ | $4.39 \times 10^{-24}$ | $1.72 \times 10^4$ | $1.10 \times 10^{-40}$ | $3.41 \times 10^{-23}$ | $1.75 \times 10^{-22}$ | $1.72 \times 10^4$ | $1.10 \times 10^{-40}$ |
| 224      | $2.25 \times 10^{-24}$ | $1.89 \times 10^{-21}$ | $2.23 \times 10^4$ | $1.01 \times 10^{-40}$ | $1.05 \times 10^{-21}$ | $4.05 \times 10^{-24}$ | $2.23 \times 10^4$ | $1.01 \times 10^{-40}$ | $3.40 \times 10^{-23}$ | $1.25 \times 10^{-22}$ | $2.23 \times 10^4$ | $1.01 \times 10^{-40}$ |
| 235      | $1.96 \times 10^{-24}$ | $1.09 \times 10^{-21}$ | $3.76 \times 10^4$ | $8.52 \times 10^{-41}$ | $6.21 \times 10^{-22}$ | $3.44 \times 10^{-24}$ | $3.76 \times 10^4$ | $8.52 \times 10^{-41}$ | $3.41 \times 10^{-23}$ | $6.26 \times 10^{-23}$ | $3.76 \times 10^4$ | $8.52 \times 10^{-41}$ |
| 250      | $1.66 \times 10^{-24}$ | $5.61 \times 10^{-22}$ | $7.05 \times 10^4$ | $6.93 \times 10^{-41}$ | $3.29 \times 10^{-22}$ | $2.83 \times 10^{-24}$ | $7.05 \times 10^4$ | $6.93 \times 10^{-41}$ | $3.43 \times 10^{-23}$ | $2.72 \times 10^{-23}$ | $7.05 \times 10^4$ | $6.93 \times 10^{-41}$ |
| 259      | $1.53 \times 10^{-24}$ | $3.92 \times 10^{-22}$ | $9.86 \times 10^4$ | $6.21 \times 10^{-41}$ | $2.34 \times 10^{-22}$ | $2.56 \times 10^{-24}$ | $9.86 \times 10^4$ | $6.21 \times 10^{-41}$ | $3.45 \times 10^{-23}$ | $1.74 \times 10^{-23}$ | $9.86 \times 10^4$ | $6.21 \times 10^{-41}$ |
| 265      | $1.45 \times 10^{-24}$ | $3.14 \times 10^{-22}$ | $1.22 \times 10^5$ | $5.80 \times 10^{-41}$ | $1.89 \times 10^{-22}$ | $2.41 \times 10^{-24}$ | $1.22 \times 10^5$ | $5.80 \times 10^{-41}$ | $3.47 \times 10^{-23}$ | $1.31 \times 10^{-23}$ | $1.22 \times 10^5$ | $5.80 \times 10^{-41}$ |
| 278      | $1.31 \times 10^{-24}$ | $2.01 \times 10^{-22}$ | $1.84 \times 10^5$ | $5.07 \times 10^{-41}$ | $1.23 \times 10^{-22}$ | $2.13 \times 10^{-24}$ | $1.84 \times 10^5$ | $5.07 \times 10^{-41}$ | $3.51 \times 10^{-23}$ | $7.48 \times 10^{-24}$ | $1.84 \times 10^5$ | $5.07 \times 10^{-41}$ |
| 280      | $1.29 \times 10^{-24}$ | $1.88 \times 10^{-22}$ | $1.96 \times 10^5$ | $4.97 \times 10^{-41}$ | $1.16 \times 10^{-22}$ | $2.10 \times 10^{-24}$ | $1.96 \times 10^5$ | $4.97 \times 10^{-41}$ | $3.52 \times 10^{-23}$ | $6.90 \times 10^{-24}$ | $1.96 \times 10^5$ | $4.97 \times 10^{-41}$ |
| 290      | $1.21 \times 10^{-24}$ | $1.38 \times 10^{-22}$ | $2.60 \times 10^5$ | $4.55 \times 10^{-41}$ | $8.63 \times 10^{-23}$ | $1.93 \times 10^{-24}$ | $2.60 \times 10^5$ | $4.55 \times 10^{-41}$ | $3.56 \times 10^{-23}$ | $4.69 \times 10^{-24}$ | $2.60 \times 10^5$ | $4.55 \times 10^{-41}$ |
| 298      | $1.15 \times 10^{-24}$ | $1.10 \times 10^{-22}$ | $3.21 \times 10^5$ | $4.25 \times 10^{-41}$ | $6.93 \times 10^{-23}$ | $1.82 \times 10^{-24}$ | $3.21 \times 10^5$ | $4.25 \times 10^{-41}$ | $3.59 \times 10^{-23}$ | $3.52 \times 10^{-24}$ | $3.21 \times 10^5$ | $4.25 \times 10^{-41}$ |
| 300      | $1.14 \times 10^{-24}$ | $1.04 \times 10^{-22}$ | $3.38 \times 10^5$ | $4.19 \times 10^{-41}$ | $6.57 \times 10^{-23}$ | $1.80 \times 10^{-24}$ | $3.38 \times 10^5$ | $4.19 \times 10^{-41}$ | $3.60 \times 10^{-23}$ | $3.28 \times 10^{-24}$ | $3.38 \times 10^5$ | $4.19 \times 10^{-41}$ |
| 310      | $1.08 \times 10^{-24}$ | $7.97 \times 10^{-23}$ | $4.30 \times 10^5$ | $3.88 \times 10^{-41}$ | $5.11 \times 10^{-23}$ | $1.68 \times 10^{-24}$ | $4.30 \times 10^5$ | $3.88 \times 10^{-41}$ | $3.65 \times 10^{-23}$ | $2.36 \times 10^{-24}$ | $4.30 \times 10^5$ | $3.88 \times 10^{-41}$ |
| 320      | $1.03 \times 10^{-24}$ | $6.23 \times 10^{-23}$ | $5.38 \times 10^5$ | $3.63 \times 10^{-41}$ | $4.04 \times 10^{-23}$ | $1.59 \times 10^{-24}$ | $5.38 \times 10^5$ | $3.63 \times 10^{-41}$ | $3.70 \times 10^{-23}$ | $1.73 \times 10^{-24}$ | $5.38 \times 10^5$ | $3.63 \times 10^{-41}$ |
| 330      | $9.85 \times 10^{-25}$ | $4.96 \times 10^{-23}$ | $6.61 \times 10^5$ | $3.42 \times 10^{-41}$ | $3.25 \times 10^{-23}$ | $1.50 \times 10^{-24}$ | $6.61 \times 10^5$ | $3.42 \times 10^{-41}$ | $3.75 \times 10^{-23}$ | $1.30 \times 10^{-24}$ | $6.61 \times 10^5$ | $3.42 \times 10^{-41}$ |
| 350      | $9.16 \times 10^{-25}$ | $3.29 \times 10^{-23}$ | $9.58 \times 10^5$ | $3.08 \times 10^{-41}$ | $2.20 \times 10^{-23}$ | $1.37 \times 10^{-24}$ | $9.58 \times 10^5$ | $3.08 \times 10^{-41}$ | $3.86 \times 10^{-23}$ | $7.81 \times 10^{-25}$ | $9.58 \times 10^5$ | $3.08 \times 10^{-41}$ |
| 375      | $8.55 \times 10^{-25}$ | $2.12 \times 10^{-23}$ | $1.42 \times 10^6$ | $2.78 \times 10^{-41}$ | $1.44 \times 10^{-23}$ | $1.25 \times 10^{-24}$ | $1.42 \times 10^6$ | $2.78 \times 10^{-41}$ | $4.01 \times 10^{-23}$ | $4.51 \times 10^{-25}$ | $1.42 \times 10^6$ | $2.78 \times 10^{-41}$ |
| 400      | $8.13 \times 10^{-25}$ | $1.45 \times 10^{-23}$ | $1.99 \times 10^6$ | $2.58 \times 10^{-41}$ | $1.01 \times 10^{-23}$ | $1.17 \times 10^{-24}$ | $1.99 \times 10^6$ | $2.58 \times 10^{-41}$ | $4.18 \times 10^{-23}$ | $2.83 \times 10^{-25}$ | $1.99 \times 10^6$ | $2.58 \times 10^{-41}$ |
| 425      | $7.84 \times 10^{-25}$ | $1.05 \times 10^{-23}$ | $2.64 \times 10^6$ | $2.45 \times 10^{-41}$ | $7.44 \times 10^{-24}$ | $1.11 \times 10^{-24}$ | $2.64 \times 10^6$ | $2.45 \times 10^{-41}$ | $4.35 \times 10^{-23}$ | $1.90 \times 10^{-25}$ | $2.64 \times 10^6$ | $2.45 \times 10^{-41}$ |
| 450      | $7.65 \times 10^{-25}$ | $7.98 \times 10^{-24}$ | $3.38 \times 10^6$ | $2.37 \times 10^{-41}$ | $5.72 \times 10^{-24}$ | $1.07 \times 10^{-24}$ | $3.38 \times 10^6$ | $2.37 \times 10^{-41}$ | $4.53 \times 10^{-23}$ | $1.35 \times 10^{-25}$ | $3.38 \times 10^6$ | $2.37 \times 10^{-41}$ |
| 475      | $7.54 \times 10^{-25}$ | $6.27 \times 10^{-24}$ | $4.18 \times 10^6$ | $2.33 \times 10^{-41}$ | $4.56 \times 10^{-24}$ | $1.04 \times 10^{-24}$ | $4.18 \times 10^6$ | $2.33 \times 10^{-41}$ | $4.72 \times 10^{-23}$ | $1.00 \times 10^{-25}$ | $4.18 \times 10^6$ | $2.33 \times 10^{-41}$ |
| 500      | $7.48 \times 10^{-25}$ | $5.08 \times 10^{-24}$ | $5.04 \times 10^6$ | $2.33 \times 10^{-41}$ | $3.74 \times 10^{-24}$ | $1.02 \times 10^{-24}$ | $5.04 \times 10^6$ | $2.33 \times 10^{-41}$ | $4.92 \times 10^{-23}$ | $7.73 \times 10^{-26}$ | $5.04 \times 10^6$ | $2.33 \times 10^{-41}$ |
| 550      | $7.52 \times 10^{-25}$ | $3.60 \times 10^{-24}$ | $6.87 \times 10^6$ | $2.40 \times 10^{-41}$ | $2.70 \times 10^{-24}$ | $1.00 \times 10^{-24}$ | $6.87 \times 10^6$ | $2.40 \times 10^{-41}$ | $5.34 \times 10^{-23}$ | $5.07 \times 10^{-26}$ | $6.87 \times 10^6$ | $2.40 \times 10^{-41}$ |
| 600      | $7.68 \times 10^{-25}$ | $2.76 \times 10^{-24}$ | $8.78 \times 10^6$ | $2.56 \times 10^{-41}$ | $2.11 \times 10^{-24}$ | $1.01 \times 10^{-24}$ | $8.78 \times 10^6$ | $2.56 \times 10^{-41}$ | $5.77 \times 10^{-23}$ | $3.67 \times 10^{-26}$ | $8.78 \times 10^6$ | $2.56 \times 10^{-41}$ |
| 650      | $7.95 \times 10^{-25}$ | $2.24 \times 10^{-24}$ | $1.07 \times 10^7$ | $2.80 \times 10^{-41}$ | $1.74 \times 10^{-24}$ | $1.03 \times 10^{-24}$ | $1.07 \times 10^7$ | $2.80 \times 10^{-41}$ | $6.23 \times 10^{-23}$ | $2.86 \times 10^{-26}$ | $1.07 \times 10^7$ | $2.80 \times 10^{-41}$ |
| 700      | $8.30 \times 10^{-25}$ | $1.90 \times 10^{-24}$ | $1.21 \times 10^7$ | $3.00 \times 10^{-41}$ | $1.50 \times 10^{-24}$ | $1.06 \times 10^{-24}$ | $1.21 \times 10^7$ | $3.00 \times 10^{-41}$ | $6.71 \times 10^{-23}$ | $2.36 \times 10^{-26}$ | $1.21 \times 10^7$ | $3.00 \times 10^{-41}$ |
| 750      | $8.72 \times 10^{-25}$ | $1.68 \times 10^{-24}$ | $1.44 \times 10^7$ | $3.51 \times 10^{-41}$ | $1.33 \times 10^{-24}$ | $1.10 \times 10^{-24}$ | $1.44 \times 10^7$ | $3.51 \times 10^{-41}$ | $7.20 \times 10^{-23}$ | $2.03 \times 10^{-26}$ | $1.44 \times 10^7$ | $3.51 \times 10^{-41}$ |
| 800      | $9.19 \times 10^{-25}$ | $1.52 \times 10^{-24}$ | $1.62 \times 10^7$ | $3.99 \times 10^{-41}$ | $1.22 \times 10^{-24}$ | $1.14 \times 10^{-24}$ | $1.62 \times 10^7$ | $3.99 \times 10^{-41}$ | $7.71 \times 10^{-23}$ | $1.81 \times 10^{-26}$ | $1.62 \times 10^7$ | $3.99 \times 10^{-41}$ |
| 850      | $9.72 \times 10^{-25}$ | $1.40 \times 10^{-24}$ | $1.79 \times 10^7$ | $4.55 \times 10^{-41}$ | $1.14 \times 10^{-24}$ | $1.20 \times 10^{-24}$ | $1.79 \times 10^7$ | $4.55 \times 10^{-41}$ | $8.23 \times 10^{-23}$ | $1.66 \times 10^{-26}$ | $1.79 \times 10^7$ | $4.55 \times 10^{-41}$ |
| 900      | $1.03 \times 10^{-24}$ | $1.32 \times 10^{-24}$ | $1.95 \times 10^7$ | $5.21 \times 10^{-41}$ | $1.08 \times 10^{-24}$ | $1.26 \times 10^{-24}$ | $1.95 \times 10^7$ | $5.21 \times 10^{-41}$ | $8.77 \times 10^{-23}$ | $1.55 \times 10^{-26}$ | $1.95 \times 10^7$ | $5.21 \times 10^{-41}$ |
| 950      | $1.09 \times 10^{-24}$ | $1.26 \times 10^{-24}$ | $2.10 \times 10^7$ | $5.98 \times 10^{-41}$ | $1.04 \times 10^{-24}$ | $1.33 \times 10^{-24}$ | $2.10 \times 10^7$ | $5.98 \times 10^{-41}$ | $9.32 \times 10^{-23}$ | $1.48 \times 10^{-26}$ | $2.10 \times 10^7$ | $5.98 \times 10^{-41}$ |
| 1000     | $1.16 \times 10^{-24}$ | $1.22 \times 10^{-24}$ | $2.25 \times 10^7$ | $6.86 \times 10^{-41}$ | $1.01 \times 10^{-24}$ | $1.40 \times 10^{-24}$ | $2.25 \times 10^7$ | $6.86 \times 10^{-41}$ | $9.89 \times 10^{-23}$ | $1.43 \times 10^{-26}$ | $2.25 \times 10^7$ | $6.86 \times 10^{-41}$ |

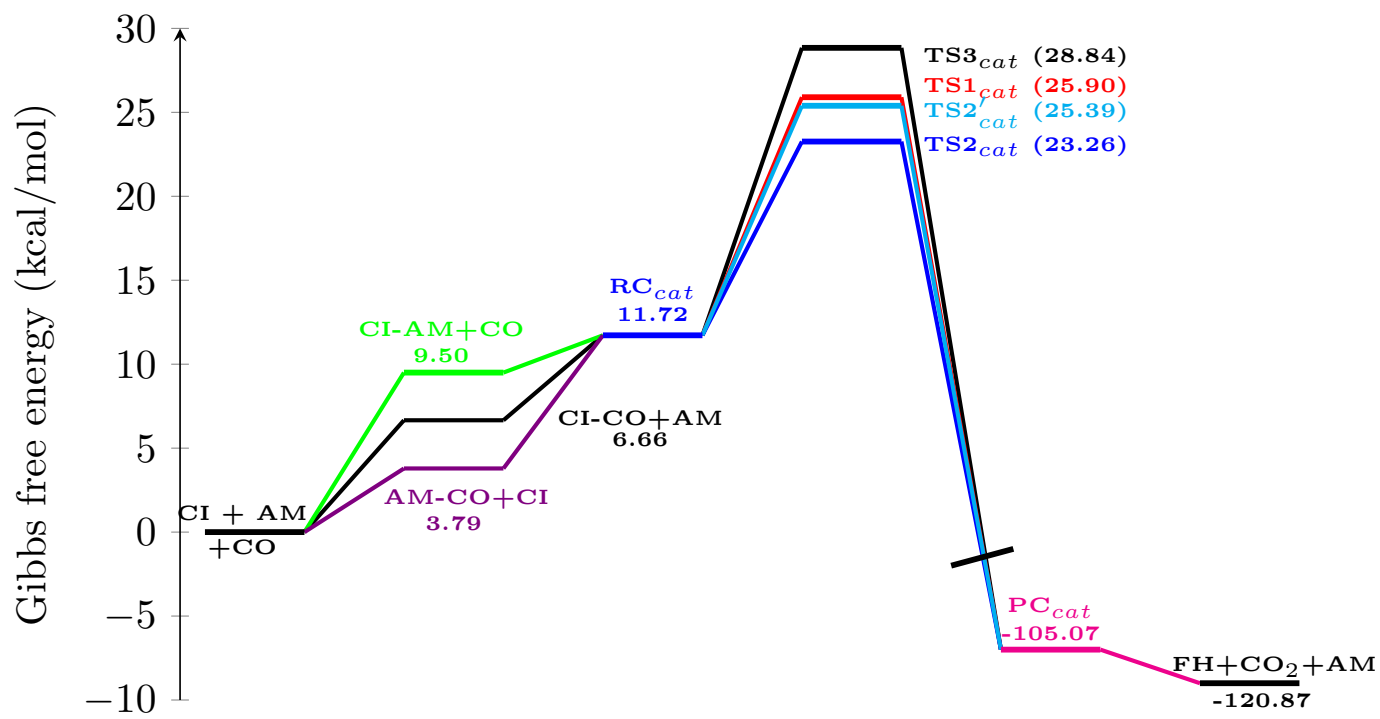

Figure S1: Gibbs free energy profile for CH<sub>2</sub>OO + CO reaction in presence of AM calculated at CCSD(T)/aug-cc-pVTZ//M06-2X/aug-cc-pVTZ level of theory.

Table S13: Bimolecular rate constant  $k_b$  in ( $\text{cm}^3 \text{ molecule}^{-1} \text{ sec}^{-1}$ ) for FA catalyzed channel corresponds to TS2 within temperature range 213-1000 K

| Temp (K) | path A                 | path B                 | path C                 | total                  |
|----------|------------------------|------------------------|------------------------|------------------------|
| 213      | $1.79 \times 10^{-21}$ | $3.20 \times 10^{-25}$ | $1.66 \times 10^{-22}$ | $1.96 \times 10^{-21}$ |
| 216      | $2.24 \times 10^{-21}$ | $4.57 \times 10^{-25}$ | $2.03 \times 10^{-22}$ | $2.44 \times 10^{-21}$ |
| 219      | $2.78 \times 10^{-21}$ | $6.47 \times 10^{-25}$ | $2.48 \times 10^{-22}$ | $3.03 \times 10^{-21}$ |
| 224      | $3.96 \times 10^{-21}$ | $1.14 \times 10^{-24}$ | $3.42 \times 10^{-22}$ | $4.30 \times 10^{-21}$ |
| 235      | $8.23 \times 10^{-21}$ | $3.63 \times 10^{-24}$ | $6.67 \times 10^{-22}$ | $8.90 \times 10^{-21}$ |
| 250      | $2.06 \times 10^{-20}$ | $1.53 \times 10^{-23}$ | $1.54 \times 10^{-21}$ | $2.22 \times 10^{-20}$ |
| 259      | $3.43 \times 10^{-20}$ | $3.39 \times 10^{-23}$ | $2.46 \times 10^{-21}$ | $3.68 \times 10^{-20}$ |
| 265      | $4.74 \times 10^{-20}$ | $5.60 \times 10^{-23}$ | $3.31 \times 10^{-21}$ | $5.08 \times 10^{-20}$ |
| 278      | $9.19 \times 10^{-20}$ | $1.55 \times 10^{-22}$ | $6.08 \times 10^{-21}$ | $9.82 \times 10^{-20}$ |
| 280      | $1.01 \times 10^{-19}$ | $1.81 \times 10^{-22}$ | $6.64 \times 10^{-21}$ | $1.08 \times 10^{-19}$ |
| 290      | $1.62 \times 10^{-19}$ | $3.71 \times 10^{-22}$ | $1.02 \times 10^{-20}$ | $1.73 \times 10^{-19}$ |
| 298      | $2.32 \times 10^{-19}$ | $6.39 \times 10^{-22}$ | $1.42 \times 10^{-20}$ | $2.47 \times 10^{-19}$ |
| 300      | $2.53 \times 10^{-19}$ | $7.29 \times 10^{-22}$ | $1.54 \times 10^{-20}$ | $2.69 \times 10^{-19}$ |
| 310      | $3.85 \times 10^{-19}$ | $1.38 \times 10^{-21}$ | $2.27 \times 10^{-20}$ | $4.09 \times 10^{-19}$ |
| 320      | $5.74 \times 10^{-19}$ | $2.52 \times 10^{-21}$ | $3.27 \times 10^{-20}$ | $6.09 \times 10^{-19}$ |
| 330      | $8.37 \times 10^{-19}$ | $4.44 \times 10^{-21}$ | $4.63 \times 10^{-20}$ | $8.88 \times 10^{-19}$ |
| 350      | $1.69 \times 10^{-18}$ | $1.27 \times 10^{-20}$ | $8.85 \times 10^{-20}$ | $1.79 \times 10^{-18}$ |
| 375      | $3.72 \times 10^{-18}$ | $4.07 \times 10^{-20}$ | $1.83 \times 10^{-19}$ | $3.95 \times 10^{-18}$ |
| 400      | $7.55 \times 10^{-18}$ | $1.15 \times 10^{-19}$ | $3.52 \times 10^{-19}$ | $8.01 \times 10^{-18}$ |
| 425      | $1.43 \times 10^{-17}$ | $2.89 \times 10^{-19}$ | $6.35 \times 10^{-19}$ | $1.52 \times 10^{-17}$ |
| 450      | $2.54 \times 10^{-17}$ | $6.65 \times 10^{-19}$ | $1.08 \times 10^{-18}$ | $2.72 \times 10^{-17}$ |
| 475      | $4.31 \times 10^{-17}$ | $1.41 \times 10^{-18}$ | $1.77 \times 10^{-18}$ | $4.62 \times 10^{-17}$ |
| 500      | $6.98 \times 10^{-17}$ | $2.81 \times 10^{-18}$ | $2.77 \times 10^{-18}$ | $7.54 \times 10^{-17}$ |
| 550      | $1.65 \times 10^{-16}$ | $9.35 \times 10^{-18}$ | $6.15 \times 10^{-18}$ | $1.80 \times 10^{-16}$ |
| 600      | $3.45 \times 10^{-16}$ | $2.61 \times 10^{-17}$ | $1.23 \times 10^{-17}$ | $3.83 \times 10^{-16}$ |
| 650      | $6.58 \times 10^{-16}$ | $6.32 \times 10^{-17}$ | $2.25 \times 10^{-17}$ | $7.44 \times 10^{-16}$ |
| 700      | $1.17 \times 10^{-15}$ | $1.37 \times 10^{-16}$ | $3.84 \times 10^{-17}$ | $1.34 \times 10^{-15}$ |
| 750      | $1.94 \times 10^{-15}$ | $2.71 \times 10^{-16}$ | $6.20 \times 10^{-17}$ | $2.27 \times 10^{-15}$ |
| 800      | $3.08 \times 10^{-15}$ | $4.98 \times 10^{-16}$ | $9.55 \times 10^{-17}$ | $3.67 \times 10^{-15}$ |
| 850      | $4.67 \times 10^{-15}$ | $8.61 \times 10^{-16}$ | $1.42 \times 10^{-16}$ | $5.67 \times 10^{-15}$ |
| 900      | $6.83 \times 10^{-15}$ | $1.41 \times 10^{-15}$ | $2.03 \times 10^{-16}$ | $8.45 \times 10^{-15}$ |
| 950      | $9.70 \times 10^{-15}$ | $2.21 \times 10^{-15}$ | $2.82 \times 10^{-16}$ | $1.22 \times 10^{-14}$ |
| 1000     | $1.34 \times 10^{-14}$ | $3.34 \times 10^{-15}$ | $3.83 \times 10^{-16}$ | $1.71 \times 10^{-14}$ |

Table S14: Bimolecular rate constant  $k_b$  in ( $\text{cm}^3 \text{ molecule}^{-1} \text{ sec}^{-1}$ ) for FA catalyzed channel corresponds to TS3 within temperature range 213-1000 K

| Temp (K) | path A                 | path B                 | path C                 | total                  |
|----------|------------------------|------------------------|------------------------|------------------------|
| 213      | $1.17 \times 10^{-20}$ | $2.10 \times 10^{-24}$ | $1.09 \times 10^{-21}$ | $1.28 \times 10^{-20}$ |
| 216      | $1.33 \times 10^{-20}$ | $2.72 \times 10^{-24}$ | $1.21 \times 10^{-21}$ | $1.45 \times 10^{-20}$ |
| 219      | $1.51 \times 10^{-20}$ | $3.52 \times 10^{-24}$ | $1.35 \times 10^{-21}$ | $1.65 \times 10^{-20}$ |
| 224      | $1.85 \times 10^{-20}$ | $5.31 \times 10^{-24}$ | $1.60 \times 10^{-21}$ | $2.01 \times 10^{-20}$ |
| 235      | $2.80 \times 10^{-20}$ | $1.23 \times 10^{-23}$ | $2.27 \times 10^{-21}$ | $3.02 \times 10^{-20}$ |
| 250      | $4.67 \times 10^{-20}$ | $3.47 \times 10^{-23}$ | $3.50 \times 10^{-21}$ | $5.02 \times 10^{-20}$ |
| 259      | $6.18 \times 10^{-20}$ | $6.11 \times 10^{-23}$ | $4.44 \times 10^{-21}$ | $6.63 \times 10^{-20}$ |
| 265      | $7.38 \times 10^{-20}$ | $8.73 \times 10^{-23}$ | $5.16 \times 10^{-21}$ | $7.91 \times 10^{-20}$ |
| 278      | $1.06 \times 10^{-19}$ | $1.79 \times 10^{-22}$ | $7.01 \times 10^{-21}$ | $1.13 \times 10^{-19}$ |
| 280      | $1.12 \times 10^{-19}$ | $1.99 \times 10^{-22}$ | $7.33 \times 10^{-21}$ | $1.19 \times 10^{-19}$ |
| 290      | $1.44 \times 10^{-19}$ | $3.30 \times 10^{-22}$ | $9.10 \times 10^{-21}$ | $1.54 \times 10^{-19}$ |
| 298      | $1.75 \times 10^{-19}$ | $4.82 \times 10^{-22}$ | $1.07 \times 10^{-20}$ | $1.86 \times 10^{-19}$ |
| 300      | $1.83 \times 10^{-19}$ | $5.29 \times 10^{-22}$ | $1.12 \times 10^{-20}$ | $1.95 \times 10^{-19}$ |
| 310      | $2.30 \times 10^{-19}$ | $8.23 \times 10^{-22}$ | $1.35 \times 10^{-20}$ | $2.44 \times 10^{-19}$ |
| 320      | $2.84 \times 10^{-19}$ | $1.25 \times 10^{-21}$ | $1.62 \times 10^{-20}$ | $3.02 \times 10^{-19}$ |
| 330      | $3.48 \times 10^{-19}$ | $1.85 \times 10^{-21}$ | $1.93 \times 10^{-20}$ | $3.69 \times 10^{-19}$ |
| 350      | $5.06 \times 10^{-19}$ | $3.79 \times 10^{-21}$ | $2.65 \times 10^{-20}$ | $5.36 \times 10^{-19}$ |
| 375      | $7.68 \times 10^{-19}$ | $8.40 \times 10^{-21}$ | $3.78 \times 10^{-20}$ | $8.15 \times 10^{-19}$ |
| 400      | $1.12 \times 10^{-18}$ | $1.70 \times 10^{-20}$ | $5.21 \times 10^{-20}$ | $1.19 \times 10^{-18}$ |
| 425      | $1.56 \times 10^{-18}$ | $3.17 \times 10^{-20}$ | $6.95 \times 10^{-20}$ | $1.66 \times 10^{-18}$ |
| 450      | $2.12 \times 10^{-18}$ | $5.55 \times 10^{-20}$ | $9.04 \times 10^{-20}$ | $2.27 \times 10^{-18}$ |
| 475      | $2.80 \times 10^{-18}$ | $9.20 \times 10^{-20}$ | $1.15 \times 10^{-19}$ | $3.01 \times 10^{-18}$ |
| 500      | $3.62 \times 10^{-18}$ | $1.46 \times 10^{-19}$ | $1.44 \times 10^{-19}$ | $3.91 \times 10^{-18}$ |
| 550      | $5.73 \times 10^{-18}$ | $3.25 \times 10^{-19}$ | $2.14 \times 10^{-19}$ | $6.27 \times 10^{-18}$ |
| 600      | $8.53 \times 10^{-18}$ | $6.46 \times 10^{-19}$ | $3.04 \times 10^{-19}$ | $9.48 \times 10^{-18}$ |
| 650      | $1.21 \times 10^{-17}$ | $1.17 \times 10^{-18}$ | $4.15 \times 10^{-19}$ | $1.37 \times 10^{-17}$ |
| 700      | $1.67 \times 10^{-17}$ | $1.96 \times 10^{-18}$ | $5.49 \times 10^{-19}$ | $1.92 \times 10^{-17}$ |
| 750      | $2.22 \times 10^{-17}$ | $3.10 \times 10^{-18}$ | $7.08 \times 10^{-19}$ | $2.60 \times 10^{-17}$ |
| 800      | $2.89 \times 10^{-17}$ | $4.67 \times 10^{-18}$ | $8.96 \times 10^{-19}$ | $3.44 \times 10^{-17}$ |
| 850      | $3.67 \times 10^{-17}$ | $6.77 \times 10^{-18}$ | $1.11 \times 10^{-18}$ | $4.46 \times 10^{-17}$ |
| 900      | $4.59 \times 10^{-17}$ | $9.49 \times 10^{-18}$ | $1.36 \times 10^{-18}$ | $5.68 \times 10^{-17}$ |
| 950      | $5.66 \times 10^{-17}$ | $1.29 \times 10^{-17}$ | $1.65 \times 10^{-18}$ | $7.11 \times 10^{-17}$ |
| 1000     | $6.87 \times 10^{-17}$ | $1.72 \times 10^{-17}$ | $1.97 \times 10^{-18}$ | $8.78 \times 10^{-17}$ |

Table S15: Relative energies ( $\Delta E$ ) including ZPE in kcal mol<sup>1</sup> for all the species with respect to the isolated reactants at the CCSD(T)/aug-cc-pVTZ level of theory in the presence of FA as a catalyst.

| Species             | $\Delta E$ |
|---------------------|------------|
| CI-CO               | -1.48      |
| PC <sub>uncat</sub> | -121.43    |
| RC <sub>cat</sub>   | -6.32      |
| TS2 <sub>cat</sub>  | 5.54       |
| TS3 <sub>cat</sub>  | 2.84       |
| PC <sub>cat</sub>   | -128.84    |
| Product             | -119.22    |
| CI-FA               | -6.0       |
| FA-CO               | -1.41      |

Table S16: Termolecular rate constant  $k_t$  in ( $\text{cm}^6 \text{ molecule}^{-2} \text{ sec}^{-1}$ ) for  $(\text{H}_2\text{O})_2$  catalyzed channel corresponds to TS2 within the temperature range of 213-1000K

| Temp (K) | PATH A                 |                        |                       |                        | PATH B                 |                        |                       |                        | PATH C                 |                        |                       |                        |
|----------|------------------------|------------------------|-----------------------|------------------------|------------------------|------------------------|-----------------------|------------------------|------------------------|------------------------|-----------------------|------------------------|
|          | keq1                   | keq2                   | kuni                  | kt                     | keq1                   | keq2                   | kuni                  | kt                     | keq1                   | keq2                   | kuni                  | kt                     |
| 213      | $2.64 \times 10^{-24}$ | $5.77 \times 10^{-23}$ | $3.11 \times 10^1$    | $5.17 \times 10^{-45}$ | $1.48 \times 10^{-20}$ | $1.03 \times 10^{-26}$ | $3.11 \times 10^1$    | $5.17 \times 10^{-45}$ | $2.85 \times 10^{-23}$ | $5.35 \times 10^{-24}$ | $3.11 \times 10^1$    | $5.17 \times 10^{-45}$ |
| 216      | $2.52 \times 10^{-24}$ | $5.00 \times 10^{-23}$ | $4.48 \times 10^1$    | $6.16 \times 10^{-45}$ | $1.23 \times 10^{-20}$ | $1.02 \times 10^{-26}$ | $4.48 \times 10^1$    | $6.16 \times 10^{-45}$ | $2.78 \times 10^{-23}$ | $4.54 \times 10^{-24}$ | $4.48 \times 10^1$    | $6.16 \times 10^{-45}$ |
| 219      | $2.41 \times 10^{-24}$ | $4.35 \times 10^{-23}$ | $6.39 \times 10^1$    | $7.31 \times 10^{-45}$ | $1.04 \times 10^{-20}$ | $1.01 \times 10^{-26}$ | $6.39 \times 10^1$    | $7.31 \times 10^{-45}$ | $2.71 \times 10^{-23}$ | $3.88 \times 10^{-24}$ | $6.39 \times 10^1$    | $7.31 \times 10^{-45}$ |
| 224      | $2.25 \times 10^{-24}$ | $3.49 \times 10^{-23}$ | $1.14 \times 10^2$    | $9.67 \times 10^{-45}$ | $7.83 \times 10^{-21}$ | $1.00 \times 10^{-26}$ | $1.14 \times 10^2$    | $9.67 \times 10^{-45}$ | $2.61 \times 10^{-23}$ | $3.01 \times 10^{-24}$ | $1.14 \times 10^2$    | $9.67 \times 10^{-45}$ |
| 225      | $1.96 \times 10^{-24}$ | $2.22 \times 10^{-23}$ | $3.71 \times 10^2$    | $1.74 \times 10^{-44}$ | $4.44 \times 10^{-21}$ | $9.79 \times 10^{-27}$ | $3.71 \times 10^2$    | $1.74 \times 10^{-44}$ | $2.42 \times 10^{-23}$ | $1.80 \times 10^{-24}$ | $3.71 \times 10^2$    | $1.74 \times 10^{-44}$ |
| 250      | $1.66 \times 10^{-24}$ | $1.29 \times 10^{-23}$ | $1.60 \times 10^3$    | $3.69 \times 10^{-44}$ | $2.23 \times 10^{-21}$ | $9.60 \times 10^{-27}$ | $1.60 \times 10^3$    | $3.69 \times 10^{-44}$ | $2.22 \times 10^{-23}$ | $9.66 \times 10^{-25}$ | $1.60 \times 10^3$    | $3.69 \times 10^{-44}$ |
| 259      | $1.53 \times 10^{-24}$ | $9.63 \times 10^{-24}$ | $3.56 \times 10^3$    | $5.62 \times 10^{-44}$ | $1.54 \times 10^{-21}$ | $9.52 \times 10^{-27}$ | $3.56 \times 10^3$    | $5.62 \times 10^{-44}$ | $2.13 \times 10^{-23}$ | $6.91 \times 10^{-25}$ | $3.56 \times 10^3$    | $5.62 \times 10^{-44}$ |
| 265      | $1.45 \times 10^{-24}$ | $8.03 \times 10^{-24}$ | $5.90 \times 10^3$    | $7.36 \times 10^{-44}$ | $1.23 \times 10^{-21}$ | $9.49 \times 10^{-27}$ | $5.90 \times 10^3$    | $7.36 \times 10^{-44}$ | $2.08 \times 10^{-23}$ | $5.61 \times 10^{-25}$ | $5.90 \times 10^3$    | $7.36 \times 10^{-44}$ |
| 278      | $1.31 \times 10^{-24}$ | $5.60 \times 10^{-24}$ | $1.64 \times 10^4$    | $1.29 \times 10^{-43}$ | $7.74 \times 10^{-22}$ | $9.46 \times 10^{-27}$ | $1.64 \times 10^4$    | $1.29 \times 10^{-43}$ | $1.98 \times 10^{-23}$ | $3.70 \times 10^{-25}$ | $1.64 \times 10^4$    | $1.29 \times 10^{-43}$ |
| 280      | $1.29 \times 10^{-24}$ | $5.31 \times 10^{-24}$ | $1.91 \times 10^4$    | $1.40 \times 10^{-43}$ | $7.25 \times 10^{-22}$ | $9.46 \times 10^{-27}$ | $1.91 \times 10^4$    | $1.40 \times 10^{-43}$ | $1.97 \times 10^{-23}$ | $3.48 \times 10^{-25}$ | $1.91 \times 10^4$    | $1.40 \times 10^{-43}$ |
| 290      | $1.21 \times 10^{-24}$ | $4.14 \times 10^{-24}$ | $3.91 \times 10^4$    | $2.09 \times 10^{-43}$ | $5.28 \times 10^{-22}$ | $9.48 \times 10^{-27}$ | $3.91 \times 10^4$    | $2.09 \times 10^{-43}$ | $1.91 \times 10^{-23}$ | $2.62 \times 10^{-25}$ | $3.91 \times 10^4$    | $2.09 \times 10^{-43}$ |
| 298      | $1.15 \times 10^{-24}$ | $3.45 \times 10^{-24}$ | $6.72 \times 10^4$    | $2.84 \times 10^{-43}$ | $4.17 \times 10^{-22}$ | $9.51 \times 10^{-27}$ | $6.72 \times 10^4$    | $2.84 \times 10^{-43}$ | $1.88 \times 10^{-23}$ | $2.11 \times 10^{-25}$ | $6.72 \times 10^4$    | $2.84 \times 10^{-43}$ |
| 300      | $1.14 \times 10^{-24}$ | $3.30 \times 10^{-24}$ | $7.67 \times 10^4$    | $3.06 \times 10^{-43}$ | $3.94 \times 10^{-22}$ | $9.52 \times 10^{-27}$ | $7.67 \times 10^4$    | $3.06 \times 10^{-43}$ | $1.87 \times 10^{-23}$ | $2.01 \times 10^{-25}$ | $7.67 \times 10^4$    | $3.06 \times 10^{-43}$ |
| 310      | $1.08 \times 10^{-24}$ | $2.67 \times 10^{-24}$ | $1.44 \times 10^5$    | $4.41 \times 10^{-43}$ | $3.01 \times 10^{-22}$ | $9.57 \times 10^{-27}$ | $1.44 \times 10^5$    | $4.41 \times 10^{-43}$ | $1.83 \times 10^{-23}$ | $1.57 \times 10^{-25}$ | $1.44 \times 10^5$    | $4.41 \times 10^{-43}$ |
| 320      | $1.03 \times 10^{-24}$ | $2.20 \times 10^{-24}$ | $2.61 \times 10^5$    | $6.26 \times 10^{-43}$ | $2.34 \times 10^{-22}$ | $9.65 \times 10^{-27}$ | $2.61 \times 10^5$    | $6.26 \times 10^{-43}$ | $1.80 \times 10^{-23}$ | $1.25 \times 10^{-25}$ | $2.61 \times 10^5$    | $6.26 \times 10^{-43}$ |
| 330      | $9.85 \times 10^{-25}$ | $1.84 \times 10^{-24}$ | $4.56 \times 10^5$    | $8.75 \times 10^{-43}$ | $1.86 \times 10^{-22}$ | $9.74 \times 10^{-27}$ | $4.56 \times 10^5$    | $8.75 \times 10^{-43}$ | $1.78 \times 10^{-23}$ | $1.02 \times 10^{-25}$ | $4.56 \times 10^5$    | $8.75 \times 10^{-43}$ |
| 350      | $9.16 \times 10^{-25}$ | $1.33 \times 10^{-24}$ | $1.27 \times 10^6$    | $1.64 \times 10^{-42}$ | $1.22 \times 10^{-22}$ | $9.98 \times 10^{-27}$ | $1.27 \times 10^6$    | $1.64 \times 10^{-42}$ | $1.75 \times 10^{-23}$ | $6.97 \times 10^{-26}$ | $1.27 \times 10^6$    | $1.64 \times 10^{-42}$ |
| 375      | $8.55 \times 10^{-25}$ | $9.46 \times 10^{-25}$ | $3.94 \times 10^6$    | $3.37 \times 10^{-42}$ | $7.81 \times 10^{-23}$ | $1.03 \times 10^{-26}$ | $3.94 \times 10^6$    | $3.37 \times 10^{-42}$ | $1.74 \times 10^{-23}$ | $4.65 \times 10^{-26}$ | $3.94 \times 10^6$    | $3.37 \times 10^{-42}$ |
| 400      | $8.13 \times 10^{-25}$ | $7.09 \times 10^{-25}$ | $1.06 \times 10^7$    | $6.51 \times 10^{-42}$ | $5.34 \times 10^{-23}$ | $1.08 \times 10^{-26}$ | $1.06 \times 10^7$    | $6.51 \times 10^{-42}$ | $1.74 \times 10^{-23}$ | $3.31 \times 10^{-26}$ | $1.06 \times 10^7$    | $6.51 \times 10^{-42}$ |
| 425      | $7.84 \times 10^{-25}$ | $5.56 \times 10^{-25}$ | $2.56 \times 10^7$    | $1.19 \times 10^{-41}$ | $3.86 \times 10^{-23}$ | $1.13 \times 10^{-26}$ | $2.56 \times 10^7$    | $1.19 \times 10^{-41}$ | $1.76 \times 10^{-23}$ | $2.48 \times 10^{-26}$ | $2.56 \times 10^7$    | $1.19 \times 10^{-41}$ |
| 450      | $7.65 \times 10^{-25}$ | $4.53 \times 10^{-25}$ | $5.62 \times 10^7$    | $2.08 \times 10^{-41}$ | $2.92 \times 10^{-23}$ | $1.18 \times 10^{-26}$ | $5.62 \times 10^7$    | $2.08 \times 10^{-41}$ | $1.79 \times 10^{-23}$ | $1.93 \times 10^{-26}$ | $5.62 \times 10^7$    | $2.08 \times 10^{-41}$ |
| 475      | $7.54 \times 10^{-25}$ | $3.79 \times 10^{-25}$ | $1.14 \times 10^8$    | $3.48 \times 10^{-41}$ | $2.30 \times 10^{-23}$ | $1.25 \times 10^{-26}$ | $1.14 \times 10^8$    | $3.48 \times 10^{-41}$ | $1.84 \times 10^{-23}$ | $1.56 \times 10^{-26}$ | $1.14 \times 10^8$    | $3.48 \times 10^{-41}$ |
| 500      | $7.48 \times 10^{-25}$ | $3.26 \times 10^{-25}$ | $2.14 \times 10^8$    | $5.64 \times 10^{-41}$ | $1.86 \times 10^{-23}$ | $1.31 \times 10^{-26}$ | $2.14 \times 10^8$    | $5.64 \times 10^{-41}$ | $1.89 \times 10^{-23}$ | $1.29 \times 10^{-26}$ | $2.14 \times 10^8$    | $5.64 \times 10^{-41}$ |
| 550      | $7.52 \times 10^{-25}$ | $2.56 \times 10^{-25}$ | $6.42 \times 10^8$    | $1.35 \times 10^{-40}$ | $1.32 \times 10^{-23}$ | $1.46 \times 10^{-26}$ | $6.42 \times 10^8$    | $1.35 \times 10^{-40}$ | $2.01 \times 10^{-23}$ | $9.59 \times 10^{-27}$ | $6.42 \times 10^8$    | $1.35 \times 10^{-40}$ |
| 600      | $7.68 \times 10^{-25}$ | $2.14 \times 10^{-25}$ | $1.61 \times 10^9$    | $2.94 \times 10^{-40}$ | $1.02 \times 10^{-23}$ | $1.62 \times 10^{-26}$ | $1.61 \times 10^9$    | $2.94 \times 10^{-40}$ | $2.16 \times 10^{-23}$ | $7.63 \times 10^{-27}$ | $1.61 \times 10^9$    | $2.94 \times 10^{-40}$ |
| 650      | $7.95 \times 10^{-25}$ | $1.88 \times 10^{-25}$ | $3.50 \times 10^9$    | $5.91 \times 10^{-40}$ | $8.29 \times 10^{-24}$ | $1.80 \times 10^{-26}$ | $3.50 \times 10^9$    | $5.91 \times 10^{-40}$ | $2.33 \times 10^{-23}$ | $6.41 \times 10^{-27}$ | $3.50 \times 10^9$    | $5.91 \times 10^{-40}$ |
| 700      | $8.30 \times 10^{-25}$ | $1.71 \times 10^{-25}$ | $6.84 \times 10^9$    | $1.11 \times 10^{-39}$ | $7.07 \times 10^{-24}$ | $2.00 \times 10^{-26}$ | $6.84 \times 10^9$    | $1.11 \times 10^{-39}$ | $2.52 \times 10^{-23}$ | $5.62 \times 10^{-27}$ | $6.84 \times 10^9$    | $1.11 \times 10^{-39}$ |
| 750      | $8.72 \times 10^{-25}$ | $1.59 \times 10^{-25}$ | $1.22 \times 10^{10}$ | $1.98 \times 10^{-39}$ | $6.25 \times 10^{-24}$ | $2.22 \times 10^{-26}$ | $1.22 \times 10^{10}$ | $1.98 \times 10^{-39}$ | $2.75 \times 10^{-23}$ | $5.08 \times 10^{-27}$ | $1.22 \times 10^{10}$ | $1.98 \times 10^{-39}$ |
| 800      | $9.19 \times 10^{-25}$ | $1.52 \times 10^{-25}$ | $2.03 \times 10^{10}$ | $3.37 \times 10^{-39}$ | $5.68 \times 10^{-24}$ | $2.45 \times 10^{-26}$ | $2.03 \times 10^{10}$ | $3.37 \times 10^{-39}$ | $2.96 \times 10^{-23}$ | $4.70 \times 10^{-27}$ | $2.03 \times 10^{10}$ | $3.37 \times 10^{-39}$ |
| 850      | $9.72 \times 10^{-25}$ | $1.47 \times 10^{-25}$ | $3.18 \times 10^{10}$ | $5.51 \times 10^{-39}$ | $5.27 \times 10^{-24}$ | $2.71 \times 10^{-26}$ | $3.18 \times 10^{10}$ | $5.51 \times 10^{-39}$ | $3.21 \times 10^{-23}$ | $4.45 \times 10^{-27}$ | $3.18 \times 10^{10}$ | $5.51 \times 10^{-39}$ |
| 900      | $1.03 \times 10^{-24}$ | $1.44 \times 10^{-25}$ | $4.75 \times 10^{10}$ | $8.70 \times 10^{-39}$ | $4.98 \times 10^{-24}$ | $2.97 \times 10^{-26}$ | $4.75 \times 10^{10}$ | $8.70 \times 10^{-39}$ | $3.47 \times 10^{-23}$ | $4.27 \times 10^{-27}$ | $4.75 \times 10^{10}$ | $8.70 \times 10^{-39}$ |
| 950      | $1.09 \times 10^{-24}$ | $1.43 \times 10^{-25}$ | $6.79 \times 10^{10}$ | $1.33 \times 10^{-38}$ | $4.78 \times 10^{-24}$ | $3.26 \times 10^{-26}$ | $6.79 \times 10^{10}$ | $1.33 \times 10^{-38}$ | $3.75 \times 10^{-23}$ | $4.16 \times 10^{-27}$ | $6.79 \times 10^{10}$ | $1.33 \times 10^{-38}$ |
| 1000     | $1.16 \times 10^{-24}$ | $1.43 \times 10^{-25}$ | $9.38 \times 10^{10}$ | $1.98 \times 10^{-38}$ | $4.64 \times 10^{-24}$ | $3.57 \times 10^{-26}$ | $9.38 \times 10^{10}$ | $1.98 \times 10^{-38}$ | $4.05 \times 10^{-23}$ | $4.09 \times 10^{-27}$ | $9.38 \times 10^{10}$ | $1.98 \times 10^{-38}$ |

Table S17: Termolecular rate constant  $k_t$  in ( $\text{cm}^6 \text{ molecule}^{-2} \text{ sec}^{-1}$ ) for FA catalyzed channel corresponds to TS3 within the temperature range of 213-1000K

| Temp (K) | PATH A                 |                        |                    |                        | PATH B                 |                        |                    |                        | PATH C                 |                        |                    |                        |
|----------|------------------------|------------------------|--------------------|------------------------|------------------------|------------------------|--------------------|------------------------|------------------------|------------------------|--------------------|------------------------|
|          | keq1                   | keq2                   | kuni               | kt                     | keq1                   | keq2                   | kuni               | kt                     | keq1                   | keq2                   | kuni               | kt                     |
| 213      | $2.64 \times 10^{-24}$ | $5.77 \times 10^{-23}$ | $2.03 \times 10^2$ | $3.38 \times 10^{-44}$ | $1.48 \times 10^{-20}$ | $1.03 \times 10^{-26}$ | $2.03 \times 10^2$ | $3.38 \times 10^{-44}$ | $2.85 \times 10^{-23}$ | $5.35 \times 10^{-24}$ | $2.03 \times 10^2$ | $3.38 \times 10^{-44}$ |
| 216      | $2.52 \times 10^{-24}$ | $5.00 \times 10^{-23}$ | $2.67 \times 10^2$ | $3.67 \times 10^{-44}$ | $1.23 \times 10^{-20}$ | $1.02 \times 10^{-26}$ | $2.67 \times 10^2$ | $3.67 \times 10^{-44}$ | $2.78 \times 10^{-23}$ | $4.54 \times 10^{-24}$ | $2.67 \times 10^2$ | $3.67 \times 10^{-44}$ |
| 219      | $2.41 \times 10^{-24}$ | $4.35 \times 10^{-23}$ | $3.47 \times 10^2$ | $3.97 \times 10^{-44}$ | $1.04 \times 10^{-20}$ | $1.01 \times 10^{-26}$ | $3.47 \times 10^2$ | $3.97 \times 10^{-44}$ | $2.71 \times 10^{-23}$ | $3.88 \times 10^{-24}$ | $3.47 \times 10^2$ | $3.97 \times 10^{-44}$ |
| 224      | $2.25 \times 10^{-24}$ | $3.49 \times 10^{-23}$ | $5.30 \times 10^2$ | $4.52 \times 10^{-44}$ | $7.83 \times 10^{-21}$ | $1.00 \times 10^{-26}$ | $5.30 \times 10^2$ | $4.52 \times 10^{-44}$ | $2.61 \times 10^{-23}$ | $3.01 \times 10^{-24}$ | $5.30 \times 10^2$ | $4.52 \times 10^{-44}$ |
| 235      | $1.96 \times 10^{-24}$ | $2.22 \times 10^{-23}$ | $1.26 \times 10^3$ | $5.92 \times 10^{-44}$ | $4.44 \times 10^{-21}$ | $9.79 \times 10^{-27}$ | $1.26 \times 10^3$ | $5.92 \times 10^{-44}$ | $2.42 \times 10^{-23}$ | $1.80 \times 10^{-24}$ | $1.26 \times 10^3$ | $5.92 \times 10^{-44}$ |
| 250      | $1.66 \times 10^{-24}$ | $1.29 \times 10^{-23}$ | $3.62 \times 10^3$ | $8.35 \times 10^{-44}$ | $2.23 \times 10^{-21}$ | $9.60 \times 10^{-27}$ | $3.62 \times 10^3$ | $8.35 \times 10^{-44}$ | $2.22 \times 10^{-23}$ | $9.66 \times 10^{-25}$ | $3.62 \times 10^3$ | $8.35 \times 10^{-44}$ |
| 259      | $1.53 \times 10^{-24}$ | $9.63 \times 10^{-24}$ | $6.42 \times 10^3$ | $1.01 \times 10^{-43}$ | $1.54 \times 10^{-21}$ | $9.52 \times 10^{-27}$ | $6.42 \times 10^3$ | $1.01 \times 10^{-43}$ | $2.13 \times 10^{-23}$ | $6.91 \times 10^{-25}$ | $6.42 \times 10^3$ | $1.01 \times 10^{-43}$ |
| 265      | $1.45 \times 10^{-24}$ | $8.03 \times 10^{-24}$ | $9.19 \times 10^3$ | $1.15 \times 10^{-43}$ | $1.23 \times 10^{-21}$ | $9.49 \times 10^{-27}$ | $9.19 \times 10^3$ | $1.15 \times 10^{-43}$ | $2.08 \times 10^{-23}$ | $5.61 \times 10^{-25}$ | $9.19 \times 10^3$ | $1.15 \times 10^{-43}$ |
| 278      | $1.31 \times 10^{-24}$ | $5.60 \times 10^{-24}$ | $1.90 \times 10^4$ | $1.48 \times 10^{-43}$ | $7.74 \times 10^{-22}$ | $9.46 \times 10^{-27}$ | $1.90 \times 10^4$ | $1.48 \times 10^{-43}$ | $1.98 \times 10^{-23}$ | $3.70 \times 10^{-25}$ | $1.90 \times 10^4$ | $1.48 \times 10^{-43}$ |
| 280      | $1.29 \times 10^{-24}$ | $5.31 \times 10^{-24}$ | $2.11 \times 10^4$ | $1.54 \times 10^{-43}$ | $7.25 \times 10^{-22}$ | $9.46 \times 10^{-27}$ | $2.11 \times 10^4$ | $1.54 \times 10^{-43}$ | $1.97 \times 10^{-23}$ | $3.48 \times 10^{-25}$ | $2.11 \times 10^4$ | $1.54 \times 10^{-43}$ |
| 290      | $1.21 \times 10^{-24}$ | $4.14 \times 10^{-24}$ | $3.48 \times 10^4$ | $1.86 \times 10^{-43}$ | $5.28 \times 10^{-22}$ | $9.48 \times 10^{-27}$ | $3.48 \times 10^4$ | $1.86 \times 10^{-43}$ | $1.91 \times 10^{-23}$ | $2.62 \times 10^{-25}$ | $3.48 \times 10^4$ | $1.86 \times 10^{-43}$ |
| 298      | $1.15 \times 10^{-24}$ | $3.45 \times 10^{-24}$ | $5.08 \times 10^4$ | $2.14 \times 10^{-43}$ | $4.17 \times 10^{-22}$ | $9.51 \times 10^{-27}$ | $5.08 \times 10^4$ | $2.14 \times 10^{-43}$ | $1.88 \times 10^{-23}$ | $2.11 \times 10^{-25}$ | $5.08 \times 10^4$ | $2.14 \times 10^{-43}$ |
| 300      | $1.14 \times 10^{-24}$ | $3.30 \times 10^{-24}$ | $5.56 \times 10^4$ | $2.22 \times 10^{-43}$ | $3.94 \times 10^{-22}$ | $9.52 \times 10^{-27}$ | $5.56 \times 10^4$ | $2.22 \times 10^{-43}$ | $1.87 \times 10^{-23}$ | $2.01 \times 10^{-25}$ | $5.56 \times 10^4$ | $2.22 \times 10^{-43}$ |
| 310      | $1.08 \times 10^{-24}$ | $2.67 \times 10^{-24}$ | $8.60 \times 10^4$ | $2.63 \times 10^{-43}$ | $3.01 \times 10^{-22}$ | $9.57 \times 10^{-27}$ | $8.60 \times 10^4$ | $2.63 \times 10^{-43}$ | $1.83 \times 10^{-23}$ | $1.57 \times 10^{-25}$ | $8.60 \times 10^4$ | $2.63 \times 10^{-43}$ |
| 320      | $1.03 \times 10^{-24}$ | $2.20 \times 10^{-24}$ | $1.29 \times 10^5$ | $3.10 \times 10^{-43}$ | $2.34 \times 10^{-22}$ | $9.65 \times 10^{-27}$ | $1.29 \times 10^5$ | $3.10 \times 10^{-43}$ | $1.80 \times 10^{-23}$ | $1.25 \times 10^{-25}$ | $1.29 \times 10^5$ | $3.10 \times 10^{-43}$ |
| 330      | $9.85 \times 10^{-25}$ | $1.84 \times 10^{-24}$ | $1.90 \times 10^5$ | $3.64 \times 10^{-43}$ | $1.86 \times 10^{-22}$ | $9.74 \times 10^{-27}$ | $1.90 \times 10^5$ | $3.64 \times 10^{-43}$ | $1.78 \times 10^{-23}$ | $1.02 \times 10^{-25}$ | $1.90 \times 10^5$ | $3.64 \times 10^{-43}$ |
| 350      | $9.16 \times 10^{-25}$ | $1.33 \times 10^{-24}$ | $3.80 \times 10^5$ | $4.91 \times 10^{-43}$ | $1.22 \times 10^{-22}$ | $9.98 \times 10^{-27}$ | $3.80 \times 10^5$ | $4.91 \times 10^{-43}$ | $1.75 \times 10^{-23}$ | $6.97 \times 10^{-26}$ | $3.80 \times 10^5$ | $4.91 \times 10^{-43}$ |
| 375      | $8.55 \times 10^{-25}$ | $9.46 \times 10^{-25}$ | $8.13 \times 10^5$ | $6.96 \times 10^{-43}$ | $7.81 \times 10^{-23}$ | $1.03 \times 10^{-26}$ | $8.13 \times 10^5$ | $6.96 \times 10^{-43}$ | $1.74 \times 10^{-23}$ | $4.65 \times 10^{-26}$ | $8.13 \times 10^5$ | $6.96 \times 10^{-43}$ |
| 400      | $8.13 \times 10^{-25}$ | $7.09 \times 10^{-25}$ | $1.57 \times 10^6$ | $9.63 \times 10^{-43}$ | $5.34 \times 10^{-23}$ | $1.08 \times 10^{-26}$ | $1.57 \times 10^6$ | $9.63 \times 10^{-43}$ | $1.74 \times 10^{-23}$ | $3.31 \times 10^{-26}$ | $1.57 \times 10^6$ | $9.63 \times 10^{-43}$ |
| 425      | $7.84 \times 10^{-25}$ | $5.56 \times 10^{-25}$ | $2.81 \times 10^6$ | $1.30 \times 10^{-42}$ | $3.86 \times 10^{-23}$ | $1.13 \times 10^{-26}$ | $2.81 \times 10^6$ | $1.30 \times 10^{-42}$ | $1.76 \times 10^{-23}$ | $2.48 \times 10^{-26}$ | $2.81 \times 10^6$ | $1.30 \times 10^{-42}$ |
| 450      | $7.65 \times 10^{-25}$ | $4.53 \times 10^{-25}$ | $4.69 \times 10^6$ | $1.73 \times 10^{-42}$ | $2.92 \times 10^{-23}$ | $1.18 \times 10^{-26}$ | $4.69 \times 10^6$ | $1.73 \times 10^{-42}$ | $1.79 \times 10^{-23}$ | $1.93 \times 10^{-26}$ | $4.69 \times 10^6$ | $1.73 \times 10^{-42}$ |
| 475      | $7.54 \times 10^{-25}$ | $3.79 \times 10^{-25}$ | $7.39 \times 10^6$ | $2.27 \times 10^{-42}$ | $2.30 \times 10^{-23}$ | $1.25 \times 10^{-26}$ | $7.39 \times 10^6$ | $2.27 \times 10^{-42}$ | $1.84 \times 10^{-23}$ | $1.56 \times 10^{-26}$ | $7.39 \times 10^6$ | $2.27 \times 10^{-42}$ |
| 500      | $7.48 \times 10^{-25}$ | $3.26 \times 10^{-25}$ | $1.11 \times 10^7$ | $2.93 \times 10^{-42}$ | $1.86 \times 10^{-23}$ | $1.31 \times 10^{-26}$ | $1.11 \times 10^7$ | $2.93 \times 10^{-42}$ | $1.89 \times 10^{-23}$ | $1.29 \times 10^{-26}$ | $1.11 \times 10^7$ | $2.93 \times 10^{-42}$ |
| 550      | $7.52 \times 10^{-25}$ | $2.56 \times 10^{-25}$ | $2.23 \times 10^7$ | $4.71 \times 10^{-42}$ | $1.32 \times 10^{-23}$ | $1.46 \times 10^{-26}$ | $2.23 \times 10^7$ | $4.71 \times 10^{-42}$ | $2.01 \times 10^{-23}$ | $9.59 \times 10^{-27}$ | $2.23 \times 10^7$ | $4.71 \times 10^{-42}$ |
| 600      | $7.68 \times 10^{-25}$ | $2.14 \times 10^{-25}$ | $3.98 \times 10^7$ | $7.29 \times 10^{-42}$ | $1.02 \times 10^{-23}$ | $1.62 \times 10^{-26}$ | $3.98 \times 10^7$ | $7.29 \times 10^{-42}$ | $2.16 \times 10^{-23}$ | $7.63 \times 10^{-27}$ | $3.98 \times 10^7$ | $7.29 \times 10^{-42}$ |
| 650      | $7.95 \times 10^{-25}$ | $1.88 \times 10^{-25}$ | $6.47 \times 10^7$ | $1.09 \times 10^{-41}$ | $8.29 \times 10^{-24}$ | $1.80 \times 10^{-26}$ | $6.47 \times 10^7$ | $1.09 \times 10^{-41}$ | $2.33 \times 10^{-23}$ | $6.41 \times 10^{-27}$ | $6.47 \times 10^7$ | $1.09 \times 10^{-41}$ |
| 700      | $8.30 \times 10^{-25}$ | $1.71 \times 10^{-25}$ | $9.78 \times 10^7$ | $1.59 \times 10^{-41}$ | $7.07 \times 10^{-24}$ | $2.00 \times 10^{-26}$ | $9.78 \times 10^7$ | $1.59 \times 10^{-41}$ | $2.52 \times 10^{-23}$ | $5.62 \times 10^{-27}$ | $9.78 \times 10^7$ | $1.59 \times 10^{-41}$ |
| 750      | $8.72 \times 10^{-25}$ | $1.59 \times 10^{-25}$ | $1.40 \times 10^8$ | $2.27 \times 10^{-41}$ | $6.25 \times 10^{-24}$ | $2.22 \times 10^{-26}$ | $1.40 \times 10^8$ | $2.27 \times 10^{-41}$ | $2.73 \times 10^{-23}$ | $5.08 \times 10^{-27}$ | $1.40 \times 10^8$ | $2.27 \times 10^{-41}$ |
| 800      | $9.19 \times 10^{-25}$ | $1.52 \times 10^{-25}$ | $1.91 \times 10^8$ | $3.16 \times 10^{-41}$ | $5.68 \times 10^{-24}$ | $2.45 \times 10^{-26}$ | $1.91 \times 10^8$ | $3.16 \times 10^{-41}$ | $2.96 \times 10^{-23}$ | $4.70 \times 10^{-27}$ | $1.91 \times 10^8$ | $3.16 \times 10^{-41}$ |
| 850      | $9.72 \times 10^{-25}$ | $1.47 \times 10^{-25}$ | $2.50 \times 10^8$ | $4.34 \times 10^{-41}$ | $4.97 \times 10^{-24}$ | $2.71 \times 10^{-26}$ | $2.50 \times 10^8$ | $4.34 \times 10^{-41}$ | $3.21 \times 10^{-23}$ | $4.45 \times 10^{-27}$ | $2.50 \times 10^8$ | $4.34 \times 10^{-41}$ |
| 900      | $1.03 \times 10^{-24}$ | $1.44 \times 10^{-25}$ | $3.19 \times 10^8$ | $5.85 \times 10^{-41}$ | $4.28 \times 10^{-24}$ | $2.97 \times 10^{-26}$ | $3.19 \times 10^8$ | $5.85 \times 10^{-41}$ | $3.47 \times 10^{-23}$ | $4.27 \times 10^{-27}$ | $3.19 \times 10^8$ | $5.85 \times 10^{-41}$ |
| 950      | $1.09 \times 10^{-24}$ | $1.43 \times 10^{-25}$ | $3.96 \times 10^8$ | $7.77 \times 10^{-41}$ | $4.78 \times 10^{-24}$ | $3.26 \times 10^{-26}$ | $3.96 \times 10^8$ | $7.77 \times 10^{-41}$ | $3.75 \times 10^{-23}$ | $4.16 \times 10^{-27}$ | $3.96 \times 10^8$ | $7.77 \times 10^{-41}$ |
| 1000     | $1.16 \times 10^{-24}$ | $1.43 \times 10^{-25}$ | $4.81 \times 10^8$ | $1.02 \times 10^{-40}$ | $4.64 \times 10^{-24}$ | $3.57 \times 10^{-26}$ | $4.81 \times 10^8$ | $1.02 \times 10^{-40}$ | $4.05 \times 10^{-23}$ | $4.09 \times 10^{-27}$ | $4.81 \times 10^8$ | $1.02 \times 10^{-40}$ |



Table S18: Concentrations of AM and FA in molecules  $\text{cm}^{-3}$ ,  $k_t$  in  $\text{cm}^6 \text{ molecule}^{-2} \text{ sec}^{-1}$  and  $k_{eff}$  in  $\text{cm}^3 \text{ molecule}^{-1} \text{ sec}^{-1}$  at higher altitude.

| Altitude (km) | Temp (K) | [AM]               | [FA]                  | $k_t^{AM}$             | $k_t^{FA}$             | $k_{eff}^{AM}$         | $k_{eff}^{FA}$         |
|---------------|----------|--------------------|-----------------------|------------------------|------------------------|------------------------|------------------------|
| 5             | 259      | $7.60 \times 10^9$ | $2.00 \times 10^{10}$ | $1.73 \times 10^{-42}$ | $4.72 \times 10^{-43}$ | $1.32 \times 10^{-32}$ | $9.45 \times 10^{-33}$ |
| 10            | 230      | $8.50 \times 10^8$ | $8.30 \times 10^9$    | $6.74 \times 10^{-43}$ | $2.30 \times 10^{-43}$ | $5.73 \times 10^{-34}$ | $1.91 \times 10^{-33}$ |
| 15            | 213      | $1.20 \times 10^8$ | $3.20 \times 10^9$    | $2.56 \times 10^{-43}$ | $2.56 \times 10^{-43}$ | $3.07 \times 10^{-35}$ | $8.19 \times 10^{-34}$ |

Table S19: Concentrations of AD and AW in molecules  $\text{cm}^{-3}$ ,  $k_t$  in  $\text{cm}^6 \text{ molecule}^{-2} \text{ sec}^{-1}$  and  $k_{eff}$  in  $\text{cm}^3 \text{ molecule}^{-1} \text{ sec}^{-1}$  at higher altitude.

| Altitude (km) | Temp (K) | [AD]                  | [AW]               | $k_t^{AD}$             | $k_t^{AW}$             | $k_{eff}^{AD}$         | $k_{eff}^{AW}$         |
|---------------|----------|-----------------------|--------------------|------------------------|------------------------|------------------------|------------------------|
| 5             | 259      | $4.00 \times 10^{-3}$ | $6.10 \times 10^6$ | $1.45 \times 10^{-42}$ | $3.83 \times 10^{-42}$ | $5.78 \times 10^{-45}$ | $2.34 \times 10^{-35}$ |
| 10            | 230      | $7.30 \times 10^{-5}$ | $4.20 \times 10^5$ | $1.21 \times 10^{-42}$ | $3.12 \times 10^{-42}$ | $8.81 \times 10^{-47}$ | $1.31 \times 10^{-36}$ |
| 15            | 213      | $2.10 \times 10^{-6}$ | $5.40 \times 10^2$ | $1.04 \times 10^{-42}$ | $2.57 \times 10^{-42}$ | $7.60 \times 10^{-47}$ | $1.39 \times 10^{-39}$ |

Table S20: T1 diagnostic values for the different TSs calculated at CCSD(T)/aug-cc-pVTZ level of theory.

| Species   | T1-diag |
|-----------|---------|
| TS1-uncat | 0.03565 |
| TS2-uncat | 0.02913 |
| TS3-uncat | 0.03354 |
| TS1-AM    | 0.02964 |
| TS2-AM    | 0.02458 |
| TS3-AM    | 0.02894 |
| TS2'-AM   | 0.01884 |
| TS2-FA    | 0.02378 |
| TS3-FA    | 0.02609 |
| TS1-AD    | 0.02673 |
| TS2-AD    | 0.02271 |
| TS3-AD    | 0.02607 |
| TS1-AW    | 0.02680 |
| TS2-AW    | 0.02274 |
| TS3-AW    | 0.02579 |

Table S21: Energy barrier of uncatalyzed reaction obtained at different methods from our earlier works.

| Methods             | Energy barrier (kcal mol <sup>-1</sup> ) |
|---------------------|------------------------------------------|
| CCSDT(Q)/cc-pVDZ    | 7.50                                     |
| CCSD(T)/aug-cc-pVQZ | 8.10                                     |
| CCSD(T)-F12/cc-pVTZ | 8.20                                     |
| CCSD(T)/aug-cc-pVTZ | 7.82                                     |

Table S22: Concentrations of all the catalysts (in molecule cm<sup>-3</sup>) within 280K to 320K temperature range at 0 km altitude.

| Catalysts    |           | 280                   | 290                   | 298                   | 300                   | 310                   | 320                   |
|--------------|-----------|-----------------------|-----------------------|-----------------------|-----------------------|-----------------------|-----------------------|
| AM           | 0.1 ppbv  | $2.60 \times 10^9$    | $2.50 \times 10^9$    | $2.50 \times 10^9$    | $2.40 \times 10^9$    | $2.40 \times 10^9$    | $2.30 \times 10^9$    |
|              | 10 ppbv   | $2.60 \times 10^{11}$ | $2.50 \times 10^{11}$ | $2.50 \times 10^{11}$ | $2.40 \times 10^{11}$ | $2.40 \times 10^{11}$ | $2.30 \times 10^{11}$ |
|              | 2900 ppbv | $7.60 \times 10^{13}$ | $7.30 \times 10^{13}$ | $7.10 \times 10^{13}$ | $7.10 \times 10^{13}$ | $6.90 \times 10^{13}$ | $6.70 \times 10^{13}$ |
| FA           | high      | $2.60 \times 10^{11}$ | $2.50 \times 10^{11}$ | $2.40 \times 10^{11}$ | $2.40 \times 10^{11}$ | $2.40 \times 10^{11}$ | $2.30 \times 10^{11}$ |
|              | average   | $2.00 \times 10^{10}$ | $1.90 \times 10^{10}$ | $1.90 \times 10^{10}$ | $1.90 \times 10^{10}$ | $1.80 \times 10^{10}$ | $1.80 \times 10^{10}$ |
|              | low       | $2.60 \times 10^8$    | $2.50 \times 10^8$    | $2.40 \times 10^8$    | $2.40 \times 10^8$    | $2.40 \times 10^8$    | $2.30 \times 10^8$    |
| AD           | 0.1 ppbv  | $3.90 \times 10^{-4}$ | $3.40 \times 10^{-4}$ | $3.00 \times 10^{-4}$ | $2.90 \times 10^{-4}$ | $2.60 \times 10^{-4}$ | $2.30 \times 10^{-4}$ |
|              | 10 ppbv   | 3.93                  | 3.38                  | 3.02                  | 2.93                  | 2.57                  | 2.28                  |
|              | 2900 ppbv | $3.30 \times 10^5$    | $2.80 \times 10^5$    | $2.50 \times 10^5$    | $2.50 \times 10^5$    | $2.20 \times 10^5$    | $1.90 \times 10^5$    |
| 20% RH<br>AW | 0.1 ppbv  | $2.40 \times 10^6$    | $3.30 \times 10^6$    | $4.20 \times 10^6$    | $4.40 \times 10^6$    | $5.80 \times 10^6$    | $7.30 \times 10^6$    |
|              | 10 ppbv   | $2.40 \times 10^8$    | $3.30 \times 10^8$    | $4.20 \times 10^8$    | $4.40 \times 10^8$    | $5.80 \times 10^8$    | $7.30 \times 10^8$    |
|              | 2900 ppbv | $6.90 \times 10^{10}$ | $9.50 \times 10^{10}$ | $1.20 \times 10^{11}$ | $1.30 \times 10^{11}$ | $1.70 \times 10^{11}$ | $2.10 \times 10^{11}$ |
| 100%RH       | 0.1 ppbv  | $1.20 \times 10^7$    | $1.60 \times 10^7$    | $2.10 \times 10^7$    | $2.20 \times 10^7$    | $2.90 \times 10^7$    | $3.60 \times 10^7$    |
|              | 10 ppbv   | $1.20 \times 10^9$    | $1.60 \times 10^9$    | $2.10 \times 10^9$    | $2.20 \times 10^9$    | $2.90 \times 10^9$    | $3.60 \times 10^9$    |
|              | 2900 ppbv | $3.50 \times 10^{11}$ | $4.80 \times 10^{11}$ | $6.10 \times 10^{11}$ | $6.40 \times 10^{11}$ | $8.40 \times 10^{11}$ | $1.10 \times 10^{12}$ |

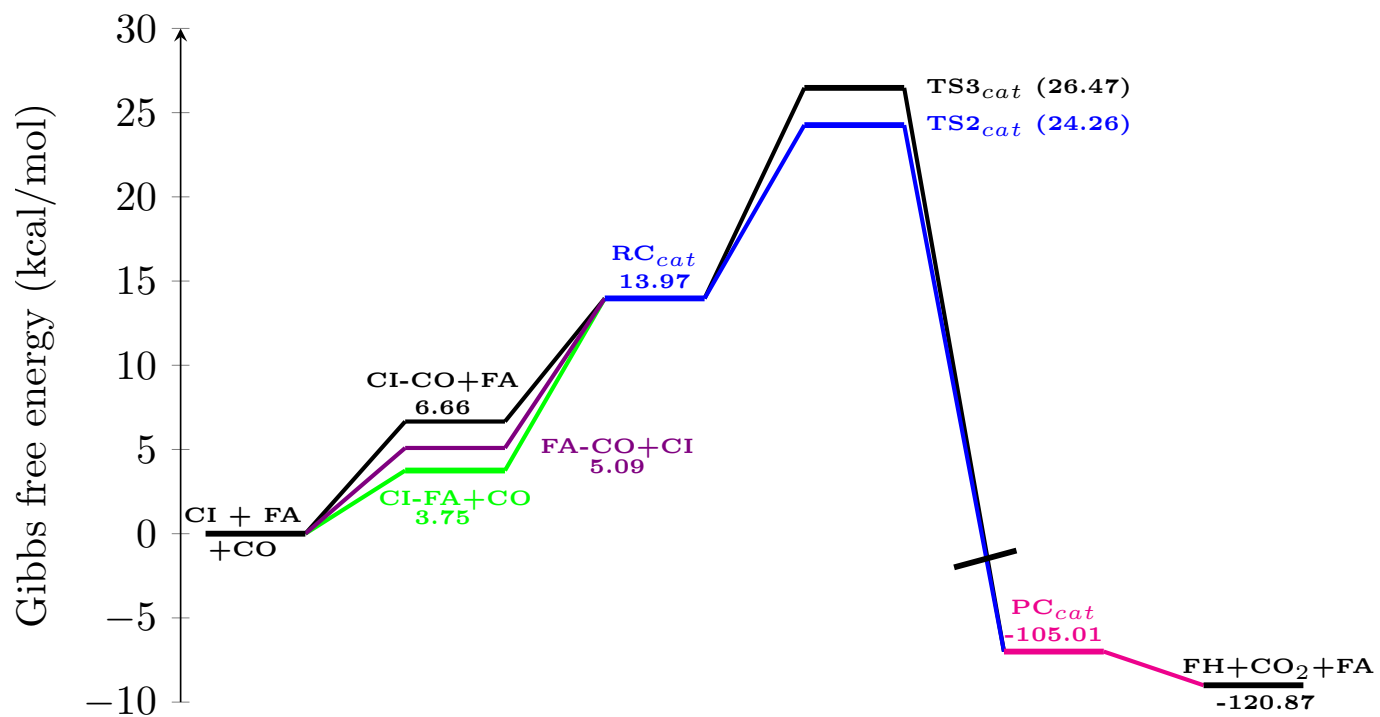

Figure S2: Gibbs free energy profile for  $\text{CH}_2\text{OO} + \text{CO}$  reaction in presence of FA calculated at CCSD(T)/aug-cc-pVTZ//M06-2X/aug-cc-pVTZ level of theory.
